# Supplementary material for: Reactions of alkynes with cis-RuCl2(dppm)2: exploring the interplay of vinylidene, alkynyl and η3-butenynyl complexes
Source: Royal Society of Chemistry journal article supplement (doi:10.1039/c5dt03844h), 2015-01-01
Supplement: c5dt03844h1.pdf [file c5dt03844h1.pdf]

# Reactions of alkynes with *cis*-RuCl<sub>2</sub>(dppm)<sub>2</sub>: exploring the interplay of vinylidene, alkynyl and η<sup>3</sup>-butenynyl complexes

Samantha G. Eaves,<sup>a,b</sup> Dmitry S. Yufit,<sup>a</sup> Brian W. Skelton,<sup>c</sup> Jason M. Lynam<sup>d</sup> and Paul J. Low<sup>b</sup>

<sup>a</sup> Department of Chemistry, Durham University, South Road, Durham DH1 3LE, UK.

<sup>b</sup> School of Chemistry and Biochemistry, Bayliss Building, The University of Western Australia, 35 Stirling Highway, Perth, Western Australia 6009, e-mail [paul.low@uwa.edu.au](mailto:paul.low@uwa.edu.au) tel (+61 8) 6488 3045

<sup>c</sup> Centre for Microscopy, Characterisation and Analysis, University of Western Australia, 35 Stirling Highway, Perth, Western Australia, 6009, Australia.

<sup>d</sup> Department of Chemistry, University of York, Heslington, York, YO10 5DD, e-mail [jason.lynam@york.ac.uk](mailto:jason.lynam@york.ac.uk) tel +44(0)1904322534

---

|      |                                                                                                                                                                                                        |    |
|------|--------------------------------------------------------------------------------------------------------------------------------------------------------------------------------------------------------|----|
| S1   | General Conditions.....                                                                                                                                                                                | 3  |
| S1.  | Synthesis of characterisation of <i>mono</i> -vinylidene complexes .....                                                                                                                               | 4  |
| S1.1 | Synthesis of <i>trans</i> -[RuCl(=C=CHC <sub>6</sub> H <sub>4</sub> -4-NO <sub>2</sub> )(dppm) <sub>2</sub> ]BF <sub>4</sub> [1a]BF <sub>4</sub> .....                                                 | 4  |
| S1.2 | Synthesis of <i>trans</i> -[RuCl(=C=CHC <sub>6</sub> H <sub>4</sub> -4-COOMe)(dppm) <sub>2</sub> ]BF <sub>4</sub> [1b]BF <sub>4</sub> .....                                                            | 5  |
| S1.3 | Synthesis of <i>trans</i> -[RuCl(=C=CHC <sub>6</sub> H <sub>4</sub> -4-C≡CSiMe <sub>3</sub> )(dppm) <sub>2</sub> ]BF <sub>4</sub> [1c]BF <sub>4</sub> .....                                            | 6  |
| S1.4 | Synthesis of <i>trans</i> -[RuCl(=C=CHC <sub>6</sub> H <sub>5</sub> )(dppm) <sub>2</sub> ]BF <sub>4</sub> [1d]BF <sub>4</sub> .....                                                                    | 7  |
| S1.5 | Synthesis of <i>trans</i> -[RuCl(=C=CHC <sub>6</sub> H <sub>4</sub> -4-Me)(dppm) <sub>2</sub> ]BF <sub>4</sub> [1e]BF <sub>4</sub> .....                                                               | 8  |
| S1.6 | Synthesis of <i>trans</i> -[RuCl(=C=CHC <sub>6</sub> H <sub>4</sub> -4-OMe)(dppm) <sub>2</sub> ]BF <sub>4</sub> [1f]BF <sub>4</sub> .....                                                              | 9  |
| S2.1 | Synthesis of <i>trans</i> -[RuCl(C≡CC <sub>6</sub> H <sub>4</sub> -4-NO <sub>2</sub> )(dppm) <sub>2</sub> ] [2a].....                                                                                  | 10 |
| S2.2 | Synthesis of <i>trans</i> -[RuCl(C≡CC <sub>6</sub> H <sub>4</sub> -4-COOMe)(dppm) <sub>2</sub> ] [2b].....                                                                                             | 11 |
| S2.3 | Synthesis of <i>trans</i> -[RuCl(C≡CC <sub>6</sub> H <sub>4</sub> C≡CSiMe <sub>3</sub> )(dppm) <sub>2</sub> ] [2c].....                                                                                | 12 |
| S2.4 | Synthesis of <i>trans</i> -[RuCl(C≡CC <sub>6</sub> H <sub>5</sub> )(dppm) <sub>2</sub> ] [2d] .....                                                                                                    | 13 |
| S2.5 | Synthesis of <i>trans</i> -[RuCl(C≡CC <sub>6</sub> H <sub>4</sub> -4-Me)(dppm) <sub>2</sub> ] [2e] .....                                                                                               | 14 |
| S2.6 | Synthesis of <i>trans</i> -[RuCl(C≡CC <sub>6</sub> H <sub>4</sub> -4-OMe)(dppm) <sub>2</sub> ] [2f].....                                                                                               | 15 |
| S3.  | Synthesis of Ruthenium <i>bis</i> -Alkynyl Complexes .....                                                                                                                                             | 16 |
| S3.1 | Synthesis of <i>trans</i> -[Ru(C≡CC <sub>6</sub> H <sub>4</sub> NO <sub>2</sub> ) <sub>2</sub> (dppm) <sub>2</sub> ] [3a].....                                                                         | 16 |
| S3.2 | Synthesis of <i>trans</i> -[Ru(C≡CC <sub>6</sub> H <sub>4</sub> -4-COOMe) <sub>2</sub> (dppm) <sub>2</sub> ] [3b] .....                                                                                | 17 |
| S3.3 | Synthesis of <i>trans</i> -[Ru(C≡CC <sub>6</sub> H <sub>4</sub> C≡CSiMe <sub>3</sub> ) <sub>2</sub> (dppm) <sub>2</sub> ] [3c] .....                                                                   | 18 |
| S4.1 | Synthesis of <i>trans</i> -[RuCl(η <sup>3</sup> -{HC(C <sub>6</sub> H <sub>4</sub> -4-Me)=CC≡CC <sub>6</sub> H <sub>4</sub> -4-Me})(dppm) <sub>2</sub> ]BF <sub>4</sub><br>[4e]BF <sub>4</sub> .....   | 19 |
| S4.2 | Synthesis of <i>trans</i> -[RuCl(η <sup>3</sup> -{HC(C <sub>6</sub> H <sub>4</sub> -4-OMe)=CC≡CC <sub>6</sub> H <sub>4</sub> -4-OMe})(dppm) <sub>2</sub> ]BF <sub>4</sub><br>[4f]BF <sub>4</sub> ..... | 21 |
| S5.  | Crystal Structure Analysis.....                                                                                                                                                                        | 22 |
| S5.1 | Structure of [2b] .....                                                                                                                                                                                | 23 |
| S5.2 | Structure of [2c] .....                                                                                                                                                                                | 25 |
| S5.3 | Structure of [2d] .....                                                                                                                                                                                | 27 |
| S5.4 | Structure of [2e] .....                                                                                                                                                                                | 29 |
| S5.5 | Structure of [2f].....                                                                                                                                                                                 | 31 |

|       |                                                  |     |
|-------|--------------------------------------------------|-----|
| S5.6  | Structure of [3b]                                | 33  |
| S5.7  | Structure of [4e] <sup>+</sup>                   | 35  |
| S6.   | Electrochemistry                                 | 37  |
| S7.   | DFT Calculations                                 | 38  |
| S7.1  | Complex [Ca]                                     | 39  |
| S7.2  | Complex [Da] <sup>+</sup>                        | 43  |
| S7.3  | Complex [Fa] <sup>+</sup>                        | 47  |
| S7.4  | Complex [3a]                                     | 51  |
| S7.5  | Complex [4a] <sup>+</sup>                        | 55  |
| S7.6  | Complex [4'a] <sup>+</sup>                       | 59  |
| S7.7  | Complex TS <sub>[Da]<sup>+</sup>-[4'a]</sub>     | 60  |
| S7.8  | Complex [Cd]                                     | 64  |
| S7.9  | Complex [Dd] <sup>+</sup>                        | 68  |
| S7.10 | Complex [Fd] <sup>+</sup>                        | 72  |
| S7.11 | Complex [3d]                                     | 76  |
| S7.12 | Complex [4d] <sup>+</sup>                        | 80  |
| S7.13 | Complex [4'd] <sup>+</sup>                       | 84  |
| S7.14 | Complex TS <sub>[Dd]<sup>+</sup>-[4'd]</sub>     | 88  |
| S7.15 | Complex [Dd-Z] <sup>+</sup>                      | 92  |
| S7.16 | Complex [4d-Z] <sup>+</sup>                      | 96  |
| S7.17 | Complex [4'd-Z] <sup>+</sup>                     | 100 |
| S7.18 | Complex TS <sub>[Dd-Z]<sup>+</sup>-[4'd-Z]</sub> | 104 |
| S7.19 | Complex [Cf]                                     | 108 |
| S7.20 | Complex [Df] <sup>+</sup>                        | 112 |
| S7.21 | Complex [Ff] <sup>+</sup>                        | 116 |
| S7.22 | Complex [3f]                                     | 120 |
| S7.23 | Complex [4f] <sup>+</sup>                        | 124 |
| S7.24 | Complex [4'f] <sup>+</sup>                       | 128 |
| S7.25 | Complex TS <sub>[Df]<sup>+</sup>-[4'f]</sub>     | 132 |
| S7.26 | Proton sponge                                    | 136 |
| S7.27 | [HProton sponge] <sup>+</sup>                    | 138 |
| S7.28 | Pyridine                                         | 140 |
| S7.29 | [Hpyridine] <sup>+</sup>                         | 142 |
| S7.30 | (MeOH) <sub>4</sub>                              | 144 |
| S7.31 | [H(MeOH) <sub>4</sub> ] <sup>+</sup>             | 146 |
| S8.   | References                                       | 148 |

## S1 General Conditions

All reactions were carried out under an atmosphere of dry nitrogen using standard Schlenk techniques. Dichloromethane was dried over  $\text{CaH}_2$ , all other solvents were standard reagent grade and used as received. No special precautions were taken to exclude air or moisture during workup. The compounds *cis*- $[\text{RuCl}_2(\text{dppm})_2]$ ;<sup>1</sup>  $\text{HC}\equiv\text{CC}_6\text{H}_4\text{-4-NO}_2$ ;<sup>2</sup>  $\text{HC}\equiv\text{CC}_6\text{H}_4\text{-4-COOMe}$ ;<sup>2</sup>  $\text{HC}\equiv\text{CC}_6\text{H}_4\text{-4-C}\equiv\text{CSiMe}_3$ <sup>3</sup> and  $\text{TlBF}_4$ <sup>4</sup> were synthesised by literature methods. All other reagents were commercially available and used as received. NMR spectra were recorded at 25 °C either on a Varian Inova 300 ( $^1\text{H}$ , 300.2 MHz;  $^{31}\text{P}$ , 121.5 MHz), Jeol 400 ( $^1\text{H}$ , 399.78 MHz;  $^{13}\text{C}$ , 100.53 MHz;  $^{19}\text{F}$ , 376.17 MHz;  $^{11}\text{B}$ , 128.27 MHz), Varian Mercury-400 ( $^1\text{H}$ , 399.97 MHz;  $^{31}\text{P}$ , 161.10 MHz), Bruker AV500 ( $^1\text{H}$ , 500.23 MHz;  $^{31}\text{P}$ , 202.50 MHz;  $^{13}\text{C}$ , 125.77 MHz), Bruker Avance 600 ( $^1\text{H}$ , 600.1 MHz;  $^{13}\text{C}$ , 150.9 MHz;  $^{19}\text{F}$ , 564.6 MHz;  $^{31}\text{P}$ , 242.9 MHz) or a Varian VNMRS-700 ( $^1\text{H}$ , 699.73 MHz;  $^{13}\text{C}$ , 175.95 MHz;  $^{31}\text{P}$ , 279.89 MHz) spectrometer using  $\text{CDCl}_3$  or  $\text{CD}_2\text{Cl}_2$  as the solvent. Chemical shifts were determined relative to internal residual solvent signals ( $^1\text{H}$ ,  $\delta = 7.26$  ppm, 5.32 ppm;  $^{13}\text{C}$ ,  $\delta = 77.2$  ppm, 54.2 ppm) or external 85%  $\text{H}_3\text{PO}_4$  ( $^{31}\text{P}$ ,  $\delta = 0.0$  ppm).<sup>5</sup> FT-IR spectra were measured on an Agilent Technologies Cary 660 spectrometer or a Nicolet Avatar 360 spectrometer from solutions in  $\text{CH}_2\text{Cl}_2$  in a thin layer cell fitted with  $\text{CaF}_2$  windows. ESI-MS and APCI-MS were recorded on a Waters LCT Premier XE mass spectrometer in positive or negative ion mode from solutions in methanol. MALDI-MS were recorded using an Autoflex II TOF / TOF mass spectrometer (Bruker Daltonik, GmbH) equipped with a 337 nm laser. Cyclic voltammetry was carried out using Autolab PGSTAT 30 or Princeton Applied Research Versastat 3 potentiostats, with a platinum disc working electrode, a platinum wire counter electrode and a platinum wire pseudo-reference electrode from solutions in  $\text{CH}_2\text{Cl}_2$  containing 0.1 M  $[\text{N}^n\text{Bu}_4]\text{PF}_6$  as the electrolyte. Potentials are reported vs. ferrocene / ferrocenium ( $[\text{FeCp}_2] / [\text{FeCp}_2]^+ = 0$  V)<sup>6</sup> using a decamethylferrocene / decamethylferrocenium internal standard ( $[\text{FeCp}^*_2] / [\text{FeCp}^*_2]^+ = -0.48$  V).

## S1. Synthesis of characterisation of *mono*-vinylidene complexes

### S1.1 Synthesis of *trans*-[RuCl(=C=CHC<sub>6</sub>H<sub>4</sub>-4-NO<sub>2</sub>)(dppm)<sub>2</sub>]BF<sub>4</sub> [1a]BF<sub>4</sub>

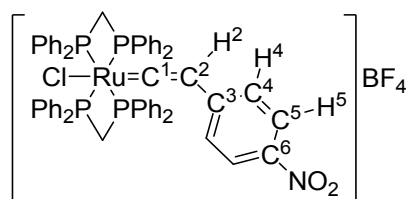

A mixture of *cis*-[RuCl<sub>2</sub>(dppm)<sub>2</sub>] (0.050 g, 0.05 mmol), TIBF<sub>4</sub> (0.016 g, 0.05 mmol) and HC≡CC<sub>6</sub>H<sub>4</sub>-4-NO<sub>2</sub> (0.0082 g, 0.05 mmol) in CH<sub>2</sub>Cl<sub>2</sub> (5 ml) was stirred under N<sub>2</sub> for two hours. The solution colour changed from yellow to red and a white solid (TiCl) precipitated. The TiCl was removed by filtration through a HPLC Teflon filter (20 μm pores) and the filtrate concentrated to *ca.* 1 ml by rotary evaporation. Excess diethyl ether was then added to the red solution, resulting in the instantaneous precipitation of a red solid which was collected by filtration, washed with diethyl ether (3 × 10 ml) and hexanes (3 × 10 ml), and then dried in air (0.049 g, 80 %).

IR (CH<sub>2</sub>Cl<sub>2</sub>, cm<sup>-1</sup>): 1635 ν(Ru=C=C), 1550 ν(N=O), 1340 ν(N-O). <sup>1</sup>H NMR (CDCl<sub>3</sub>, 400 MHz) δ / ppm: 3.36 (quin., J<sub>HP</sub> = 3 Hz, 1H, H<sup>2</sup>), 5.21 (dt, J<sub>HP</sub> = 16 Hz, J<sub>HH</sub> = 5 Hz, 2H, CH<sub>2</sub>, dppm), 5.42 (dt, J<sub>HP</sub> = 16 Hz, J<sub>HH</sub> = 5 Hz, 2H, CH<sub>2</sub>, dppm), 5.65 (d, J<sub>HH</sub> = 8 Hz, 2H, H<sup>4</sup>), 7.23 (t, J<sub>HH</sub> = 8 Hz, 8H, H<sub>m</sub>, dppm), 7.25 (t, J<sub>HH</sub> = 8 Hz, 8H, H<sub>m</sub>, dppm), 7.31 – 7.38 (m, 8H, H<sub>o</sub>, dppm), 7.42 (t, J<sub>HH</sub> = 8 Hz, 4H, H<sub>p</sub>, dppm), 7.45 (d, J<sub>HH</sub> = 8 Hz, 2H, H<sup>5</sup>), 7.44 – 7.50 (m, 12H, H<sub>o</sub> and H<sub>p</sub>, dppm). <sup>31</sup>P{<sup>1</sup>H} NMR (CDCl<sub>3</sub>, 400 MHz) δ / ppm: – 17.3 (s, Ru(dppm)<sub>2</sub>). <sup>19</sup>F NMR (CDCl<sub>3</sub>, 400 MHz) δ / ppm: – 155.3 (s, BF<sub>4</sub>). <sup>13</sup>C{<sup>1</sup>H} NMR (CD<sub>2</sub>Cl<sub>2</sub>, 400 MHz) δ / ppm: 46.2 (t, J<sub>CP</sub> = 12 Hz, CH<sub>2</sub>, dppm), 110.4 (s, C<sup>2</sup>), 124.2 (s, C<sup>5</sup>), 127.2 (s, C<sup>4</sup>), 128.8 (s, C<sub>m</sub>, dppm), 129.4 (s, C<sub>m</sub>, dppm), 131.6 (s, C<sub>p</sub>, dppm), 131.8 (s, C<sub>p</sub>, dppm), 132.4 (quin., J<sub>CP</sub> = 13 Hz, C<sub>i</sub>, dppm), 132.7 (s, C<sub>o</sub>, dppm), 133.5 (quin., J<sub>CP</sub> = 13 Hz, C<sub>i</sub>, dppm), 133.6 (s, C<sub>o</sub>, dppm), 136.2 (s, C<sup>3</sup>), 145.8 (s, C<sup>6</sup>), 352.5 (quin., J<sub>CP</sub> = 14 Hz, C<sup>1</sup>). ASAP (+)-MS (*m/z*): 1052 [RuCl(=C=CHC<sub>6</sub>H<sub>4</sub>-4-NO<sub>2</sub>)(dppm)<sub>2</sub>]<sup>+</sup>. Anal. Found: C, 60.94; H, 4.28; N, 1.34. Calc. for C<sub>58</sub>H<sub>49</sub>BClF<sub>4</sub>NO<sub>2</sub>P<sub>4</sub>Ru: C, 61.10; H, 4.34; N, 1.23.

## S1.2 Synthesis of *trans*-[RuCl(=C=CHC<sub>6</sub>H<sub>4</sub>-4-COOMe)(dppm)<sub>2</sub>]BF<sub>4</sub> [1b]BF<sub>4</sub>

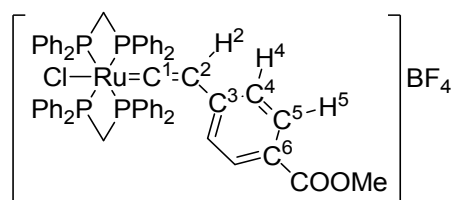

A mixture of *cis*-[RuCl<sub>2</sub>(dppm)<sub>2</sub>] (0.050 g, 0.05 mmol), TIBF<sub>4</sub> (0.016 g, 0.05 mmol) and HC≡CC<sub>6</sub>H<sub>4</sub>-4-COOMe (0.0087 g, 0.05 mmol) in CH<sub>2</sub>Cl<sub>2</sub> (5 ml) was stirred under N<sub>2</sub> for one hour. The solution colour changed from yellow to orange / brown and a white solid (TiCl) precipitated. The TiCl was removed by filtration through a HPLC Teflon filter (20 μm pores) and the filtrate concentrated to *ca.* 1 ml by rotary evaporation. Excess diethyl ether was then added to the orange / brown solution, resulting in the instantaneous precipitation of a pale brown solid which was collected by filtration, washed with diethyl ether (3 × 10 ml) and hexanes (3 × 10 ml), and then dried in air (0.046 g, 75 %).

IR (CH<sub>2</sub>Cl<sub>2</sub>, cm<sup>-1</sup>): 1717 ν(C=O), 1635 ν(Ru=C=C). <sup>1</sup>H NMR (CD<sub>2</sub>Cl<sub>2</sub>, 700 MHz) δ / ppm: 3.13 (quin., J<sub>HP</sub> = 3 Hz, 1H, H<sup>2</sup>), 3.90 (s, 3H, CH<sub>3</sub>), 5.14 (dt, J<sub>HP</sub> = 15 Hz, J<sub>HH</sub> = 5 Hz, 2H, CH<sub>2</sub>, dppm), 5.36 (dt, J<sub>HP</sub> = 15 Hz, J<sub>HH</sub> = 5 Hz, CH<sub>2</sub>, dppm), 5.58 (d, J<sub>HH</sub> = 8 Hz, 2H, H<sup>4</sup>), 7.25 (t, J<sub>HH</sub> = 7 Hz, 16H, H<sub>m</sub>, dppm), 7.31 – 7.36 (m, 8H, H<sub>o</sub>, dppm), 7.40 – 7.46 (m, 16H, H<sub>o</sub> and H<sub>p</sub>, dppm), 7.41 (d<sub>HH</sub>, J = 8 Hz, 2H, H<sup>5</sup>). <sup>11</sup>B NMR (CD<sub>2</sub>Cl<sub>2</sub>, 500 MHz) δ / ppm: – 2.0 (s, BF<sub>4</sub>). <sup>19</sup>F NMR (CD<sub>2</sub>Cl<sub>2</sub>, 500 MHz) δ / ppm: – 152.5 (s, BF<sub>4</sub>). <sup>31</sup>P{<sup>1</sup>H} NMR (CDCl<sub>3</sub>, 700 MHz) δ / ppm: – 16.6 (s, Ru(dppm)<sub>2</sub>). <sup>13</sup>C{<sup>1</sup>H} NMR (CD<sub>2</sub>Cl<sub>2</sub>, 500 MHz) δ / ppm: 46.4 (t, J<sub>CP</sub> = 13 Hz, CH<sub>2</sub>, dppm), 52.6 (s, CH<sub>3</sub>), 110.7 (s, C<sup>2</sup>), 127.2 (s, C<sup>4</sup>), 128.2 (s, C<sup>3</sup>), 129.1 (t, J<sub>CP</sub> = 3 Hz, C<sub>m</sub>, dppm), 129.7 (t, J<sub>CP</sub> = 3 Hz, C<sub>m</sub>, dppm), 129.8 (quin., J<sub>CP</sub> = 12 Hz, C<sub>i</sub>, dppm), 130.2 (s, C<sup>5</sup>), 131.3 (quin., J<sub>CP</sub> = 12 Hz, C<sub>i</sub>, dppm), 132.0 (s, C<sub>p</sub>, dppm), 132.3 (s, C<sub>p</sub>, dppm), 132.6 (s, C<sup>6</sup>), 132.9 (quin., J<sub>CP</sub> = 3 Hz, C<sub>o</sub>, dppm), 133.9 (quin., J<sub>CP</sub> = 3 Hz, C<sub>o</sub>, dppm), 166.9 (s, C=O), 355.4 (quin., J<sub>CP</sub> = 14 Hz, C<sup>1</sup>). ASAP (+)-MS (*m/z*): 1065 [RuCl(=C=CHC<sub>6</sub>H<sub>4</sub>-4-COOMe)(dppm)<sub>2</sub>]<sup>+</sup>, 521 [RuCl(dppm)]<sup>+</sup>. A satisfactory elemental analysis was not obtained.

### S1.3 Synthesis of *trans*-[RuCl(=C=CHC<sub>6</sub>H<sub>4</sub>-4-C≡CSiMe<sub>3</sub>)(dppm)<sub>2</sub>]BF<sub>4</sub> [1c]BF<sub>4</sub>

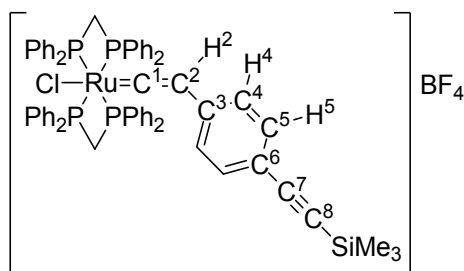

A mixture of *cis*-[RuCl<sub>2</sub>(dppm)<sub>2</sub>] (0.049 g, 0.05 mmol), TIBF<sub>4</sub> (0.016 g, 0.06 mmol) and HC≡CC<sub>6</sub>H<sub>4</sub>-4-C≡CSiMe<sub>3</sub> (0.011 g, 0.06 mmol) in CH<sub>2</sub>Cl<sub>2</sub> (5 ml) was stirred under N<sub>2</sub> for two hours. The solution colour changed from yellow to brown and a white solid (TiCl) precipitated. The TiCl was removed by filtration through a HPLC Teflon filter (20 μm pores) and the filtrate concentrated to *ca.* 1 ml by rotary evaporation. Excess diethyl ether was then added to the brown solution, resulting in the instantaneous precipitation of a brown solid which was collected by filtration, washed with diethyl ether (3 × 10 ml) and hexanes (3 × 10 ml), and then dried in air (0.041 g, 66 %).

IR (CH<sub>2</sub>Cl<sub>2</sub>, cm<sup>-1</sup>): 1605 ν(Ru=C=C). <sup>1</sup>H NMR (CDCl<sub>3</sub>, 600 MHz) δ / ppm: 0.25 (s, 9H, SiMe<sub>3</sub>), 3.00 (quin., J<sub>HP</sub> = 3 Hz, 1H, H<sup>2</sup>), 5.14 (dt, J<sub>HP</sub> = 15 Hz, J<sub>HH</sub> = 4 Hz, 2H, CH<sub>2</sub>, dppm), 5.42 (dt, J<sub>HP</sub> = 15 Hz, J<sub>HH</sub> = 4 Hz, 2H, CH<sub>2</sub>, dppm), 5.43 (d, J<sub>HH</sub> = 8 Hz, 2H, H<sup>4</sup>), 6.82 (d, J<sub>HH</sub> = 8 Hz, 2H, H<sup>5</sup>), 7.21 (t, J<sub>HH</sub> = 8 Hz, 8H, H<sub>m</sub>, dppm), 7.22 (t, J<sub>HH</sub> = 8 Hz, 8H, H<sub>m</sub>, dppm), 7.32 – 7.35 (m, 8H, H<sub>o</sub>, dppm), 7.35 (t, J<sub>HH</sub> = 8 Hz, 4H, H<sub>p</sub>, dppm), 7.38 – 7.44 (m, 12H, H<sub>o</sub> and H<sub>p</sub>, dppm). <sup>31</sup>P{<sup>1</sup>H} NMR (CDCl<sub>3</sub>, 600 MHz) δ / ppm: – 16.3 (s, Ru(dppm)<sub>2</sub>). <sup>13</sup>C{<sup>1</sup>H} NMR (CDCl<sub>3</sub>, 600 MHz) δ / ppm: 0.19 (s, SiMe<sub>3</sub>), 46.2 (quin., J<sub>CP</sub> = 13 Hz, CH<sub>2</sub>, dppm), 94.6 (s, C<sup>8</sup>), 105.0 (s, C<sup>7</sup>), 110.1 (s, C<sup>2</sup>), 120.5 (s, C<sup>3</sup>), 126.9 (s, C<sup>4</sup>), 127.7 (s, C<sup>6</sup>), 128.7 (s, C<sub>m</sub>, dppm), 129.3 (s, C<sub>m</sub>, dppm), 129.6 (quin., J<sub>CP</sub> = 13 Hz, C<sub>i</sub>, dppm), 131.1 (quin., J<sub>CP</sub> = 13 Hz, C<sub>i</sub>, dppm), 131.4 (s, C<sub>p</sub>, dppm), 131.7 (s, C<sub>p</sub>, dppm), 132.1 (s, C<sup>5</sup>), 132.7 (s, C<sub>o</sub>, dppm), 133.6 (s, C<sub>o</sub>, dppm), 355.9 – 356.1 (m, C<sup>1</sup>). ESI (+)-MS (*m/z*): 1103 [RuCl(=C=CHC<sub>6</sub>H<sub>4</sub>-4-C≡CSiMe<sub>3</sub>)(dppm)<sub>2</sub>]<sup>+</sup>, 905 [Ru(dppm)<sub>2</sub>]<sup>+</sup>. A satisfactory elemental analysis was not obtained.

### S1.4 Synthesis of *trans*-[RuCl(=C=CHC<sub>6</sub>H<sub>5</sub>)(dppm)<sub>2</sub>]BF<sub>4</sub> [1d]BF<sub>4</sub>

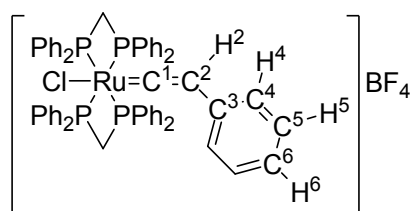

A mixture of *cis*-[RuCl<sub>2</sub>(dppm)<sub>2</sub>] (0.050 g, 0.05 mmol), TlBF<sub>4</sub> (0.016 g, 0.05 mmol) and HC≡CC<sub>6</sub>H<sub>5</sub> (6 μL, 0.06 mmol) in CH<sub>2</sub>Cl<sub>2</sub> (5 ml) was stirred under N<sub>2</sub> for one hour. The solution colour changed from yellow to orange and a white solid (TlCl) precipitated. The TlCl was removed by filtration through a HPLC Teflon filter (20 μm pores) and the filtrate concentrated to *ca.* 1 ml by rotary evaporation. Excess diethyl ether was then added to the orange / brown solution, resulting in the instantaneous precipitation of a pale yellow / brown solid which was collected by filtration, washed with diethyl ether (3 × 10 ml) and hexanes (3 × 10 ml), and then dried in air (0.047 g, 82 %).

IR (CH<sub>2</sub>Cl<sub>2</sub>, cm<sup>-1</sup>): 1605 ν(Ru=C=C). <sup>1</sup>H NMR (CD<sub>2</sub>Cl<sub>2</sub>, 400 MHz) δ / ppm: 3.10 (quin., J<sub>HP</sub> = 3 Hz, 1H, H<sup>2</sup>), 5.03 – 5.10 (m, 2H, CH<sub>2</sub>, dppm), 5.11 – 5.18 (m, 2H, CH<sub>2</sub>, dppm), 5.56 (d, J<sub>HH</sub> = 8 Hz, 2H, H<sup>4</sup>), 6.79 (t, J<sub>HH</sub> = 8 Hz, 2H, H<sup>5</sup>), 6.92 (t, J<sub>HH</sub> = 8 Hz, 1H, H<sup>6</sup>), 7.22 – 7.32 (m, 16H, H<sub>m</sub>, dppm), 7.32 – 7.42 (m, 16H, H<sub>o</sub>, dppm), 7.48 (t, J<sub>HH</sub> = 8 Hz, 8H, H<sub>p</sub>, dppm). <sup>19</sup>F NMR (CD<sub>2</sub>Cl<sub>2</sub>, 400 MHz) δ / ppm: – 152.8 (s, BF<sub>4</sub>). <sup>31</sup>P{<sup>1</sup>H} NMR (CD<sub>2</sub>Cl<sub>2</sub>, 400 MHz) δ / ppm: – 15.4 (s, Ru(dppm)<sub>2</sub>). <sup>13</sup>C{<sup>1</sup>H} NMR (CD<sub>2</sub>Cl<sub>2</sub>, 400 MHz) δ / ppm: 46.7 (t, J<sub>CP</sub> = 12 Hz, CH<sub>2</sub>, dppm), 111.1 (s, C<sup>2</sup>), 126.9 (s, C<sup>3</sup>), 127.9 (s, C<sup>4</sup>), 129.5 (s, C<sub>m</sub>, dppm), 130.0 (s, C<sub>m</sub>, dppm), 131.3 – 131.8 (m, C<sub>i</sub>, dppm), 132.14 (s, C<sup>6</sup>), 132.4 (s, C<sup>5</sup>), 132.3 (s, C<sub>p</sub>, dppm), 132.7 (s, C<sub>p</sub>, dppm), 132.9 (s, C<sub>o</sub>, dppm), 134.0 (s, C<sub>o</sub>, dppm), 358.2 (quin., J<sub>CP</sub> = 13 Hz, C<sup>1</sup>). ESI (+)-MS (*m/z*): 1007 [RuCl(=C=CHC<sub>6</sub>H<sub>5</sub>)(dppm)<sub>2</sub>]<sup>+</sup>. ESI (–)-MS (*m/z*): 87 [BF<sub>4</sub>]<sup>–</sup>. Anal. Found: C, 63.01; H, 4.55. Calc. for C<sub>58</sub>H<sub>50</sub>BClF<sub>4</sub>P<sub>4</sub>Ru: C, 63.67; H, 4.52.

### S1.5 Synthesis of *trans*-[RuCl(=C=CHC<sub>6</sub>H<sub>4</sub>-4-Me)(dppm)<sub>2</sub>]BF<sub>4</sub> [1e]BF<sub>4</sub>

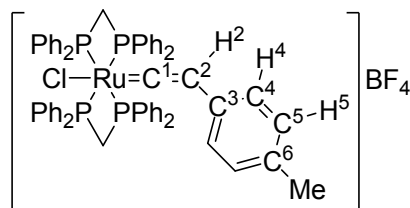

A mixture of *cis*-[RuCl<sub>2</sub>(dppm)<sub>2</sub>] (0.047 g, 0.05 mmol), TIBF<sub>4</sub> (0.015 g, 0.05 mmol) and HC≡CC<sub>6</sub>H<sub>4</sub>-4-Me (7 μL, 0.06 mmol) in CH<sub>2</sub>Cl<sub>2</sub> (5 ml) was stirred under N<sub>2</sub> for one hour. The solution colour changed from yellow to orange and a white solid (TiCl) precipitated. The TiCl was removed by filtration through a HPLC Teflon filter (20 μm pores) and the filtrate concentrated to *ca.* 1 ml by rotary evaporation. Excess diethyl ether was then added to the orange / brown solution, resulting in the instantaneous precipitation of a pale orange / brown solid which was collected by filtration, washed with diethyl ether (3 × 10 ml) and hexanes (3 × 10 ml), and then dried in air (0.046 g, 83 %).

IR (CH<sub>2</sub>Cl<sub>2</sub>, cm<sup>-1</sup>): 1646 ν(Ru=C=C). <sup>1</sup>H NMR (CDCl<sub>3</sub>, 400 MHz) δ / ppm: 2.16 (s, 3H, CH<sub>3</sub>), 2.94 (quin., J<sub>HP</sub> = 3 Hz, 1H, C=CH), 5.11 (dt, J<sub>HP</sub> = 15 Hz, J<sub>HH</sub> = 5 Hz, 2H, CH<sub>2</sub>, dppm), 5.41 (dt, J<sub>HP</sub> = 15 Hz, J<sub>HH</sub> = 5 Hz, 2H, CH<sub>2</sub>, dppm), 5.36 (d, J<sub>HH</sub> = 8 Hz, 2H, H<sup>4</sup>), 6.50 (d, J<sub>HH</sub> = 8 Hz, 2H, H<sup>5</sup>), 7.12 – 7.26 (m, 16H, H<sub>m</sub>, dppm), 7.26 – 7.37 (m, 16H, H<sub>o</sub>, dppm), 7.37 – 7.45 (m, 8H, H<sub>p</sub>, dppm). <sup>19</sup>F NMR (CDCl<sub>3</sub>, 400 MHz) δ / ppm: -152.4 (s, BF<sub>4</sub>). <sup>31</sup>P{<sup>1</sup>H} NMR (CDCl<sub>3</sub>, 400 MHz) δ / ppm: -15.9 (s, dppm). <sup>13</sup>C{<sup>1</sup>H} NMR (CD<sub>2</sub>Cl<sub>2</sub>, 500 MHz) δ / ppm: 21.2 (s, CH<sub>3</sub>), 46.5 (t, J<sub>CP</sub> = 12 Hz, CH<sub>2</sub>, dppm), 110.6 (s, C<sup>2</sup>), 123.8 (s, C<sup>3</sup>), 127.6 (s, C<sup>4</sup>), 129.2 (t, J<sub>CP</sub> = 3 Hz, C<sub>m</sub>, dppm), 129.8 (t, J<sub>CP</sub> = 3 Hz, C<sub>m</sub>, dppm), 129.6 (s, C<sup>5</sup>), 130.4 (quin., J<sub>CP</sub> = 13 Hz, C<sub>i</sub>, dppm), 131.6 (quin., J<sub>CP</sub> = 13 Hz, C<sub>i</sub>, dppm), 132.0 (s, C<sub>p</sub>, dppm), 132.3 (s, C<sub>p</sub>, dppm), 133.2 (quin., J<sub>CP</sub> = 3 Hz, C<sub>o</sub>, dppm), 134.1 (quin., J<sub>CP</sub> = 3 Hz, C<sub>o</sub>, dppm), 136.6 (s, C<sup>6</sup>), 359.5 (quin., J<sub>CP</sub> = 15 Hz, C<sup>1</sup>). ASAP (+)-MS (m/z): 1021 [RuCl(=C=CHC<sub>6</sub>H<sub>4</sub>-4-Me)(dppm)<sub>2</sub>]<sup>+</sup>. Anal. Found: C, 62.65; H, 4.28. Calc. for C<sub>59</sub>H<sub>52</sub>BClF<sub>4</sub>P<sub>4</sub>Ru: C, 63.89; H, 4.73.



### S1.6 Synthesis of *trans*-[RuCl(=C=CHC<sub>6</sub>H<sub>4</sub>-4-OMe)(dppm)<sub>2</sub>]BF<sub>4</sub> [1f]BF<sub>4</sub>

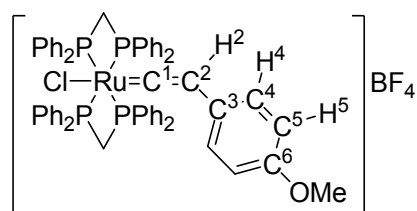

A mixture of *cis*-[RuCl<sub>2</sub>(dppm)<sub>2</sub>] (0.050 g, 0.05 mmol), TlBF<sub>4</sub> (0.016 g, 0.05 mmol) and HC≡CC<sub>6</sub>H<sub>4</sub>-4-OMe (7 μL, 0.05 mmol) in CH<sub>2</sub>Cl<sub>2</sub> (5 ml) was stirred under N<sub>2</sub> for one hour. The solution colour changed from yellow to orange and a white solid (TlCl) precipitated. The TlCl was removed by filtration through a HPLC Teflon filter (20 μm pores) and the filtrate concentrated to *ca.* 1 ml by rotary evaporation. Excess diethyl ether was then added to the orange / brown solution, resulting in the instantaneous precipitation of a pale yellow / brown solid which was collected by filtration, washed with diethyl ether (3 × 10 ml) and hexanes (3 × 10 ml), and then dried in air (0.050 g, 83 %).

IR (CH<sub>2</sub>Cl<sub>2</sub>, cm<sup>-1</sup>): 1653 ν(Ru=C=C). <sup>1</sup>H NMR (CD<sub>2</sub>Cl<sub>2</sub>, 500 MHz) δ / ppm: 3.05 – 3.12 (m, 1H, H<sup>2</sup>), 3.71 (s, 3H, CH<sub>3</sub>), 5.09 (dt, J<sub>HP</sub> = 16 Hz, J<sub>HH</sub> = 4 Hz, 2H, CH<sub>2</sub>, dppm), 5.16 (dt, J = 16 Hz, J<sub>HH</sub> = 4 Hz, 2H, CH<sub>2</sub>, dppm), 5.49 (d, J<sub>HH</sub> = 8 Hz, 2H, H<sup>4</sup>), 6.35 (d, J<sub>HH</sub> = 8 Hz, 2H, H<sup>5</sup>), 7.24 – 7.32 (m, 16H, H<sub>m</sub>, dppm), 7.33 – 7.41 (m, 16H, H<sub>o</sub>, dppm), 7.45 – 8.41 (m, 8H, H<sub>p</sub>, dppm). <sup>11</sup>B NMR (CD<sub>2</sub>Cl<sub>2</sub>, 400 MHz) δ / ppm: – 2.0 (s, BF<sub>4</sub>). <sup>19</sup>F NMR (CD<sub>2</sub>Cl<sub>2</sub>, 400 MHz) δ / ppm: – 152.6 (s, BF<sub>4</sub>). <sup>31</sup>P{<sup>1</sup>H} NMR (CD<sub>2</sub>Cl<sub>2</sub>, 500 MHz) δ / ppm: – 15.9 (s, Ru(dppm)<sub>2</sub>). <sup>13</sup>C{<sup>1</sup>H} NMR (CD<sub>2</sub>Cl<sub>2</sub>, 500 MHz) δ / ppm: 46.7 (t, J<sub>CP</sub> = 13 Hz, CH<sub>2</sub>, dppm), 56.0 (s, CH<sub>3</sub>), 110.5 (s, C<sup>2</sup>), 114.7 (s, C<sup>5</sup>), 118.7 (s, C<sup>3</sup>), 129.2 (s, C<sup>4</sup>), 129.6 (t, J = 3 Hz, C<sub>m</sub>, dppm), 130.2 (t, J = 3 Hz, C<sub>m</sub>, dppm), 130.8 (quin., J<sub>CP</sub> = 13 Hz, C<sub>i</sub>, dppm), 132.2 (quin., J<sub>CP</sub> = 13 Hz C<sub>i</sub>, dppm), 132.7 (s, C<sub>p</sub>, dppm), 133.0 (s, C<sub>p</sub>, dppm), 133.6 (quin., J<sub>CP</sub> = 3 Hz, C<sub>o</sub>, dppm), 134.5 (quin., J<sub>CP</sub> = 3 Hz, C<sub>o</sub>, dppm), 158.8 (s, C<sup>6</sup>), 362.5 – 362.6 (m, C<sup>1</sup>). ASAP (+)-MS (*m/z*): 1037 [RuCl(=C=CHC<sub>6</sub>H<sub>4</sub>-4-OMe)(dppm)<sub>2</sub>]<sup>+</sup>. Anal. Found: C, 62.90; H, 4.57. Calc. for C<sub>59</sub>H<sub>52</sub>BClF<sub>4</sub>OP<sub>4</sub>Ru: C, 62.98; H, 4.66.

## S2. Synthesis of Ruthenium *mono*-Alkynyl Complexes

### S2.1 Synthesis of *trans*-[RuCl(C≡CC<sub>6</sub>H<sub>4</sub>-4-NO<sub>2</sub>)(dppm)<sub>2</sub>] [2a]

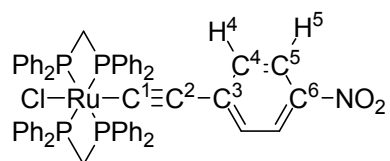

A mixture of *cis*-[RuCl<sub>2</sub>(dppm)<sub>2</sub>] (0.050 g, 0.05 mmol), TIBF<sub>4</sub> (0.016 g, 0.05 mmol) and HC≡CC<sub>6</sub>H<sub>4</sub>-4-NO<sub>2</sub> (0.0083 g, 0.05 mmol) in CH<sub>2</sub>Cl<sub>2</sub> (5 ml) was stirred under N<sub>2</sub> for two hour. The solution colour changed from yellow to red and a white solid (TiCl) precipitated. The solution was then transferred, via cannula filtration (– TiCl), into a separate dry degassed flask containing 1,8-*bis*-dimethylaminonaphthalene (Proton Sponge) (0.046 g, 0.21 mmol) in CH<sub>2</sub>Cl<sub>2</sub> (2 ml), where the red solution colour darkened instantly. The solution was stirred for a further ten minutes, then filtered through celite to remove reaction salts. The red filtrate is concentrated to *ca.* 0.5 ml by rotary evaporation then excess hexanes added; resulting in the instantaneous precipitation of a red solid. The solid is collected by filtration, washed with hexanes (3 × 20 ml) and dried in air (0.049 g, 88 %). Crystals of the complex were obtained from CH<sub>2</sub>Cl<sub>2</sub> / hexanes layer diffusion.

IR (CH<sub>2</sub>Cl<sub>2</sub>, cm<sup>-1</sup>): 2058 ν(C≡C), 1579 ν(N=O), 1322 ν(N-O). <sup>1</sup>H NMR (CDCl<sub>3</sub>, 400 MHz) δ / ppm: 4.86 – 5.05 (m, 4H, CH<sub>2</sub>, dppm), 5.95 (d, J<sub>HH</sub> = 8 Hz, 2H, H<sup>4</sup>), 7.09 (t, J<sub>HH</sub> = 8 Hz, 8H, H<sub>m</sub>, dppm), 7.18 (t, J<sub>HH</sub> = 8 Hz, 8H, H<sub>m</sub>, dppm), 7.26 (t, J<sub>HH</sub> = 8 Hz, 4H, H<sub>p</sub>, dppm), 7.31 (t, J<sub>HH</sub> = 8 Hz, 4H, H<sub>p</sub>, dppm), 7.36 – 7.41 (m, 8H, H<sub>o</sub>, dppm), 7.42 – 7.46 (m, 8H, H<sub>o</sub>, dppm), 7.78 (d, J = 8 Hz, 2H, H<sup>5</sup>). <sup>31</sup>P{<sup>1</sup>H} NMR (CDCl<sub>3</sub>, 400 MHz) δ / ppm: – 7.1 (s, Ru(dppm)<sub>2</sub>). <sup>13</sup>C{<sup>1</sup>H} NMR (CDCl<sub>3</sub>, 500 MHz) δ / ppm: 50.2, (t, J<sub>CP</sub> = 11 Hz, CH<sub>2</sub>, dppm), 115.8 (s, C<sup>2</sup>), 122.9 (s, C<sup>5</sup>), 127.7 (s, C<sub>m</sub>, dppm), 127.8 (s, C<sub>m</sub>, dppm), 129.5 (s, C<sub>p</sub>, dppm), 129.7 (s, C<sub>p</sub>, dppm), 129.8 (s, C<sup>4</sup>), 133.3 (t, J<sub>CP</sub> = 3 Hz, C<sub>o</sub>, dppm), 133.8 (t, J<sub>CP</sub> = 3 Hz, C<sub>o</sub>, dppm), 133.9 (quin., J<sub>CP</sub> = 11 Hz, C<sub>i</sub>, dppm), 134.7 (quin., J<sub>CP</sub> = 11 Hz, C<sub>i</sub>, dppm), 137.6 (s, C<sup>3</sup>), 141.9 (s, C<sup>6</sup>), 147.6 (quin., J<sub>CP</sub> = 16 Hz, C<sup>1</sup>). MALDI (+)-MS (*m/z*): 1051 [RuCl(C≡CC<sub>6</sub>H<sub>4</sub>-4-NO<sub>2</sub>)(dppm)<sub>2</sub> + H]<sup>+</sup>, 870 [Ru(dppm)<sub>2</sub>]<sup>+</sup>. Anal. Found: C, 66.30; H, 4.48; N, 1.39. Calc. for C<sub>58</sub>H<sub>48</sub>ClNO<sub>2</sub>P<sub>4</sub>Ru: C, 66.21; H, 4.60; N, 1.33.

## S2.2 Synthesis of *trans*-[RuCl(C≡CC<sub>6</sub>H<sub>4</sub>-4-COOMe)(dppm)<sub>2</sub>] [2b]

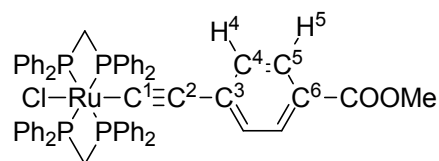

A mixture of *cis*-[RuCl<sub>2</sub>(dppm)<sub>2</sub>] (0.050 g, 0.05 mmol), TIBF<sub>4</sub> (0.017 g, 0.06 mmol) and HC≡CC<sub>6</sub>H<sub>4</sub>-4-COOMe (0.0086 g, 0.05 mmol) in CH<sub>2</sub>Cl<sub>2</sub> (5 ml) was stirred under N<sub>2</sub> for one hour. The solution colour changed from yellow to orange and a white solid (TiCl<sub>4</sub>) precipitated. The solution was then transferred, via cannula filtration (– TiCl<sub>4</sub>), into a separate dry degassed flask containing 1,8-*bis*-dimethylaminonaphthalene (Proton Sponge) (0.045 g, 0.21 mmol) in CH<sub>2</sub>Cl<sub>2</sub> (2 ml), where solution colour immediately changed from orange to yellow. The solution was stirred for a further ten minutes, then filtered through celite to remove reaction salts. The yellow filtrate is concentrated to *ca.* 0.5 ml by rotary evaporation then excess hexanes added; resulting in the instantaneous precipitation of a yellow solid. The solid is collected by filtration, washed with hexanes (3 × 20 ml) and dried in air (0.048 g, 86 %). Crystals of the complex were obtained from CH<sub>2</sub>Cl<sub>2</sub> / pentane layer diffusion.

IR (CH<sub>2</sub>Cl<sub>2</sub>, cm<sup>-1</sup>): 2073 ν(C≡C), 1705 ν(C=O), 1590 ν(C-O). <sup>1</sup>H NMR (CDCl<sub>3</sub>, 400 MHz) δ / ppm: 3.84 (s, 3H, CH<sub>3</sub>), 4.86 – 4.95 (m, 4H, CH<sub>2</sub>, dppm), 6.00 (d, J<sub>HH</sub> = 8 Hz, 2H, H<sup>4</sup>), 7.06 (t, J<sub>HH</sub> = 8 Hz, 8H, H<sub>m</sub>, dppm), 7.72 (t, J<sub>HH</sub> = 8 Hz, 8H, H<sub>m</sub>, dppm), 7.23 (t, J<sub>HH</sub> = 8 Hz, 4H, H<sub>p</sub>, dppm), 7.29 (t, J<sub>HH</sub> = 8 Hz, 4H, H<sub>p</sub>, dppm), 7.37 – 7.43 (m, 8H, H<sub>o</sub>, dppm), 7.43 – 7.49 (m, 8H, H<sub>o</sub>, dppm), 7.48 (d, J<sub>HH</sub> = 8 Hz, 2H, H<sup>5</sup>). <sup>31</sup>P {<sup>1</sup>H} NMR (CDCl<sub>3</sub>, 400 MHz) δ / ppm: – 6.8 (s, Ru(dppm)<sub>2</sub>). <sup>13</sup>C {<sup>1</sup>H} NMR (CDCl<sub>3</sub>, 600 MHz) δ / ppm: 50.4 (quin., J = 10 Hz, CH<sub>2</sub>, dppm), 51.8 (s, CH<sub>3</sub>), 113.9 (s, C<sup>2</sup>), 123.2 (s, C<sup>3</sup>), 127.7 (s, C<sub>m</sub>, dppm), 128.5 (s, C<sup>5</sup>), 129.3 (s, C<sub>p</sub>, dppm), 129.5 (s, C<sub>p</sub>, dppm), 129.9 (s, C<sup>4</sup>), 133.5 (s, C<sub>o</sub>, dppm), 133.8 (s, C<sub>o</sub>, dppm), 134.2 (quin., J<sub>CP</sub> = 10 Hz, C<sub>i</sub>, dppm), 134.9 (quin., J<sub>CP</sub> = 10 Hz, C<sub>i</sub>, dppm), 135.6 (s, C<sup>6</sup>), 144.7 – 145.0 (m, C<sup>1</sup>), 167.8 (s, C=O). MALDI (+)-MS (*m/z*): 1189 [RuCl(C≡CC<sub>6</sub>H<sub>4</sub>-4-COOMe)(dppm)<sub>2</sub> + H]<sup>+</sup>, 870 [Ru(dppm)<sub>2</sub>]<sup>+</sup>. Anal. Found: C, 62.96; H, 4.67. Calc. for C<sub>60</sub>H<sub>51</sub>ClO<sub>2</sub>P<sub>4</sub>Ru × CH<sub>2</sub>Cl<sub>2</sub>: C, 63.76; H, 4.65.

### S2.3 Synthesis of *trans*-[RuCl(C≡CC<sub>6</sub>H<sub>4</sub>C≡CSiMe<sub>3</sub>)(dppm)<sub>2</sub>] [2c]

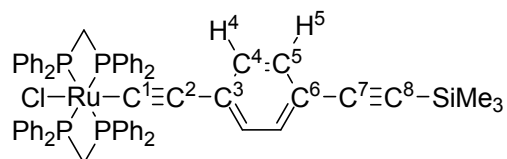

A mixture of *cis*-[RuCl<sub>2</sub>(dppm)<sub>2</sub>] (0.11 g, 0.12 mmol), TIBF<sub>4</sub> (0.035 g, 0.12 mmol) and HC≡CC<sub>6</sub>H<sub>4</sub>-4-C≡CSiMe<sub>3</sub> (0.035 g, 0.12 mmol) in CH<sub>2</sub>Cl<sub>2</sub> (5 ml) was stirred under N<sub>2</sub> for 75 minutes. The solution colour changed from yellow to orange and a white solid (TiCl) precipitated. The solution was then transferred, via cannula filtration (– TiCl), into a separate dry degassed flask containing 1,8-*bis*-dimethylaminonaphthalene (Proton Sponge) (0.088 g, 0.48 mmol) in CH<sub>2</sub>Cl<sub>2</sub> (2 ml), where solution colour immediately changed from orange to yellow. The solution was stirred for a further ten minutes, then filtered through celite to remove reaction salts. The yellow filtrate is concentrated to *ca.* 0.5 ml by rotary evaporation then excess hexanes added; resulting in the instantaneous precipitation of a yellow solid. The solid is collected by filtration, washed with hexanes (3 × 20 ml) and dried in air (0.11 g, 80 %). Crystals of the complex were obtained from CH<sub>2</sub>Cl<sub>2</sub> / MeOH layer diffusion.

IR (CH<sub>2</sub>Cl<sub>2</sub>, cm<sup>-1</sup>): 2146 ν(C≡CSiMe<sub>3</sub>), 2073 ν(C≡C). <sup>1</sup>H NMR (CD<sub>2</sub>Cl<sub>2</sub>, 700 MHz) δ / ppm: 0.23 (s, 9H, SiMe<sub>3</sub>), 4.88 – 4.98 (m, 4H, CH<sub>2</sub>, dppm), 5.95 (d, J<sub>HH</sub> = 8 Hz, 2H, H<sup>4</sup>), 6.96 (d, J<sub>HH</sub> = 8 Hz, 2H, H<sup>5</sup>), 7.04 (t, J<sub>HH</sub> = 8 Hz, 8H, H<sub>m</sub>, dppm), 7.17 (t, J<sub>HH</sub> = 8 Hz, 8H, H<sub>m</sub>, dppm), 7.21 (t, J<sub>HH</sub> = 8 Hz, 4H, H<sub>p</sub>, dppm), 7.28 (t, J<sub>HH</sub> = 8 Hz, 4H, H<sub>p</sub>, dppm), 7.36 – 7.44 (m, 8H, H<sub>o</sub>, dppm), 7.44 – 7.50 (m, 8H, H<sub>o</sub>, dppm). <sup>31</sup>P{<sup>1</sup>H} NMR (CDCl<sub>3</sub>, 400 MHz) δ / ppm: – 6.6 ppm (s, Ru(dppm)<sub>2</sub>). <sup>13</sup>C{<sup>1</sup>H} NMR (CD<sub>2</sub>Cl<sub>2</sub>, 700 MHz) δ / ppm: – 0.3 (s, SiMe<sub>3</sub>), 49.8 (t, J<sub>CP</sub> = 10 Hz, CH<sub>2</sub>, dppm), 93.2 (s, C<sup>8</sup>), 106.0 (s, C<sup>7</sup>), 112.9 (s, C<sup>2</sup>), 116.0 (s, C<sup>3</sup>), 128.3 (t, J<sub>CP</sub> = 3 Hz, C<sub>m</sub>, dppm), 128.4 (t, J<sub>CP</sub> = 3 Hz, C<sub>m</sub>, dppm), 129.9 (s, C<sub>p</sub>, dppm), 130.1 (s, C<sub>p</sub>, dppm), 130.4 (s, C<sup>4</sup>), 130.8 (quin., J<sub>CP</sub> = 15 Hz, C<sup>1</sup>), 131.1 (s, C<sup>5</sup>), 131.4 (s, C<sup>6</sup>), 134.0 (t, J<sub>CP</sub> = 3 Hz, C<sub>o</sub>, dppm), 134.3 (t, J<sub>CP</sub> = 3 Hz, C<sub>o</sub>, dppm), 135.4 (quin., J<sub>CP</sub> = 11 Hz, C<sub>i</sub>, dppm), 135.9 (quin., J<sub>CP</sub> = 11 Hz, C<sub>i</sub>, dppm). MALDI (+)-MS (*m/z*): 1102 [RuCl(C≡CC<sub>6</sub>H<sub>4</sub>-4-C≡CSiMe<sub>3</sub>)(dppm)<sub>2</sub>]<sup>+</sup>, 933 [RuCl(dppm)<sub>2</sub> + C<sub>2</sub>H<sub>4</sub>]<sup>+</sup>. Anal. Found: C, 68.51; H, 5.35. Calc. for C<sub>63</sub>H<sub>57</sub>ClP<sub>4</sub>RuSi: C, 68.59; H, 5.21.



## S2.5 Synthesis of *trans*-[RuCl(C≡CC<sub>6</sub>H<sub>4</sub>-4-Me)(dppm)<sub>2</sub>] [2e]

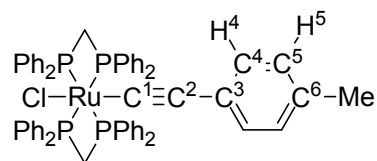

A mixture of *cis*-[RuCl<sub>2</sub>(dppm)<sub>2</sub>] (0.050 g, 0.05 mmol), TIBF<sub>4</sub> (0.016 g, 0.05 mmol) and HC≡CC<sub>6</sub>H<sub>4</sub>-4-Me (7.5 μL, 0.06 mmol) in CH<sub>2</sub>Cl<sub>2</sub> (7 ml) was stirred under N<sub>2</sub> for one hour. The solution colour changed from yellow to orange and a white solid (TiCl) precipitated. The solution was then transferred, via cannula filtration (– TiCl), into a separate dry degassed flask containing 1,8-*bis*-dimethylaminonaphthalene (Proton Sponge) (0.045 g, 0.21 mmol) in CH<sub>2</sub>Cl<sub>2</sub> (2 ml), where solution colour immediately changed from orange to yellow. The solution was stirred for a further ten minutes, then filtered through celite to remove reaction salts. The yellow filtrate is concentrated to *ca.* 0.5 ml by rotary evaporation then excess hexanes added; resulting in the instantaneous precipitation of a bright yellow solid. The solid is collected by filtration, washed with hexanes (3 × 20 ml) and dried in air (0.050 g, 92 %). Crystals suitable for single crystal X-ray diffraction were grown from CH<sub>2</sub>Cl<sub>2</sub> / pentane layer diffusion.

IR (CH<sub>2</sub>Cl<sub>2</sub>, cm<sup>-1</sup>): 2082 ν(C≡C). <sup>1</sup>H NMR (CDCl<sub>3</sub>, 400 MHz) δ / ppm: 2.20 (s, 3H, CH<sub>3</sub>), 4.86 – 4.93 (m, 4H, CH<sub>2</sub>, dppm), 6.03 (d, J<sub>HH</sub> = 8 Hz, 2H, H<sup>4</sup>), 6.71 (d, J<sub>HH</sub> = 8 Hz, 2H, H<sup>5</sup>), 7.07 (t, J<sub>HH</sub> = 8 Hz, 8H, H<sub>m</sub>, dppm), 7.17 (t, J<sub>HH</sub> = 8 Hz, 8H, H<sub>m</sub>, dppm), 7.23 (t, J<sub>HH</sub> = 8 Hz, 4H, H<sub>p</sub>, dppm), 7.27 (t, J<sub>HH</sub> = 8 Hz, 4H, H<sub>p</sub>, dppm), 7.42 – 7.54 (m, 16H, H<sub>o</sub>, dppm). <sup>31</sup>P{<sup>1</sup>H} NMR (CDCl<sub>3</sub>, 400 MHz) δ / ppm: – 6.6 (s, Ru(dppm)<sub>2</sub>). <sup>13</sup>C{<sup>1</sup>H} NMR (CDCl<sub>3</sub>, 500 MHz) δ / ppm: 21.1 (s, CH<sub>3</sub>), 50.2 (t, J<sub>CP</sub> = 10 Hz, CH<sub>2</sub>, dppm), 111.9 (s, C<sup>2</sup>), 120.4 (quin., J<sub>CP</sub> = 15 Hz, C<sup>1</sup>), 127.2 – 127.7 (m, C<sub>m</sub>, dppm), 127.6 (s, C<sup>5</sup>), 128.8 (s, C<sup>3</sup>), 129.1 (s, C<sub>p</sub>, dppm), 129.3 (s, C<sub>p</sub>, dppm), 130.0 (s, C<sup>4</sup>), 131.5 (s, C<sup>6</sup>), 133.6 (s, C<sub>o</sub>, dppm), 133.9 (s, C<sub>o</sub>, dppm), 134.6 (quin., J<sub>CP</sub> = 10 Hz, C<sub>i</sub>, dppm), 135.4 (quin., J<sub>CP</sub> = 10 Hz, C<sub>i</sub>, dppm). MALDI (+)-MS (*m/z*): 1020 [RuCl(C≡CC<sub>6</sub>H<sub>4</sub>-4-Me)(dppm)<sub>2</sub>]<sup>+</sup>, 933 [RuCl(dppm)<sub>2</sub> + C<sub>2</sub>H<sub>4</sub>]<sup>+</sup>, 905 [RuCl(dppm)<sub>2</sub>]<sup>+</sup>, 870 [Ru(dppm)<sub>2</sub>]<sup>+</sup>. Anal. Found: C, 67.87; H, 4.78. Calc. for C<sub>59</sub>H<sub>51</sub>ClP<sub>4</sub>Ru × 0.5 CH<sub>2</sub>Cl<sub>2</sub>: C, 67.22; H, 4.93.

## S2.6 Synthesis of *trans*-[RuCl(C≡CC<sub>6</sub>H<sub>4</sub>-4-OMe)(dppm)<sub>2</sub>] [2f]

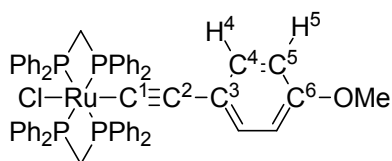

A mixture of *cis*-[RuCl<sub>2</sub>(dppm)<sub>2</sub>] (0.050 g, 0.05 mmol), TIBF<sub>4</sub> (0.017 g, 0.06 mmol) and HC≡CC<sub>6</sub>H<sub>4</sub>-4-OMe (7 μL, 0.05 mmol) in CH<sub>2</sub>Cl<sub>2</sub> (5 ml) was stirred under N<sub>2</sub> for one hour. The solution colour changed from yellow to orange and a white solid (TiCl) precipitated. The solution was then transferred, via cannula filtration (– TiCl), into a separate dry degassed flask containing 1,8-*bis*-dimethylaminonaphthalene (Proton Sponge) (0.045 g, 0.21 mmol) in CH<sub>2</sub>Cl<sub>2</sub> (2 ml), where solution colour immediately changed from orange to yellow. The solution was stirred for a further ten minutes, then filtered through celite to remove reaction salts. The yellow filtrate is concentrated to *ca.* 0.5 ml by rotary evaporation then excess hexanes added; resulting in the instantaneous precipitation of a yellow solid. The solid is collected by filtration, washed with hexanes (3 × 20 ml) and dried in air (0.041 g, 74 %). Crystals suitable for single crystal X-ray diffraction were grown from CH<sub>2</sub>Cl<sub>2</sub> / diisopropylether layer diffusion.

IR (CH<sub>2</sub>Cl<sub>2</sub>, cm<sup>-1</sup>): 2083 ν(C≡C). <sup>1</sup>H NMR (CDCl<sub>3</sub>, 400 MHz) δ / ppm: 3.72 (s, 3H, CH<sub>3</sub>), 4.85 – 4.96 (m, 4H, CH<sub>2</sub>, dppm), 6.04 (d, J<sub>HH</sub> = 8 Hz, 2H, H<sup>4</sup>), 6.40 (d, J<sub>HH</sub> = 8 Hz, 2H, H<sup>5</sup>), 7.06 (t, J<sub>HH</sub> = 8 Hz, 8H, H<sub>m</sub>, dppm), 7.16 (t, J<sub>HH</sub> = 8 Hz, 8H, H<sub>m</sub>, dppm), 7.23 (t, J<sub>HH</sub> = 8 Hz, 4H, H<sub>p</sub>, dppm), 7.27 (t, J<sub>HH</sub> = 8 Hz, 4H, H<sub>p</sub>, dppm), 7.42 – 7.52 (m, 16H, H<sub>o</sub>, dppm). <sup>31</sup>P{<sup>1</sup>H} NMR (CDCl<sub>3</sub>, 400 MHz) δ / ppm: – 6.6 (s, Ru(dppm)<sub>2</sub>). <sup>13</sup>C{<sup>1</sup>H} NMR (CDCl<sub>3</sub>, 600 MHz) δ / ppm: 55.3 (s, CH<sub>3</sub>), 50.5 (t, J<sub>CP</sub> = 11 Hz, CH<sub>2</sub>, dppm), 111.4 (s, C<sup>2</sup>), 112.6 (s, C<sup>5</sup>), 118.2 (quin., J = 15 Hz, C<sup>1</sup>), 123.8 (s, C<sup>3</sup>), 127.6 (s, C<sub>m</sub>, dppm), 127.8 (s, C<sub>m</sub>, dppm), 129.1 (s, C<sub>p</sub>, dppm), 129.4 (s, C<sub>p</sub>, dppm), 131.1 (s, C<sup>4</sup>), 133.6 – 133.7 (m, C<sub>o</sub>, dppm), 133.8 – 133.9 (m, C<sub>o</sub>, dppm), 134.6 (quin., J<sub>CP</sub> = 10 Hz, C<sub>i</sub>, dppm), 135.4 (quin., J<sub>CP</sub> = 10 Hz, C<sub>i</sub>, dppm), 155.5 (s, C<sup>6</sup>). MALDI (+)-MS (*m/z*): 1036 [RuCl(C≡CC<sub>6</sub>H<sub>4</sub>-4-OMe)(dppm)<sub>2</sub>]<sup>+</sup>, 933 [RuCl(dppm)<sub>2</sub> + C<sub>2</sub>H<sub>4</sub>]<sup>+</sup>, 905 [RuCl(dppm)<sub>2</sub>]<sup>+</sup>, 870 [Ru(dppm)<sub>2</sub>]<sup>+</sup>. Anal. Found: C, 64.53; H, 4.22. Calc. for C<sub>59</sub>H<sub>51</sub>ClO<sub>4</sub>Ru × CH<sub>2</sub>Cl<sub>2</sub>: C, 64.28; H, 4.77.

### S3. Synthesis of Ruthenium *bis*-Alkynyl Complexes

#### S3.1 Synthesis of *trans*-[Ru(C≡CC<sub>6</sub>H<sub>4</sub>NO<sub>2</sub>)<sub>2</sub>(dppm)<sub>2</sub>] [3a]

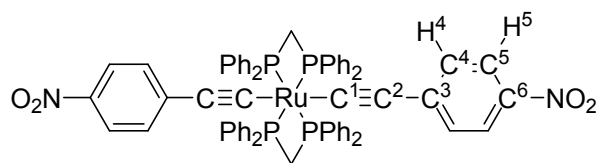

A mixture of *cis*-[RuCl<sub>2</sub>(dppm)<sub>2</sub>] (0.049 g, 0.05 mmol), TIBF<sub>4</sub> (0.032 g, 0.10 mmol), HC≡CC<sub>6</sub>H<sub>4</sub>-4-NO<sub>2</sub> (0.016 g, 0.11 mmol) and 1,8-*bis*-dimethylaminonaphthalene (Proton Sponge) (0.068 g, 0.32 mmol) in CH<sub>2</sub>Cl<sub>2</sub> (5 ml) was stirred under N<sub>2</sub> for 3.5 days. The red solution colour darkened over the reaction period and a white solid (TiCl) precipitated. The solution is then carefully concentrated to *ca.* 3 ml under high vacuum and then filtered through celite to remove TiCl and reaction salts. The red filtrate is then concentrated to dryness by rotary evaporation and purified by column chromatography on alumina (basic, oven-dried; 30 : 70 40 – 60 petroleum ether : CH<sub>2</sub>Cl<sub>2</sub>). The first red band was collected, concentrated to *ca.* 0.5 ml by rotary evaporation then excess hexanes added; resulting in the instantaneous precipitation of a dark red solid. The solid is collected by filtration, washed with hexanes (3 × 10 ml) then dried in air (0.048 g, 80 %).

IR (CH<sub>2</sub>Cl<sub>2</sub>, cm<sup>-1</sup>): 2053 ν(C≡C), 1581 ν(N=O), 1322 ν(N-O). <sup>1</sup>H NMR (CDCl<sub>3</sub>, 400 MHz) δ / ppm: 4.83 – 4.90 (m, 4H, CH<sub>2</sub>, dppm), 6.16 (d, J<sub>HH</sub> = 8 Hz, 4H, H<sup>4</sup>), 7.12 (t, J<sub>HH</sub> = 8 Hz, 16H H<sub>m</sub>, dppm), 7.30 (t, J<sub>HH</sub> = 8 Hz, 8H, H<sub>p</sub>, dppm), 7.35 – 7.45 (m, 16H, H<sub>o</sub>, dppm), 7.83 (d, J<sub>HH</sub> = 8 Hz, 4H, H<sup>5</sup>). <sup>31</sup>P{<sup>1</sup>H} NMR (CDCl<sub>3</sub>, 400 MHz) δ / ppm: – 4.1 (s, Ru(dppm)<sub>2</sub>). <sup>13</sup>C{<sup>1</sup>H} NMR (CDCl<sub>3</sub>) δ / ppm: 52.3 (t, J<sub>CP</sub> = 11 Hz, CH<sub>2</sub>, dppm), 119.0 (s, C<sup>2</sup>), 123.2 (s, C<sup>5</sup>), 127.8 (s, C<sub>m</sub>, dppm), 129.6 (s, C<sub>p</sub>, dppm), 130.0 (s, C<sup>4</sup>), 133.4 (s, C<sub>o</sub>, dppm), 135.2 (quin., J<sub>CP</sub> = 11 Hz, C<sub>i</sub>, dppm), 137.7 (s, C<sup>6</sup>), 142.7 (s, C<sup>3</sup>), 150.1 (quin., J<sub>CP</sub> = 15 Hz, C<sup>1</sup>). MALDI (+)-MS (*m/z*): 1162 [Ru(C≡CC<sub>6</sub>H<sub>4</sub>NO<sub>2</sub>)<sub>2</sub>(dppm)<sub>2</sub>]<sup>+</sup>, 870 [Ru(dppm)<sub>2</sub>]<sup>+</sup>. Anal. Found: C, 68.27; H, 4.50; N, 2.37. Calc. for C<sub>66</sub>H<sub>52</sub>N<sub>2</sub>O<sub>4</sub>P<sub>4</sub>Ru: C, 68.15; H, 4.51; N, 2.41.



### S3.2 Synthesis of *trans*-[Ru(C≡CC<sub>6</sub>H<sub>4</sub>-4-COOMe)<sub>2</sub>(dppm)<sub>2</sub>] [3b]

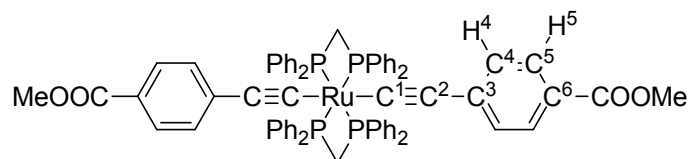

A mixture of *cis*-[RuCl<sub>2</sub>(dppm)<sub>2</sub>] (0.051 g, 0.05 mmol), TIBF<sub>4</sub> (0.032 g, 0.10 mmol), HC≡CC<sub>6</sub>H<sub>4</sub>-4-COOMe (0.019 g, 0.12 mmol) and 1,8-*bis*-dimethylaminonaphthalene (Proton Sponge) (0.069 g, 0.32 mmol) in CH<sub>2</sub>Cl<sub>2</sub> (5 ml) was stirred under N<sub>2</sub> for 36 hours. The yellow solution colour darkened over the reaction period and a white solid (TiCl) precipitated. The solution is then carefully concentrated to *ca.* 1 ml under high vacuum and then filtered through a short pad of alumina (basic, oven-dried) to remove TiCl and reaction salts. The first yellow fraction is collected, concentrated to *ca.* 0.5 ml by rotary evaporation then excess hexanes added; resulting in the instantaneous precipitation of a bright yellow solid. The solid is collected by filtration, washed with hexanes (3 × 10 ml) and diethyl ether (3 × 5 ml) then dried in air (0.038 g, 60 %). Crystals suitable for single crystal X-ray diffraction were grown from CDCl<sub>3</sub> / 40 – 60 petroleum ether layer diffusion.

IR (CH<sub>2</sub>Cl<sub>2</sub>, cm<sup>-1</sup>): 2062 ν(C≡C), 1705 ν(C=O). <sup>1</sup>H NMR (CDCl<sub>3</sub>, 400 MHz) δ / ppm: 3.79 (s, 6H, CH<sub>3</sub>), 4.74 – 4.80 (m, 4H, CH<sub>2</sub>, dppm), 6.15 (d, J<sub>HH</sub> = 8 Hz, 4H, H<sup>4</sup>), 7.02 (t, J<sub>HH</sub> = 8 Hz, 16H H<sub>m</sub>, dppm), 7.18 (t, J<sub>HH</sub> = 8 Hz, 8H, H<sub>p</sub>, dppm), 7.34 – 7.48 (m, 16H, H<sub>o</sub>, dppm), 7.55 (d, J<sub>HH</sub> = 8 Hz, 4H, H<sup>5</sup>). <sup>31</sup>P{<sup>1</sup>H} NMR (CDCl<sub>3</sub>, 400 MHz) δ / ppm: – 4.0 (s, Ru(dppm)<sub>2</sub>). <sup>13</sup>C{<sup>1</sup>H} NMR (CDCl<sub>3</sub>) δ / ppm: 51.8 (s, CH<sub>3</sub>), 52.4 (t, J<sub>CP</sub> = 10 Hz, CH<sub>2</sub>, dppm), 117.3 (s, C<sup>2</sup>), 123.5 (s, C<sup>3</sup>), 127.7 (s, C<sub>m</sub>, dppm), 128.7 (s, C<sup>5</sup>), 129.3 (s, C<sub>p</sub>, dppm), 129.8 (s, C<sup>4</sup>), 133.5 (s, C<sub>o</sub>, dppm), 135.6 (quin., J<sub>CP</sub> = 11 Hz, C<sub>i</sub>, dppm), 135.8 (s, C<sup>6</sup>), 141.1 (quin., J<sub>CP</sub> = 15 Hz, C<sup>1</sup>), 167.8 (s, C=O). MALDI (+)-MS (*m/z*): 1189 [Ru(C≡CC<sub>6</sub>H<sub>4</sub>-4-COOMe)<sub>2</sub>(dppm)<sub>2</sub> + H]<sup>+</sup>, 870 [Ru(dppm)<sub>2</sub>]<sup>+</sup>. Anal. Found: C, 70.62; H, 5.05. Calc. for C<sub>70</sub>H<sub>58</sub>O<sub>4</sub>P<sub>4</sub>Ru: C, 70.69; H, 4.92.

### S3.3 Synthesis of *trans*-[Ru(C≡CC<sub>6</sub>H<sub>4</sub>C≡CSiMe<sub>3</sub>)<sub>2</sub>(dppm)<sub>2</sub>] [3c]

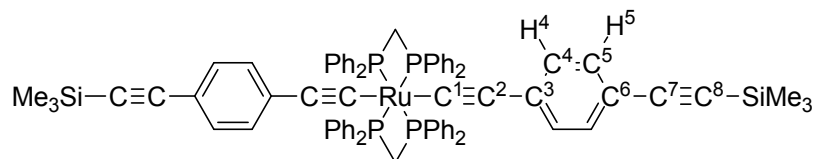

A mixture of *cis*-[RuCl<sub>2</sub>(dppm)<sub>2</sub>] (0.051 g, 0.05 mmol), TIBF<sub>4</sub> (0.032 g, 0.10 mmol), HC≡CC<sub>6</sub>H<sub>4</sub>-4-C≡CSiMe<sub>3</sub> (0.022 g, 0.11 mmol) and 1,8-*bis*-dimethylaminonaphthalene (Proton Sponge) (0.073 g, 0.34 mmol) in CH<sub>2</sub>Cl<sub>2</sub> (5 ml) was stirred under N<sub>2</sub> for 16 hours. The yellow solution colour darkened over the reaction period and a white solid (TiCl) precipitated. The solution is then carefully concentrated to *ca.* 3 ml under high vacuum and then filtered through celite to remove TiCl and reaction salts. The yellow filtrate is concentrated again to *ca.* 1 ml by rotary evaporation then excess diethyl ether added (*ca.* 10 ml); resulting in the instantaneous precipitation of a yellow solid. The mixture is left in the fridge to aid precipitation for several hours before filtering. The collected yellow solid is washed with cold diethyl ether (1 × 5 ml) and hexanes (3 × 15 ml) then dried in air (0.033 g, 48 %).

IR (CH<sub>2</sub>Cl<sub>2</sub>, cm<sup>-1</sup>): 2149 ν(C≡CSiMe<sub>3</sub>), 2058 ν(C≡C). <sup>1</sup>H NMR (CDCl<sub>3</sub>, 400 MHz) δ / ppm: 0.26 (s, 18H, SiMe<sub>3</sub>), 4.80 – 4.89 (m, 4H, CH<sub>2</sub>, dppm), 6.15 (d, J<sub>HH</sub> = 8 Hz, 4H, H<sup>4</sup>), 7.07 (d, J<sub>HH</sub> = 8 Hz, 4H, H<sup>5</sup>), 7.09 (t, J<sub>HH</sub> = 8 Hz, 16H, H<sub>m</sub>, dppm), 7.25 (t, J<sub>HH</sub> = 8 Hz, 8H, H<sub>p</sub>, dppm) 7.41 – 7.55 (m, 16H, H<sub>o</sub>, dppm). <sup>31</sup>P{<sup>1</sup>H} NMR (CDCl<sub>3</sub>, 400 MHz) δ / ppm: – 3.8 ppm (s, Ru(dppm)<sub>2</sub>). <sup>13</sup>C{<sup>1</sup>H} NMR (CDCl<sub>3</sub>, 600 MHz) δ / ppm: 0.3 (s, SiMe<sub>3</sub>), 52.4 (t, J<sub>CP</sub> = 11 Hz, CH<sub>2</sub>, dppm), 93.3 (s, C<sup>8</sup>), 106.9 (s, C<sup>7</sup>), 116.2 (s, C<sup>2</sup>), 129.4 (s, C<sup>3</sup>), 127.6 (s, C<sub>m</sub>, dppm), 129.2 (s, C<sub>p</sub>, dppm), 129.9 (s, C<sup>4</sup>), 131.0 (s, C<sup>5</sup>), 131.5 (s, C<sup>6</sup>), 133.4 – 133.6 (m, C<sub>o</sub>, dppm), 135.8 (quin., J<sub>CP</sub> = 10 Hz, C<sub>i</sub>, dppm), 136.7 – 137.0 (m, C<sup>1</sup>). ASAP (+)-MS (*m/z*): 1265 [Ru(C≡CC<sub>6</sub>H<sub>4</sub>C≡CSiMe<sub>3</sub>)<sub>2</sub>(dppm)<sub>2</sub> + H]<sup>+</sup>, 1264 [Ru(C≡CC<sub>6</sub>H<sub>4</sub>C≡CSiMe<sub>3</sub>)<sub>2</sub>(dppm)<sub>2</sub>]<sup>+</sup>, 1067 [Ru(C≡CC<sub>6</sub>H<sub>4</sub>C≡CSiMe<sub>3</sub>)(dppm)<sub>2</sub>]<sup>+</sup>, 870 [Ru(dppm)<sub>2</sub>]<sup>+</sup>. A satisfactory elemental analysis was not obtained.

## S4. Synthesis of Ruthenium $\eta^3$ -Butenynyl Complexes

### S4.1 Synthesis of *trans*-[RuCl( $\eta^3$ -{HC(C<sub>6</sub>H<sub>4</sub>-4-Me)=CC≡CC<sub>6</sub>H<sub>4</sub>-4-Me})(dppm)<sub>2</sub>][BF<sub>4</sub>][4e]BF<sub>4</sub>

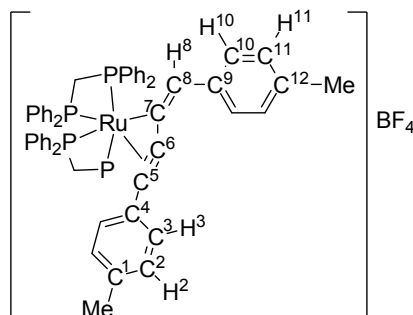

A mixture of *cis*-[RuCl<sub>2</sub>(dppm)<sub>2</sub>] (0.049 g, 0.05 mmol), TlBF<sub>4</sub> (0.032 g, 0.11 mmol), HC≡CC<sub>6</sub>H<sub>4</sub>-4-Me (14.5  $\mu$ L, 0.11 mmol) and 1,8-*bis*-dimethylaminonaphthalene (Proton Sponge) (0.066 g, 0.31 mmol) in CH<sub>2</sub>Cl<sub>2</sub> (8 ml) was stirred under N<sub>2</sub> for 40 hours. A white solid (TlCl) precipitated from the yellow solution over the reaction period. The yellow solution is concentrated carefully to half volume under high vacuum then filtered through a HPLC Teflon filter (20  $\mu$ m pores) to remove TlCl and reaction salts. To the yellow filtrate, CH<sub>2</sub>Cl<sub>2</sub> (*ca.* 5 ml) and diethyl ether (*ca.* 30 ml) are then added and left to crystallise overnight, where large yellow crystals formed round the flask. The solvent is decanted, crystals washed with diethyl ether (3  $\times$  10 ml) and hexanes (3  $\times$  10 ml) then dried in air before collection (0.042 g, 56 %). Crystals suitable for single crystal X-ray diffraction were grown from acetone / pentane layer diffusion.

IR (CH<sub>2</sub>Cl<sub>2</sub>, cm<sup>-1</sup>): 1967  $\nu$ (C≡C), 1606  $\nu$ (C=C). <sup>1</sup>H NMR (CD<sub>2</sub>Cl<sub>2</sub>, 400 MHz)  $\delta$  / ppm: 2.34 (s, 6H, CH<sub>3</sub>), 4.20 (dt, J<sub>HP</sub> = 15 Hz, J<sub>HH</sub> 11 Hz, 1H, CH<sub>2</sub>, dppm), 4.50 (dt, J<sub>HP</sub> = 15, J<sub>HH</sub> = 11 Hz, 1H, CH<sub>2</sub>, dppm), 4.93 – 5.07 (m, 2H, CH<sub>2</sub>, dppm), 5.55 (d, J<sub>HP</sub> = 5 Hz, 1H, H<sup>8</sup>), 6.18 (d<sub>HH</sub>, J = 8 Hz, 2H, H<sup>3</sup>), 6.36 – 7.76 (m, 40H, Ph, dppm), 6.85 (d, J<sub>HH</sub> = 8 Hz, 2H, H<sup>2</sup>), 7.14 (d, J<sub>HH</sub> = 8 Hz, 2H, H<sup>11</sup>), 7.29 (d, J<sub>HH</sub> = 8 Hz, 2H, H<sup>10</sup>). <sup>11</sup>B NMR (CD<sub>2</sub>Cl<sub>2</sub>, 400 MHz)  $\delta$  / ppm: – 2.1 (s, BF<sub>4</sub>). <sup>19</sup>F NMR (CD<sub>2</sub>Cl<sub>2</sub>, 400 MHz)  $\delta$  / ppm: – 149.9 (s, BF<sub>4</sub>). <sup>31</sup>P{<sup>1</sup>H} NMR (CDCl<sub>3</sub>, 400 MHz)  $\delta$  / ppm: – 27.2 (ddd, J<sub>PP</sub> = 318, 49, 27 Hz, dppm), – 16.9 (ddd, J<sub>PP</sub> = 321, 42, 26 Hz, dppm), – 14.0 (ddd, J<sub>PP</sub> = 36, 27, 10 Hz, dppm), – 0.2 (ddd, J<sub>PP</sub> = 46, 26, 9 Hz, dppm). <sup>13</sup>C{<sup>1</sup>H} NMR (CD<sub>2</sub>Cl<sub>2</sub>, 400 MHz)  $\delta$  / ppm: 21.7 (s, CH<sub>3</sub>), 22.0 (s, CH<sub>3</sub>), 42.0 (t, J<sub>CP</sub> = 24 Hz, CH<sub>2</sub>, dppm), 45.2 (t, J<sub>CP</sub> = 24 Hz, CH<sub>2</sub>, dppm), 108.7 (d, J<sub>CP</sub> = 22 Hz, C<sup>5</sup>), 126.7 (s, C<sup>9</sup>), 128.9 – 139.9 (m, Ph, dppm), 129.7 (s, C<sup>2</sup>), 130.2 (s, C<sup>1</sup> or C<sup>12</sup>), 130.4 (s, C<sup>8</sup>),

131.0 (s, C<sup>3</sup>), 138.9 (s, C<sup>1</sup> or C<sup>12</sup>), 139.8 (s, C<sup>4</sup>). The resonances from quaternary C<sup>6</sup> and C<sup>7</sup> atoms were not unambiguously resolved. ESI (+)-MS (*m/z*): 1101 [RuCl( $\eta^3$ -{HC(C<sub>6</sub>H<sub>4</sub>-4-Me)=CC $\equiv$ CC<sub>6</sub>H<sub>4</sub>-4-Me})(dppm)<sub>2</sub>]<sup>+</sup>. Anal. Found: C, 68.59; H, 4.68. Calc. for C<sub>68</sub>H<sub>59</sub>BF<sub>4</sub>P<sub>4</sub>Ru: C, 68.67; H, 5.00.

**S4.2 Synthesis of *trans*-[RuCl( $\eta^3$ -{HC(C<sub>6</sub>H<sub>4</sub>-4-OMe)=CC≡CC<sub>6</sub>H<sub>4</sub>-4-OMe})(dppm)<sub>2</sub>]BF<sub>4</sub> [4f]BF<sub>4</sub>**

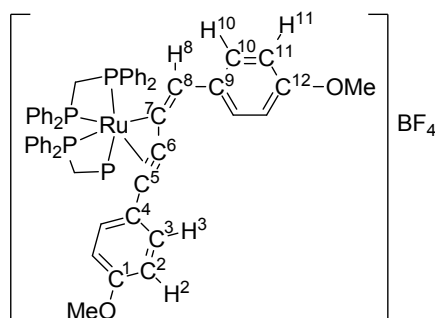

A mixture of *cis*-[RuCl<sub>2</sub>(dppm)<sub>2</sub>] (0.10 g, 0.11 mmol), TIBF<sub>4</sub> (0.065 g, 0.22 mmol), HC≡CC<sub>6</sub>H<sub>4</sub>-4-OMe (30  $\mu$ L, 0.23 mmol) and 1,8-*bis*-dimethylaminonaphthalene (Proton Sponge) (0.078 g, 0.43 mmol) in CH<sub>2</sub>Cl<sub>2</sub> (20 ml) was stirred under N<sub>2</sub> overnight. A white solid (TiCl) precipitated from the yellow solution over the reaction period. The solution was then filtered through celite to remove TiCl and reaction salts and the yellow filtrate concentrated to half volume. To the yellow solution, diethyl ether (*ca.* 30 ml) is then added and left to crystallise for several days, where large yellow crystals formed round the flask. The solvent is then decanted, crystals collected by filtration and washed with diethyl ether (3  $\times$  10 ml) and hexanes (3  $\times$  10 ml) then dried in air (0.066 g, 50 %).

IR (CH<sub>2</sub>Cl<sub>2</sub>, cm<sup>-1</sup>): 1870  $\nu$ (C≡C), 1602  $\nu$ (C=C). <sup>1</sup>H NMR (CD<sub>2</sub>Cl<sub>2</sub>, 400 MHz)  $\delta$  / ppm: 3.81 (s, 3H, CH<sub>3</sub>), 3.81 (s, 3H, CH<sub>3</sub>), 4.21 (dt, J<sub>HP</sub> = 15 Hz, J<sub>HH</sub> = 11 Hz, 1H, CH<sub>2</sub>, dppm), 4.49 (dt, J<sub>HP</sub> = 15 Hz, J<sub>HH</sub> = 11 Hz, 1H, CH<sub>2</sub>, dppm), 4.93 – 5.03 (m, 2H, CH<sub>2</sub>, dppm), 5.53 (d, J<sub>HP</sub> = 5 Hz, 1H, H<sup>8</sup>), 6.23 (d, J<sub>HH</sub> = 8 Hz, 2H, H<sup>3</sup>), 6.36 – 7.74 (m, 40H, Ph, dppm), 6.56 (d, J<sub>HH</sub> = 8 Hz, 2H, H<sup>2</sup>), 6.87 (d, J<sub>HH</sub> = 8 Hz, 2H, H<sup>11</sup>), 7.29 (d, J<sub>HH</sub> = 8 Hz, 2H, H<sup>10</sup>). <sup>11</sup>B NMR (CD<sub>2</sub>Cl<sub>2</sub>, 400 MHz)  $\delta$  / ppm: – 2.1 (s, BF<sub>4</sub>). <sup>19</sup>F NMR (CD<sub>2</sub>Cl<sub>2</sub>, 400 MHz)  $\delta$  / ppm: – 153.1 (s, BF<sub>4</sub>). <sup>31</sup>P{<sup>1</sup>H} NMR (CD<sub>2</sub>Cl<sub>2</sub>, 400 MHz)  $\delta$  / ppm: – 25.4 (ddd, J<sub>PP</sub> = 322, 48, 28 Hz, dppm), – 16.4 (ddd, J<sub>PP</sub> = 323, 32, 26 Hz, dppm), – 13.2 (ddd, J<sub>PP</sub> = 37, 23, 9 Hz, dppm), 0.69 (ddd, J<sub>PP</sub> = 48, 27, 9 Hz, dppm). <sup>13</sup>C{<sup>1</sup>H} NMR (CD<sub>2</sub>Cl<sub>2</sub>, 400 MHz)  $\delta$  / ppm: 42.2 (t, J<sub>CP</sub> = 26 Hz, CH<sub>2</sub>, dppm), 45.4 (t, J<sub>CP</sub> = 26 Hz, CH<sub>2</sub>, dppm), 56.1 (s, CH<sub>3</sub>), 56.3 (s, CH<sub>3</sub>), 108.5 (d, J<sub>CP</sub> = 22 Hz, C<sup>5</sup>), 114.8 (s, C<sup>2</sup> or C<sup>11</sup>), 114.9 (s, C<sup>2</sup> or C<sup>11</sup>), 127.7 – 133.2 (m, Ph), 130.3 (s, C<sup>8</sup>), 132.8 (s, C<sup>3</sup>), 159.8 (s, C<sup>12</sup>), 160.8 (s, C<sup>1</sup>). The resonances from quaternary C<sup>6</sup> and C<sup>7</sup> atoms were not unambiguously resolved. ESI (+)-MS (*m/z*): 1133 [RuCl( $\eta^3$ -{HC(C<sub>6</sub>H<sub>4</sub>-4-OMe)=CC≡CC<sub>6</sub>H<sub>4</sub>-4-OMe})(dppm)<sub>2</sub>]<sup>+</sup>.

## S5. Crystal Structure Analysis

The X-ray single crystal data have been collected using on a Bruker SMART CCD 6000 (fine-focused sealed tube, graphite monochromated  $\lambda\text{MoK}\alpha$  radiation,  $\lambda = 0.71073\text{\AA}$ ) and Oxford Diffraction Gemini -Ultra (compounds **2c** and **2d**: fine-focus sealed tube and Enhance MoX-ray source,  $\lambda\text{MoK}\alpha$ - and  $\lambda\text{CuK}\alpha$ -radiations, graphite monochromator and focusing mirrors,  $\lambda = 0.71073$  and  $1.54178\text{\AA}$  respectively) diffractometers. The data were collected at the temperatures 100K (**2c** and **2d**), 150K (**2e**) and 120K for the rest of the samples. The temperature was maintained by the Cryostream (Oxford Cryosystems) open-flow nitrogen cryostats. All structures were solved by direct methods and refined by full-matrix least squares on  $F^2$  for all data using Olex2<sup>8</sup> and SHELXTL<sup>7</sup> software. All non-disordered non-hydrogen atoms were refined anisotropically, the hydrogen atoms were placed in the calculated positions and refined in riding mode. Disordered atoms in structures **2b**, **2e** and **2f** were refined isotropically with fixed SOF= 0.5, 0.9:0.1 and 0.75:0.25 respectively. The structures **2b** and **2e** contain severely disordered solvent molecules which could not be modeled properly and were taken into account by MASK procedure of Olex2 program package. Crystallographic data for the structure have been deposited with the Cambridge Crystallographic Data Centre as supplementary publications CCDC-1426045-1426051.

### S5.1 Structure of [2b]

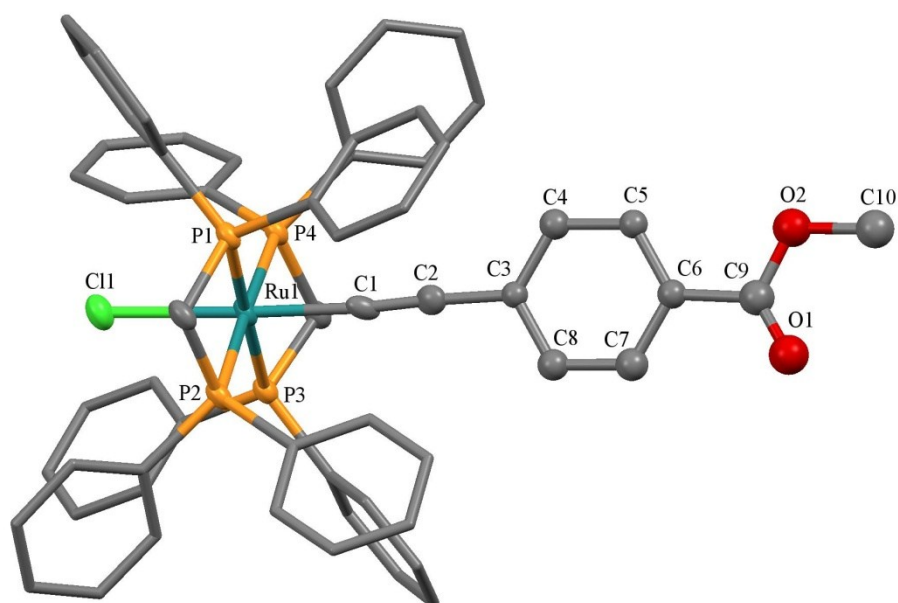

**Figure S1:** A plot of a molecule of [2b]. One set of the disordered atoms, the solvent of crystallisation and hydrogen atoms have been removed for clarity.

**Table S1:** Crystal data and structure refinement for [2b]

|                                           |                                                                                                    |
|-------------------------------------------|----------------------------------------------------------------------------------------------------|
| Empirical formula                         | C <sub>60</sub> H <sub>51</sub> ClO <sub>2</sub> P <sub>4</sub> Ru.CH <sub>2</sub> Cl <sub>2</sub> |
| Formula weight                            | 1149.33                                                                                            |
| Temperature/K                             | 120                                                                                                |
| Crystal system                            | Triclinic                                                                                          |
| Space group                               | $P\bar{1}$                                                                                         |
| $a/\text{\AA}$                            | 10.8804(4)                                                                                         |
| $b/\text{\AA}$                            | 11.4875(4)                                                                                         |
| $c/\text{\AA}$                            | 24.2218(9)                                                                                         |
| $\alpha/^\circ$                           | 103.3270(10)                                                                                       |
| $\beta/^\circ$                            | 91.8920(10)                                                                                        |
| $\gamma/^\circ$                           | 104.7960(10)                                                                                       |
| Volume/ $\text{\AA}^3$                    | 2834.62(18)                                                                                        |
| $Z$                                       | 2                                                                                                  |
| $\rho_{\text{calc}}$ mg/mm <sup>3</sup>   | 1.347                                                                                              |
| $\mu/\text{mm}^{-1}$                      | 0.572                                                                                              |
| Crystal size/mm <sup>3</sup>              | 0.31 × 0.3 × 0.24                                                                                  |
| 2 $\theta$ range for data collection      | 3.48 to 62.04°                                                                                     |
| Index ranges                              | -15 ≤ $h$ ≤ 15, -16 ≤ $k$ ≤ 16, -35 ≤ $l$ ≤ 35                                                     |
| Reflections collected                     | 53960                                                                                              |
| Independent reflections                   | 15073 [ $R(\text{int}) = 0.0345$ ]                                                                 |
| Data/restraints/parameters                | 15073/0/608                                                                                        |
| Goodness-of-fit on $F^2$                  | 1.093                                                                                              |
| Final $R$ indexes [ $I \geq 2\sigma(I)$ ] | $R_1 = 0.0490$ , $wR_2 = 0.1298$                                                                   |
| Final $R$ indexes [all data]              | $R_1 = 0.0609$ , $wR_2 = 0.1379$                                                                   |
| Largest diff. peak and hole               | 2.062 and -0.819 e. $\text{\AA}^{-3}$                                                              |



## S5.2 Structure of [2c]

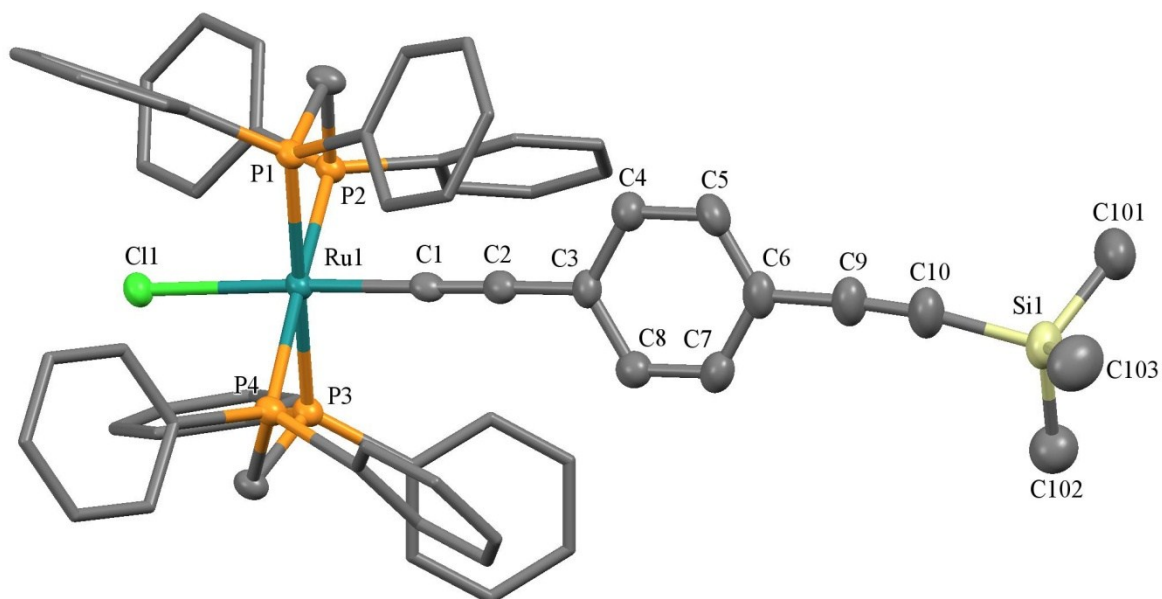

**Figure S2:** A plot of a molecule of [2c]. Solvent of crystallisation and hydrogen atoms have been removed for clarity.

**Table S2:** Crystal data and structure refinement for [2c]

|                                                     |                                                                                       |
|-----------------------------------------------------|---------------------------------------------------------------------------------------|
| Empirical formula                                   | C <sub>63</sub> H <sub>57</sub> ClP <sub>4</sub> RuSi.CH <sub>2</sub> Cl <sub>2</sub> |
| Formula weight                                      | 1187.50                                                                               |
| Temperature                                         | 100(2) K                                                                              |
| Wavelength                                          | 1.54178 Å                                                                             |
| Crystal system                                      | Monoclinic                                                                            |
| Space group                                         | <i>P</i> 2 <sub>1</sub> / <i>n</i>                                                    |
| <i>a</i> /Å                                         | 10.24630(10)                                                                          |
| <i>b</i> /Å                                         | 31.3382(3)                                                                            |
| <i>c</i> /Å                                         | 18.1430(2)                                                                            |
| β/°                                                 | 94.3440(10)                                                                           |
| Volume/Å <sup>3</sup>                               | 5808.99(10)                                                                           |
| <i>Z</i>                                            | 4                                                                                     |
| ρ <sub>calc</sub> mg/mm <sup>3</sup>                | 1.358                                                                                 |
| μ/mm <sup>-1</sup>                                  | 4.992                                                                                 |
| Crystal size/mm <sup>3</sup>                        | 0.39 x 0.070 x 0.035                                                                  |
| 2θ range for data collection                        | 5.64 to 134.616°.                                                                     |
| Index ranges                                        | -12 ≤ <i>h</i> ≤ 7, -37 ≤ <i>k</i> ≤ 35, -20 ≤ <i>l</i> ≤ 21                          |
| Reflections collected                               | 33175                                                                                 |
| Independent reflections                             | 10331 [ <i>R</i> (int) = 0.0410]                                                      |
| Data / restraints / parameters                      | 10331 / 0 / 661                                                                       |
| Goodness-of-fit on <i>F</i> <sup>2</sup>            | 1.044                                                                                 |
| Final <i>R</i> indices [ <i>I</i> > 2σ( <i>I</i> )] | <i>R</i> <sub>1</sub> = 0.0399, <i>wR</i> <sub>2</sub> = 0.0986                       |
| <i>R</i> indices (all data)                         | <i>R</i> <sub>1</sub> = 0.0503, <i>wR</i> <sub>2</sub> = 0.1059                       |
| Largest diff. peak and hole                         | 0.815 and -0.783 e.Å <sup>-3</sup>                                                    |

### S5.3 Structure of [2d]

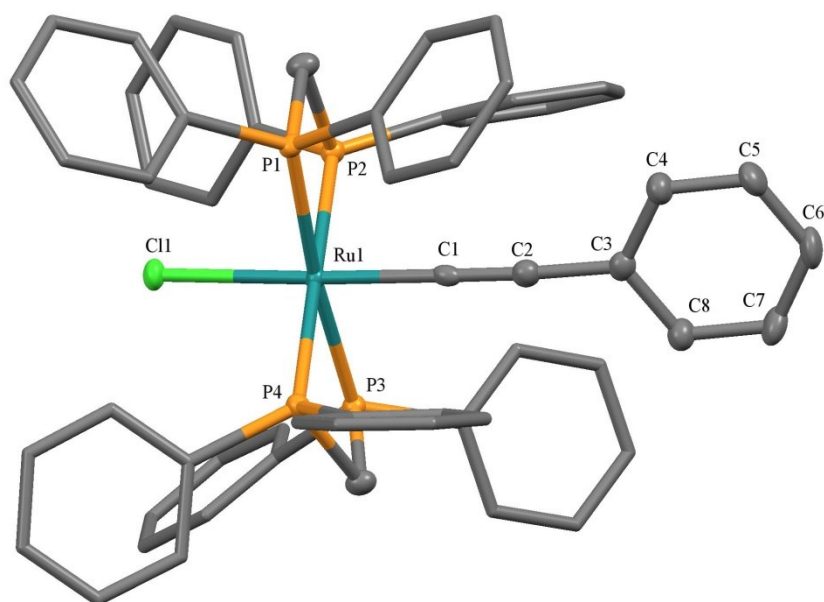

**Figure S3:** A plot of a molecule of [2d] with hydrogen atoms removed for clarity.

**Table S3:** Crystal data and structure refinement for [2d]

|                                                              |                                                                 |
|--------------------------------------------------------------|-----------------------------------------------------------------|
| Empirical formula                                            | C <sub>58</sub> H <sub>49</sub> ClP <sub>4</sub> Ru             |
| Formula weight                                               | 1006.37                                                         |
| Temperature                                                  | 100(2) K                                                        |
| Wavelength                                                   | 0.71073 Å                                                       |
| Crystal system                                               | Triclinic                                                       |
| Space group                                                  | <b>PError!</b>                                                  |
| <i>a</i> /Å                                                  | 13.5448(4)                                                      |
| <i>b</i> /Å                                                  | 13.5845(4)                                                      |
| <i>c</i> /Å                                                  | 13.8574(3)                                                      |
| $\alpha$ /°                                                  | 93.781(2)                                                       |
| $\beta$ /°                                                   | 109.044(2)                                                      |
| $\gamma$ /°                                                  | 94.896(2)                                                       |
| Volume/Å <sup>3</sup>                                        | 2389.47(12)                                                     |
| <i>Z</i>                                                     | 2                                                               |
| $\rho_{\text{calc}}$ mg/mm <sup>3</sup>                      | 1.399                                                           |
| $\mu$ /mm <sup>-1</sup>                                      | 0.557                                                           |
| Crystal size/mm <sup>3</sup>                                 | 0.45 x 0.27 x 0.17                                              |
| 2 $\theta$ range for data collection                         | 4.126 to 65.242°.                                               |
| Index ranges                                                 | -20 ≤ <i>h</i> ≤ 19, -19 ≤ <i>k</i> ≤ 20, -20 ≤ <i>l</i> ≤ 21   |
| Reflections collected                                        | 35385                                                           |
| Independent reflections                                      | 15874 [ <i>R</i> (int) = 0.0359]                                |
| Data / restraints / parameters                               | 15874 / 0 / 577                                                 |
| Goodness-of-fit on <i>F</i> <sup>2</sup>                     | 1.049                                                           |
| Final <i>R</i> indices [ <i>I</i> > 2 $\sigma$ ( <i>I</i> )] | <i>R</i> <sub>1</sub> = 0.0400, <i>wR</i> <sub>2</sub> = 0.0912 |
| <i>R</i> indices (all data)                                  | <i>R</i> <sub>1</sub> = 0.0551, <i>wR</i> <sub>2</sub> = 0.101  |
| Largest diff. peak and hole                                  | 1.385 and -0.902 e.Å <sup>-3</sup>                              |

## S5.4 Structure of [2e]

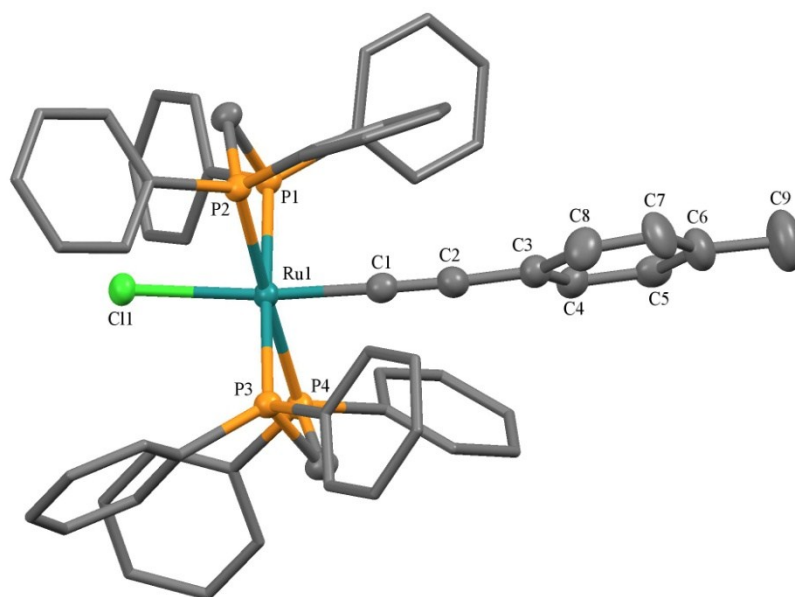

**Figure S4:** A plot of a molecule of [2e]. The solvent of crystallisation and hydrogen atoms have been removed for clarity.

**Table S4:** Crystal data and structure refinement for [2e]

|                                               |                                                                                     |
|-----------------------------------------------|-------------------------------------------------------------------------------------|
| Empirical formula                             | C <sub>59</sub> H <sub>51</sub> ClP <sub>4</sub> Ru.CH <sub>2</sub> Cl <sub>2</sub> |
| Formula weight                                | 1105.32                                                                             |
| Temperature/K                                 | 150                                                                                 |
| Crystal system                                | Triclinic                                                                           |
| Space group                                   | $P\bar{1}$                                                                          |
| $a/\text{\AA}$                                | 10.9313(5)                                                                          |
| $b/\text{\AA}$                                | 11.6259(6)                                                                          |
| $c/\text{\AA}$                                | 21.9491(10)                                                                         |
| $\alpha/^\circ$                               | 78.5220(10)                                                                         |
| $\beta/^\circ$                                | 88.2700(10)                                                                         |
| $\gamma/^\circ$                               | 75.2510(10)                                                                         |
| Volume/ $\text{\AA}^3$                        | 2643.0(2)                                                                           |
| $Z$                                           | 2                                                                                   |
| $\rho_{\text{calc}}$ mg/mm <sup>3</sup>       | 1.389                                                                               |
| $\mu/\text{mm}^{-1}$                          | 0.608                                                                               |
| Crystal size/mm <sup>3</sup>                  | 0.18 × 0.1 × 0.09                                                                   |
| 2 $\theta$ range for data collection          | 3.7 to 62°                                                                          |
| Index ranges                                  | -15 ≤ $h$ ≤ 15, -16 ≤ $k$ ≤ 16, -31 ≤ $l$ ≤ 31                                      |
| Reflections collected                         | 37618                                                                               |
| Independent reflections                       | 13993 [ $R(\text{int}) = 0.0457$ ]                                                  |
| Data/restraints/parameters                    | 13993/12/618                                                                        |
| Goodness-of-fit on $F^2$                      | 1.086                                                                               |
| Final $R$ indexes [ $I \geq 2\sigma(I)$ ]     | $R_1 = 0.0528$ , $wR_2 = 0.1413$                                                    |
| Final $R$ indexes [all data]                  | $R_1 = 0.0803$ , $wR_2 = 0.1564$                                                    |
| Largest diff. peak/hole / e $\text{\AA}^{-3}$ | 1.49/-1.11                                                                          |

## S5.5 Structure of [2f]

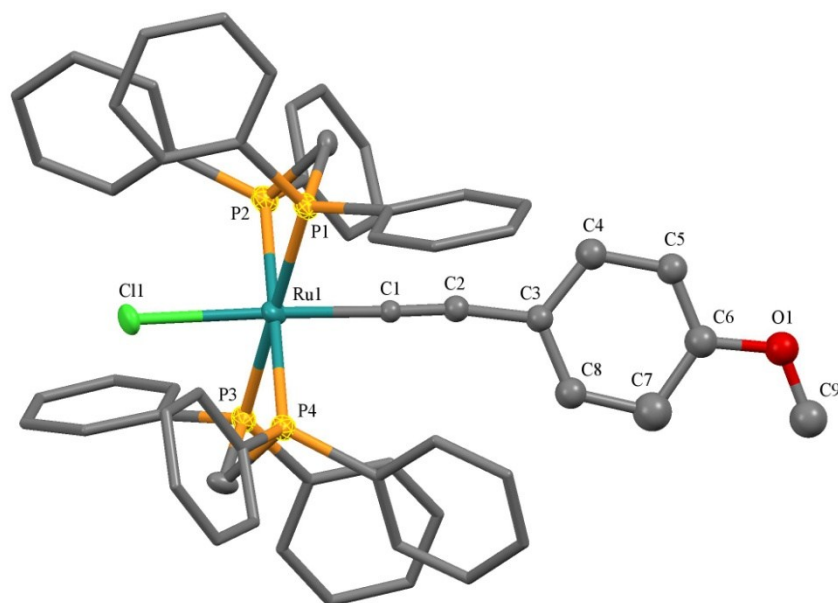

**Figure S5:** A plot of a molecule of [2f]. The solvent of crystallisation and hydrogen atoms have been removed for clarity.

**Table S5:** Crystal data and structure refinement for [2f]

|                                                              |                                                                                      |
|--------------------------------------------------------------|--------------------------------------------------------------------------------------|
| Empirical formula                                            | C <sub>59</sub> H <sub>52</sub> ClOP <sub>4</sub> Ru.CH <sub>2</sub> Cl <sub>2</sub> |
| Formula weight                                               | 1122.33                                                                              |
| Temperature/K                                                | 120                                                                                  |
| Crystal system                                               | Monoclinic                                                                           |
| Space group                                                  | <i>P</i> 2 <sub>1</sub>                                                              |
| <i>a</i> /Å                                                  | 9.5876(3)                                                                            |
| <i>b</i> /Å                                                  | 22.2227(7)                                                                           |
| <i>c</i> /Å                                                  | 12.7177(4)                                                                           |
| $\alpha$ /°                                                  | 90.00                                                                                |
| $\beta$ /°                                                   | 107.6030(10)                                                                         |
| $\gamma$ /°                                                  | 90.00                                                                                |
| Volume/Å <sup>3</sup>                                        | 2582.78(14)                                                                          |
| <i>Z</i>                                                     | 2                                                                                    |
| $\rho_{\text{calc}}$ mg/mm <sup>3</sup>                      | 1.443                                                                                |
| $\mu$ /mm <sup>-1</sup>                                      | 0.625                                                                                |
| Crystal size/mm <sup>3</sup>                                 | 0.33 × 0.18 × 0.08                                                                   |
| 2 $\theta$ range for data collection                         | 3.36 to 58°                                                                          |
| Index ranges                                                 | -12 ≤ <i>h</i> ≤ 13, -30 ≤ <i>k</i> ≤ 30, -17 ≤ <i>l</i> ≤ 17                        |
| Reflections collected                                        | 31889                                                                                |
| Independent reflections                                      | 13673 [ <i>R</i> (int) = 0.0400]                                                     |
| Data/restraints/parameters                                   | 13673/3/623                                                                          |
| Goodness-of-fit on <i>F</i> <sup>2</sup>                     | 1.171                                                                                |
| Final <i>R</i> indexes [ <i>I</i> ≥ 2 $\sigma$ ( <i>I</i> )] | <i>R</i> <sub>1</sub> = 0.0735, <i>wR</i> <sub>2</sub> = 0.1574                      |
| Final <i>R</i> indexes [all data]                            | <i>R</i> <sub>1</sub> = 0.0848, <i>wR</i> <sub>2</sub> = 0.1626                      |
| Largest diff. peak/hole / e Å <sup>-3</sup>                  | 1.82/-1.97                                                                           |



## S5.6 Structure of [3b]

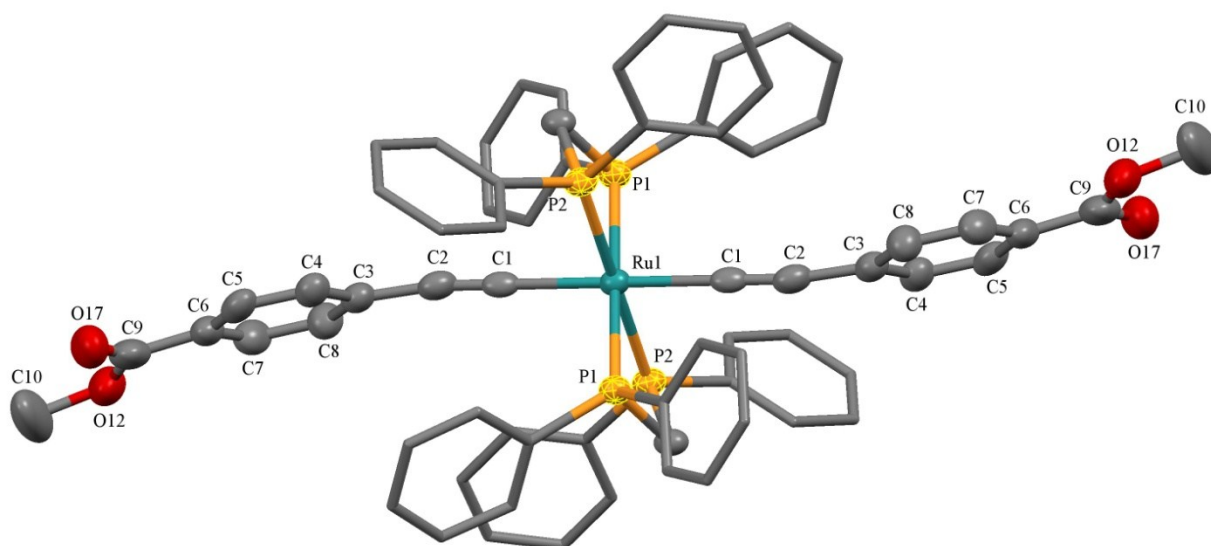

**Figure S6:** A plot of a molecule of [3b]. The solvent of crystallisation and hydrogen atoms have been removed for clarity.

**Table S6:** Crystal data and structure refinement for [3b]

|                                                              |                                                                                    |
|--------------------------------------------------------------|------------------------------------------------------------------------------------|
| Empirical formula                                            | C <sub>70</sub> H <sub>58</sub> O <sub>4</sub> P <sub>4</sub> Ru·CHCl <sub>3</sub> |
| Formula weight                                               | 1307.48                                                                            |
| Temperature/K                                                | 120                                                                                |
| Crystal system                                               | Monoclinic                                                                         |
| Space group                                                  | C2/c                                                                               |
| <i>a</i> /Å                                                  | 17.7726(15)                                                                        |
| <i>b</i> /Å                                                  | 13.9939(12)                                                                        |
| <i>c</i> /Å                                                  | 25.218(2)                                                                          |
| $\alpha$ /°                                                  | 90.00                                                                              |
| $\beta$ /°                                                   | 104.388(3)                                                                         |
| $\gamma$ /°                                                  | 90.00                                                                              |
| Volume/Å <sup>3</sup>                                        | 6075.1(9)                                                                          |
| <i>Z</i>                                                     | 4                                                                                  |
| $\rho_{\text{calc}}$ mg/mm <sup>3</sup>                      | 1.430                                                                              |
| $\mu$ /mm <sup>-1</sup>                                      | 0.546                                                                              |
| Crystal size/mm <sup>3</sup>                                 | 0.16 × 0.15 × 0.08                                                                 |
| 2 $\theta$ range for data collection                         | 3.34 to 56°                                                                        |
| Index ranges                                                 | -23 ≤ <i>h</i> ≤ 23, -18 ≤ <i>k</i> ≤ 18, -33 ≤ <i>l</i> ≤ 33                      |
| Reflections collected                                        | 34789                                                                              |
| Independent reflections                                      | 7324 [ <i>R</i> (int) = 0.2025]                                                    |
| Data/restraints/parameters                                   | 7324/10/383                                                                        |
| Goodness-of-fit on <i>F</i> <sup>2</sup>                     | 0.914                                                                              |
| Final <i>R</i> indexes [ <i>I</i> ≥ 2 $\sigma$ ( <i>I</i> )] | <i>R</i> <sub>1</sub> = 0.0680, <i>wR</i> <sub>2</sub> = 0.1614                    |
| Final <i>R</i> indexes [all data]                            | <i>R</i> <sub>1</sub> = 0.1402, <i>wR</i> <sub>2</sub> = 0.1935                    |
| Largest diff. peak/hole / e Å <sup>-3</sup>                  | 0.97/-1.04                                                                         |

### S5.7 Structure of [4e]<sup>+</sup>

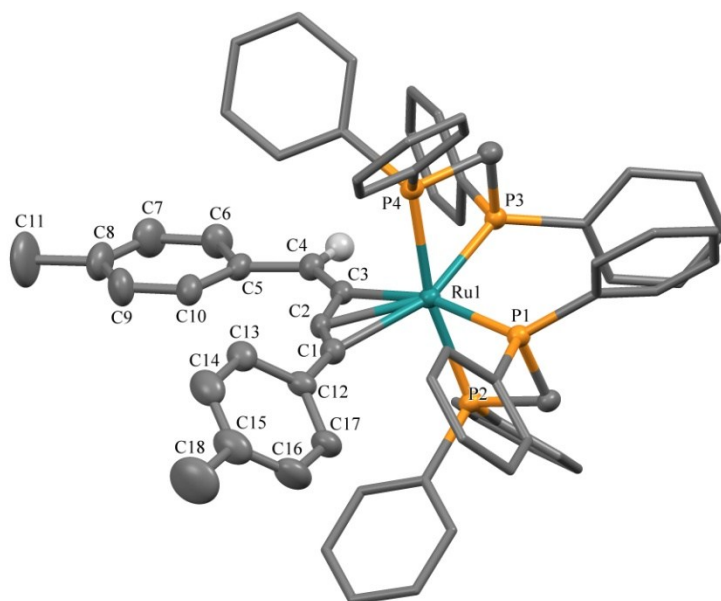

**Figure S7:** A plot of the cation [4e]<sup>+</sup>. The counter anions, solvent of crystallisation and selected hydrogen atoms have been removed for clarity.

**Table S7:** Crystal data and structure refinement for [4e]

|                                                              |                                                                                                       |
|--------------------------------------------------------------|-------------------------------------------------------------------------------------------------------|
| Empirical formula                                            | C <sub>68</sub> H <sub>59</sub> P <sub>4</sub> Ru.BF <sub>4</sub> .0.5C <sub>3</sub> H <sub>6</sub> O |
| Formula weight                                               | 1216.95                                                                                               |
| Temperature/K                                                | 120                                                                                                   |
| Crystal system                                               | Orthorhombic                                                                                          |
| Space group                                                  | <i>Pca</i> 2 <sub>1</sub>                                                                             |
| <i>a</i> /Å                                                  | 13.5079(7)                                                                                            |
| <i>b</i> /Å                                                  | 22.8614(11)                                                                                           |
| <i>c</i> /Å                                                  | 20.0977(10)                                                                                           |
| $\alpha$ /°                                                  | 90.00                                                                                                 |
| $\beta$ /°                                                   | 90.00                                                                                                 |
| $\gamma$ /°                                                  | 90.00                                                                                                 |
| Volume/Å <sup>3</sup>                                        | 6206.4(5)                                                                                             |
| <i>Z</i>                                                     | 4                                                                                                     |
| $\rho_{\text{calc}}$ mg/mm <sup>3</sup>                      | 1.302                                                                                                 |
| $\mu$ /mm <sup>-1</sup>                                      | 0.409                                                                                                 |
| Crystal size/mm <sup>3</sup>                                 | 0.28 × 0.24 × 0.04                                                                                    |
| 2 $\theta$ range for data collection                         | 3.56 to 59°                                                                                           |
| Index ranges                                                 | -18 ≤ <i>h</i> ≤ 18, -31 ≤ <i>k</i> ≤ 31, -27 ≤ <i>l</i> ≤ 27                                         |
| Reflections collected                                        | 77460                                                                                                 |
| Independent reflections                                      | 17276 [ <i>R</i> (int) = 0.0633]                                                                      |
| Data/restraints/parameters                                   | 17276/1/723                                                                                           |
| Goodness-of-fit on <i>F</i> <sup>2</sup>                     | 1.046                                                                                                 |
| Final <i>R</i> indexes [ <i>I</i> ≥ 2 $\sigma$ ( <i>I</i> )] | <i>R</i> <sub>1</sub> = 0.0443, <i>wR</i> <sub>2</sub> = 0.1098                                       |
| Final <i>R</i> indexes [all data]                            | <i>R</i> <sub>1</sub> = 0.0705, <i>wR</i> <sub>2</sub> = 0.1271                                       |
| Largest diff. peak/hole / e Å <sup>-3</sup>                  | 0.99/-0.55                                                                                            |
| Flack parameter                                              | -0.04(2)                                                                                              |

## S6. Electrochemistry

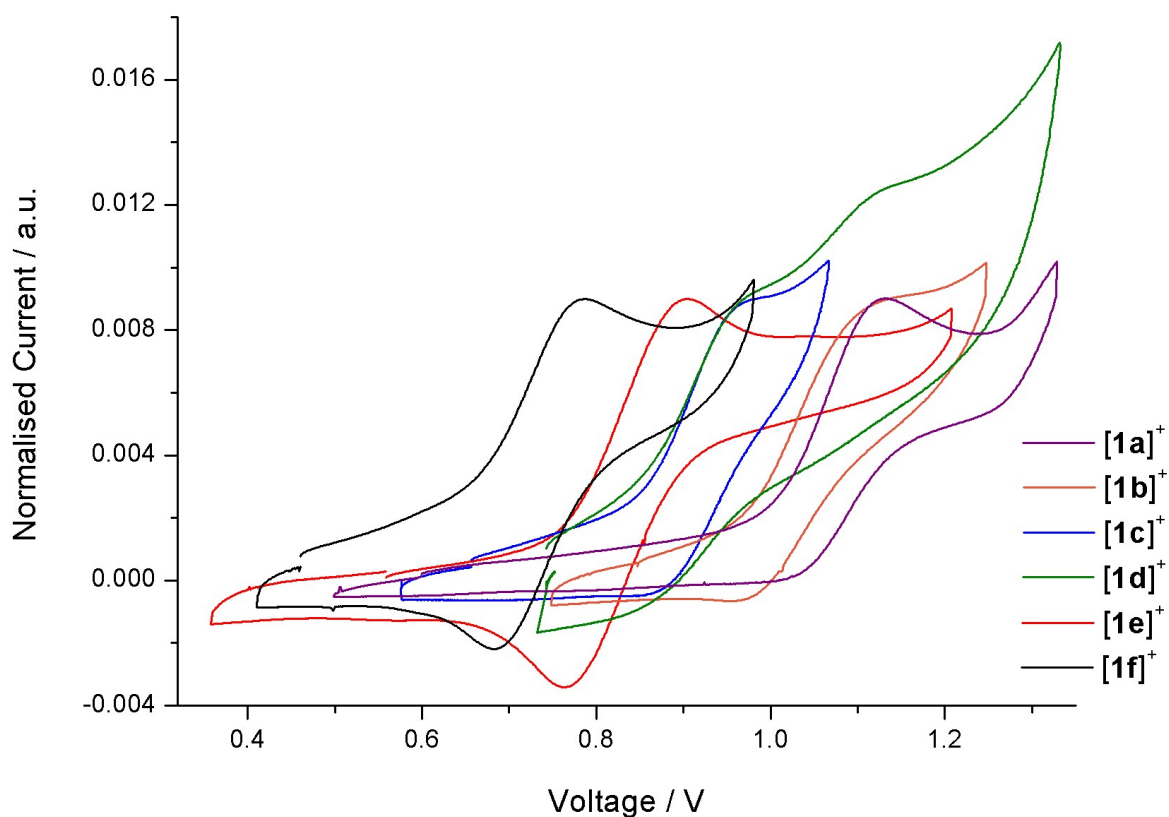

**Figure S8:** Cyclic voltammograms of *trans*-[RuCl(=C=CHC<sub>6</sub>H<sub>4</sub>-4-R)(dppm)<sub>2</sub>]<sup>+</sup>, [1]<sup>+</sup>, where R = NO<sub>2</sub>, [1a]<sup>+</sup>; COOMe, [1b]<sup>+</sup>; C≡CSiMe<sub>3</sub>, [1c]<sup>+</sup>; H, [1d]<sup>+</sup>; Me, [1e]<sup>+</sup> and OMe, [1f]<sup>+</sup>, showing the first oxidation potentials. Scans were recorded at -40 °C in CH<sub>2</sub>Cl<sub>2</sub> 0.1M [N<sup>n</sup>Bu<sub>4</sub>]PF<sub>6</sub> solutions at scan rates of 100 mVs<sup>-1</sup> and have been normalised to equal the maximum current of [1a]<sup>+</sup>.

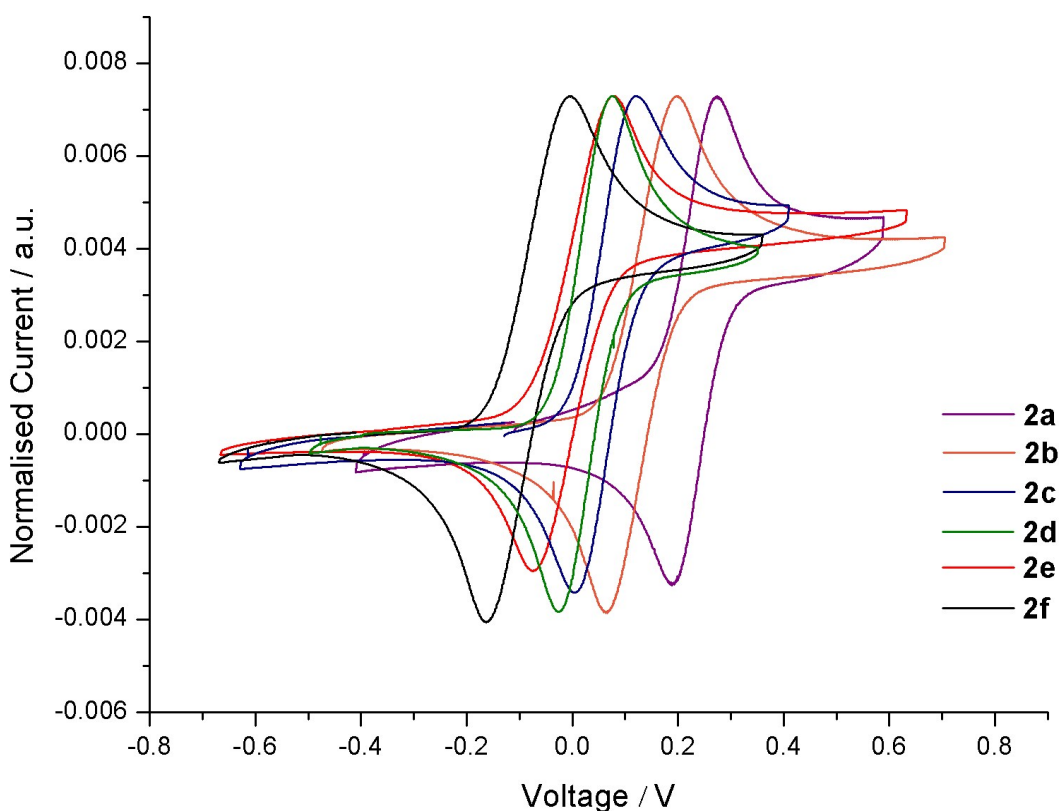

**Figure S9:** Cyclic voltammograms of *trans*-[RuCl(C≡CC<sub>6</sub>H<sub>4</sub>-4-R)(dppm)<sub>2</sub>], [**2**], where R = NO<sub>2</sub>, [**2a**]; COOMe, [**2b**]; C≡CSiMe<sub>3</sub>, [**2c**]; H, [**2d**]; Me, [**2e**] and OMe, [**2f**], showing the perturbations in first oxidation potentials, caused as a result of the varying the R group. Scans were recorded at -40 °C in CH<sub>2</sub>Cl<sub>2</sub> 0.1M [N<sup>n</sup>Bu<sub>4</sub>]PF<sub>6</sub> solutions at scan rates of 100 mVs<sup>-1</sup> and have been normalised to equal the maximum current of [**2b**].

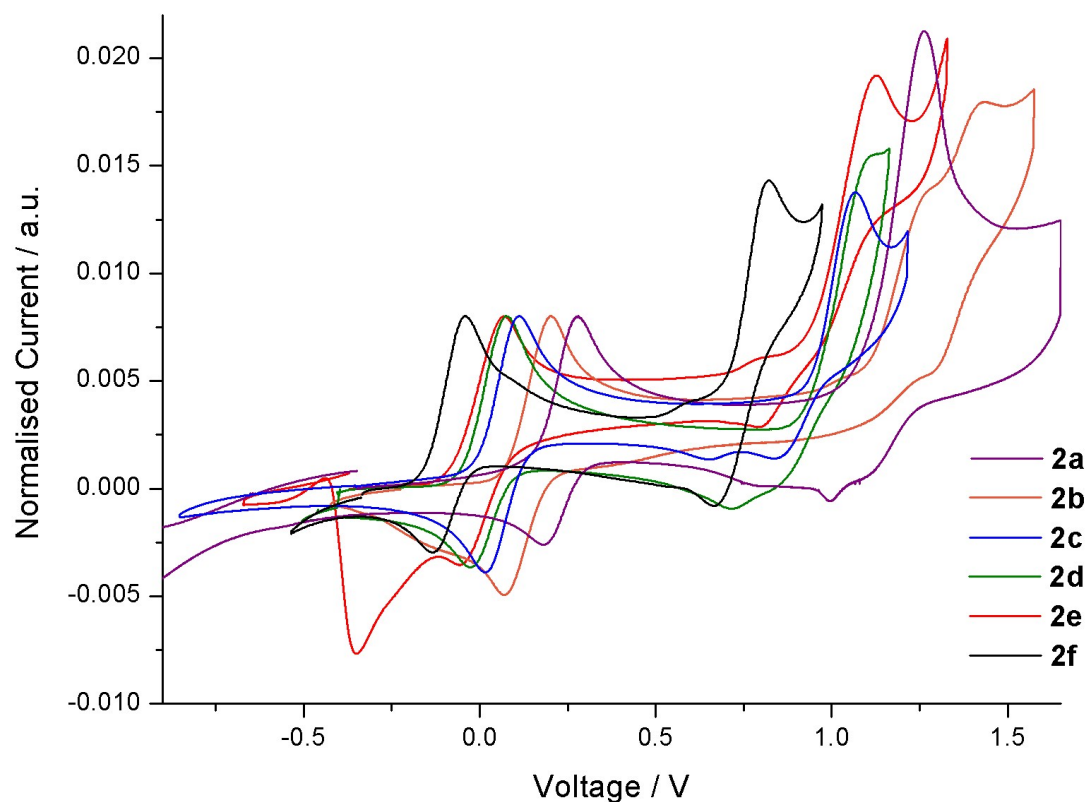

**Figure S10:** Cyclic voltammograms of *trans*-[RuCl(C≡CC<sub>6</sub>H<sub>4</sub>-4-R)(dppm)<sub>2</sub>], [**2**], where R = NO<sub>2</sub>, [**2a**]; COOMe, [**2b**]; C≡CSiMe<sub>3</sub>, [**2c**]; H, [**2d**]; Me, [**2e**] and OMe, [**2f**], showing the first and second oxidations. Scans were recorded at r.t. ([**2d**, **f**]) and -40 °C ([**2a** – **c**, **e**]) in CH<sub>2</sub>Cl<sub>2</sub> 0.1M [N<sup>n</sup>Bu<sub>4</sub>]PF<sub>6</sub> solutions at scan rates of 100 mVs<sup>-1</sup> and have been normalised to equal the maximum current of E<sub>1/2</sub>(1) of [**2a**].

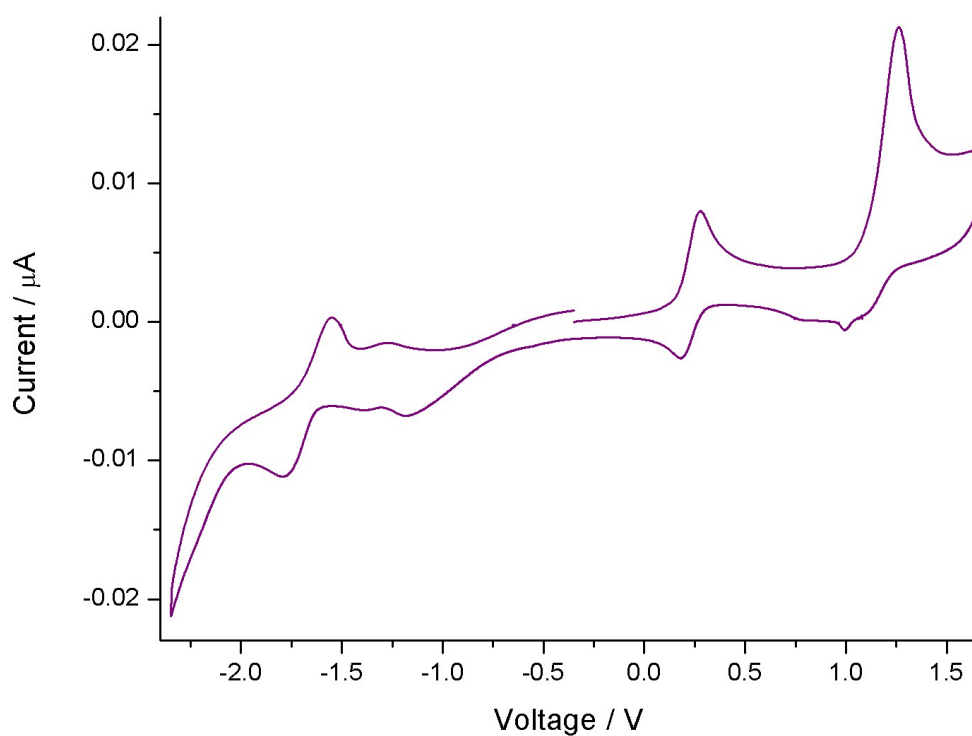

**Figure S11:** Cyclic voltammogram of *trans*-[RuCl(C≡CC<sub>6</sub>H<sub>4</sub>-4-NO<sub>2</sub>)(dppm)<sub>2</sub>], [**2a**], showing two oxidations and a reduction. The scan was recorded at -40 °C ([**2a – c, e**]) in CH<sub>2</sub>Cl<sub>2</sub> 0.1M [N<sup>n</sup>Bu<sub>4</sub>]PF<sub>6</sub> solution at scan rates of 100 mVs<sup>-1</sup>.



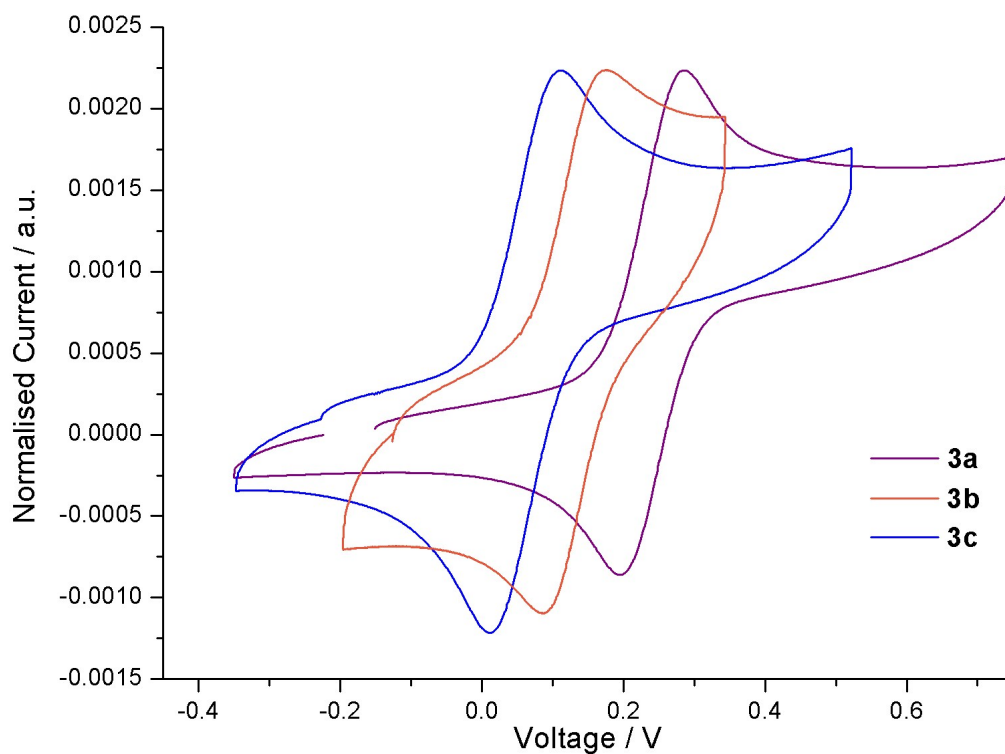

**Figure S12:** Cyclic voltammograms of *trans*-[Ru(C≡CC<sub>6</sub>H<sub>4</sub>-4-R)<sub>2</sub>(dppm)<sub>2</sub>], [**3**], where R = NO<sub>2</sub>, [**3a**]; COOMe, [**3b**] and C≡CSiMe<sub>3</sub>, [**3c**] showing the first oxidation only. Scans were recorded at -40 °C in CH<sub>2</sub>Cl<sub>2</sub> 0.1M [N<sup>n</sup>Bu<sub>4</sub>]PF<sub>6</sub> solutions at scan rates of 100 mVs<sup>-1</sup> and have been normalised to equal the maximum current of E<sub>1/2</sub>(1) of [**3a**].

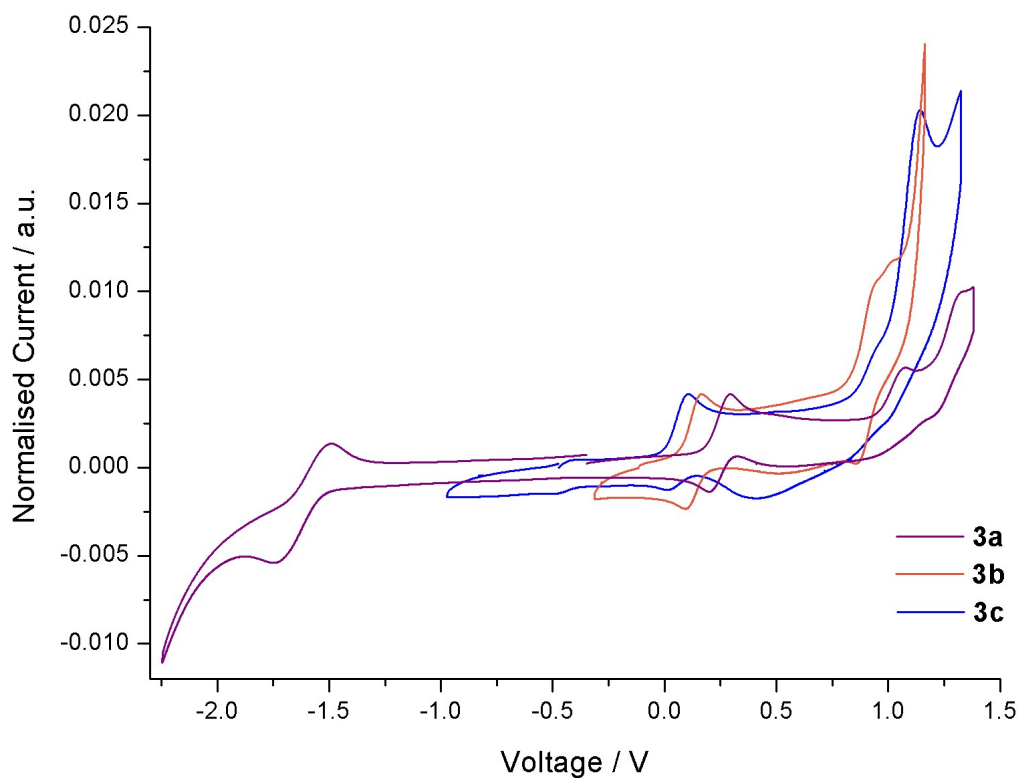

**Figure S13:** Cyclic voltammograms of *trans*-[Ru(C≡CC<sub>6</sub>H<sub>4</sub>-4-R)<sub>2</sub>(dppm)<sub>2</sub>], [**3**], where R = NO<sub>2</sub>, [**3a**]; COOMe, [**3b**] and C≡CSiMe<sub>3</sub>, [**3c**] showing two oxidations ([**3a** – **c**]) and a reduction ([**3a**]). Scans were recorded at -40 °C in CH<sub>2</sub>Cl<sub>2</sub> 0.1M [N<sup>n</sup>Bu<sub>4</sub>]PF<sub>6</sub> solutions at scan rates of 100 mVs<sup>-1</sup> and have been normalised to equal the maximum current of E<sub>1/2</sub>(1) of [**3a**].

## S7. DFT Calculations

Initial optimisations were performed at the (RI-)BP86/SV(P) level, followed by frequency calculations at the same level. Transition states were located by initially performing a constrained minimisation (by freezing internal coordinates that change most during the reaction) of a structure close to the anticipated transition state. This was followed by a frequency calculation to identify the transition vector to follow during a subsequent transition state optimisation. A final frequency calculation was then performed on the optimised transition-state structure. All minima were confirmed as such by the absence of imaginary frequencies and all transition states were identified by the presence of only one imaginary frequency. Energies, coordinates and first 50 vibrational modes are given.

Single-point calculations on the (RI-)BP86/SV(P) optimised geometries were performed using the hybrid PBE0 functional and the flexible def2-TZVPP basis set. The (RI-)PBE0/def2-TZVPP SCF energies were corrected for their zero point energies, thermal energies and entropies (obtained from the (RI-)BP86/SV(P)-level frequency calculations). In all calculations, a 28 electron quasi-relativistic ECP replaced the core electrons of Ru and Rh. No symmetry constraints were applied during optimisations. Solvent corrections were applied with the COSMO dielectric continuum model<sup>9</sup> and dispersion effects modelled with Grimme's D3 method.<sup>10, 11</sup> All calculations were performed using the TURBOMOLE V6.4 package using the resolution of identity (RI) approximation.<sup>12-20</sup>

## S7.1 Modelling Deprotonation Reactions

The differences in energy between the protonation and deprotonated complexes reported in this study was modelled by comparing the sum of the energies of the cationic vinylidene complexes (e.g.  $[D]^+$  and  $[F]^+$ ) and the bases  $(\text{MeOH})_4$ , pyridine and proton sponge (1,8-*bis*(dimethylamino)naphthalene) with the sum of the energies of the (neutral) *bis*-alkynyl complexes and the appropriate conjugate acids (Scheme 1). The data indicate that the  $\text{NO}_2$ -containing complexes are the most readily deprotonated and that in the case of both the cationic and neutral complexes the *trans*-isomers are more stable (typically by *ca.* 10  $\text{kJ mol}^{-1}$ ) than their *cis* forms.

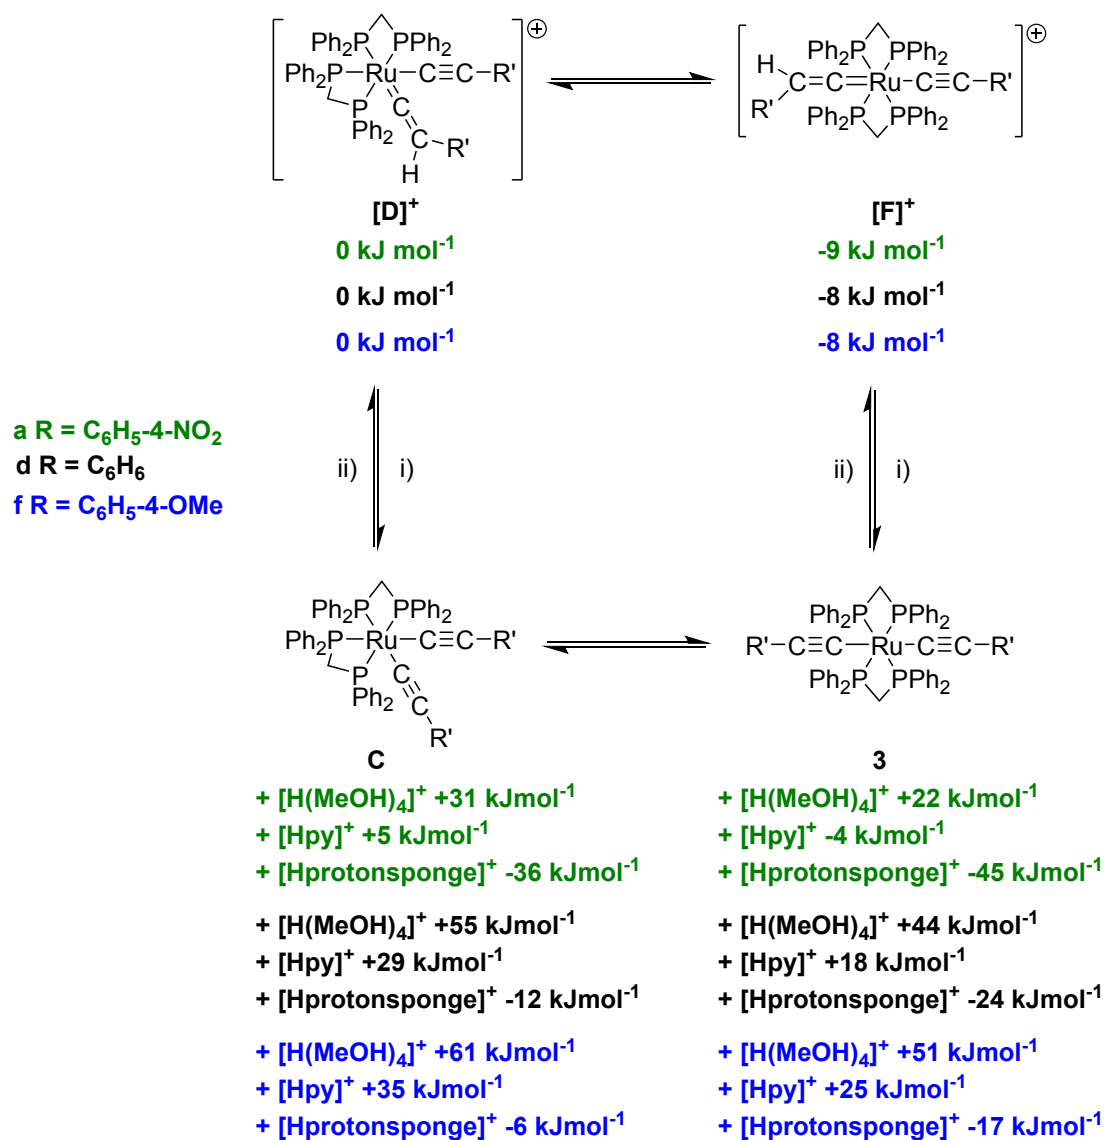

**Scheme S1:** (i) +  $(\text{MeOH})_4$ , pyridine or proton sponge; (ii) -  $(\text{MeOH})_4$ , pyridine or proton sponge.

## S7.2 Complex [Ca]

SCF Energy (au) (RI)BP86/SV(P) -4414.6823114170  
SCF Energy (au) PBE0/def2-TZVPP -4414.014671791  
SCF Energy (au) PBE0/def2-TZVPP -4414.0552660812 (CH<sub>2</sub>Cl<sub>2</sub>  
Correction)  
Zero Point Energy (au) 0.9702508  
Chemical potential (kJ mol<sup>-1</sup>) 2231.50  
Dispersion correction (au) PBE0/def2-TZVPP -0.24714811

xyz coordinates

129

|    |          |          |          |
|----|----------|----------|----------|
| Ru | 0.19241  | -0.18671 | 0.03963  |
| C  | -1.39799 | 0.03242  | -1.15567 |
| C  | -0.27124 | 1.60655  | 0.79802  |
| P  | -1.11067 | -1.35142 | 1.63466  |
| P  | 1.57971  | -0.58317 | 2.02089  |
| P  | 0.99520  | -1.93779 | -1.47589 |
| P  | 1.67471  | 0.80334  | -1.51625 |
| C  | 0.26723  | -1.64313 | 2.87484  |
| C  | 2.21764  | -0.78881 | -2.34809 |
| C  | -1.85450 | -3.01244 | 1.29402  |
| C  | -2.44690 | -3.22745 | 0.03064  |
| C  | -3.07106 | -4.45397 | -0.25595 |
| C  | -3.10010 | -5.47669 | 0.70755  |
| C  | -2.50565 | -5.27033 | 1.96512  |
| C  | -1.88921 | -4.04267 | 2.26005  |
| C  | -2.47660 | -0.51045 | 2.55959  |
| C  | -3.24566 | 0.46356  | 1.88775  |
| C  | -4.33197 | 1.07366  | 2.53989  |
| C  | -4.65004 | 0.72837  | 3.86442  |
| C  | -3.88185 | -0.23688 | 4.54004  |
| C  | -2.80278 | -0.85744 | 3.88942  |
| C  | 1.91790  | 0.75013  | 3.26812  |
| C  | 0.84152  | 1.40016  | 3.91310  |
| C  | 1.08457  | 2.42709  | 4.84015  |
| C  | 2.40074  | 2.82818  | 5.12582  |
| C  | 3.47529  | 2.19541  | 4.47879  |
| C  | 3.23739  | 1.16359  | 3.55440  |
| C  | 3.13464  | -1.58544 | 2.15121  |
| C  | 3.39417  | -2.40167 | 3.27478  |
| C  | 4.59342  | -3.12611 | 3.36678  |
| C  | 5.55453  | -3.03319 | 2.34414  |
| C  | 5.31161  | -2.21183 | 1.23112  |
| C  | 4.10611  | -1.49511 | 1.13415  |
| C  | -0.04389 | -2.58175 | -2.87343 |
| C  | -0.53863 | -1.68982 | -3.85163 |
| C  | -1.34600 | -2.16166 | -4.89978 |
| C  | -1.68150 | -3.52400 | -4.97887 |
| C  | -1.20396 | -4.41445 | -4.00277 |
| C  | -0.39124 | -3.94799 | -2.95507 |
| C  | 1.99580  | -3.44338 | -1.06192 |
| C  | 1.68715  | -4.18493 | 0.09620  |

|   |          |          |          |
|---|----------|----------|----------|
| C | 2.40306  | -5.35373 | 0.40878  |
| C | 3.44135  | -5.78889 | -0.43092 |
| C | 3.75377  | -5.05847 | -1.59155 |
| C | 3.03141  | -3.89706 | -1.90911 |
| C | 1.05558  | 1.91190  | -2.86395 |
| C | 1.68268  | 1.97247  | -4.12821 |
| C | 1.22001  | 2.86691  | -5.10729 |
| C | 0.13334  | 3.71519  | -4.82822 |
| C | -0.49114 | 3.66129  | -3.57049 |
| C | -0.03905 | 2.75954  | -2.59061 |
| C | 3.22809  | 1.66951  | -1.00158 |
| C | 3.16933  | 2.52508  | 0.12000  |
| C | 4.30902  | 3.24532  | 0.51793  |
| C | 5.51561  | 3.11059  | -0.19001 |
| C | 5.58148  | 2.25487  | -1.30392 |
| C | 4.44246  | 1.54040  | -1.71178 |
| H | 0.05028  | -1.34633 | 3.92278  |
| H | 0.58428  | -2.70727 | 2.86024  |
| H | 2.15081  | -0.80624 | -3.45650 |
| H | 3.25310  | -1.05219 | -2.04551 |
| H | -2.41663 | -2.42646 | -0.72809 |
| H | -3.53231 | -4.60918 | -1.24487 |
| H | -3.58729 | -6.43921 | 0.47924  |
| H | -2.52622 | -6.06878 | 2.72558  |
| H | -1.43963 | -3.89295 | 3.25642  |
| H | -2.98581 | 0.74376  | 0.85409  |
| H | -4.92862 | 1.83148  | 2.00621  |
| H | -5.49941 | 1.21275  | 4.37426  |
| H | -4.12665 | -0.51307 | 5.57917  |
| H | -2.22025 | -1.62277 | 4.42984  |
| H | -0.19896 | 1.11591  | 3.68961  |
| H | 0.23381  | 2.92389  | 5.33415  |
| H | 2.58782  | 3.63624  | 5.85221  |
| H | 4.51223  | 2.50051  | 4.69767  |
| H | 4.09159  | 0.67328  | 3.06139  |
| H | 2.66114  | -2.46589 | 4.09640  |
| H | 4.78229  | -3.76210 | 4.24768  |
| H | 6.49712  | -3.60037 | 2.41847  |
| H | 6.06333  | -2.12862 | 0.42926  |
| H | 3.92397  | -0.84395 | 0.26405  |
| H | -0.30502 | -0.61467 | -3.79822 |
| H | -1.72370 | -1.45269 | -5.65432 |
| H | -2.31754 | -3.89056 | -5.80147 |
| H | -1.45887 | -5.48606 | -4.05702 |
| H | -0.01935 | -4.66080 | -2.20226 |
| H | 0.86658  | -3.85270 | 0.75236  |
| H | 2.14805  | -5.92500 | 1.31630  |
| H | 4.00731  | -6.70228 | -0.18374 |
| H | 4.56183  | -5.40012 | -2.25972 |
| H | 3.27227  | -3.34869 | -2.83531 |
| H | 2.54540  | 1.32485  | -4.35933 |
| H | 1.71490  | 2.90464  | -6.09199 |
| H | -0.22698 | 4.42035  | -5.59563 |
| H | -1.34511 | 4.32156  | -3.34706 |
| H | -0.53657 | 2.70587  | -1.60872 |
| H | 2.22356  | 2.62387  | 0.68032  |

|   |          |          |          |
|---|----------|----------|----------|
| H | 4.25019  | 3.91215  | 1.39352  |
| H | 6.40935  | 3.67367  | 0.12634  |
| H | 6.52517  | 2.14605  | -1.86415 |
| H | 4.50834  | 0.88403  | -2.59619 |
| C | -2.43303 | 0.17365  | -1.84059 |
| C | -3.60148 | 0.33050  | -2.63355 |
| C | -0.55399 | 2.75360  | 1.20392  |
| C | -0.87679 | 4.05165  | 1.68294  |
| C | -5.92125 | 0.62642  | -4.22212 |
| C | -6.00041 | -0.08048 | -3.00819 |
| C | -4.85366 | -0.22424 | -2.22618 |
| C | -3.56575 | 1.04671  | -3.86954 |
| C | -4.70926 | 1.19393  | -4.65609 |
| N | -7.12669 | 0.77336  | -5.05316 |
| H | -6.96731 | -0.50586 | -2.70280 |
| H | -4.90553 | -0.77481 | -1.27366 |
| H | -2.61288 | 1.49378  | -4.19386 |
| H | -4.69140 | 1.74408  | -5.60802 |
| C | -1.50701 | 6.63233  | 2.65025  |
| C | -2.13710 | 5.50901  | 3.21633  |
| C | -1.82485 | 4.23631  | 2.73607  |
| C | -0.26427 | 5.21905  | 1.13187  |
| C | -0.57291 | 6.49423  | 1.60719  |
| N | -1.82984 | 7.97489  | 3.15878  |
| H | -2.86525 | 5.66066  | 4.02623  |
| H | -2.31889 | 3.34979  | 3.16378  |
| H | 0.46538  | 5.10043  | 0.31537  |
| H | -0.10509 | 7.39743  | 1.18947  |
| O | -2.65075 | 8.05941  | 4.08137  |
| O | -1.26039 | 8.94151  | 2.63603  |
| O | -7.02071 | 1.39832  | -6.11633 |
| O | -8.17603 | 0.26175  | -4.64201 |

\$vibrational spectrum

| #     | mode | symmetry | wave number | IR intensity | selection |
|-------|------|----------|-------------|--------------|-----------|
| rules |      |          | cm** (-1)   | km/mol       | IR        |
| RAMAN |      |          |             |              |           |
| 1     |      |          | 0.00        | 0.00000      | -         |
| 2     |      |          | 0.00        | 0.00000      | -         |
| 3     |      |          | 0.00        | 0.00000      | -         |
| 4     |      |          | 0.00        | 0.00000      | -         |
| 5     |      |          | 0.00        | 0.00000      | -         |
| 6     |      |          | 0.00        | 0.00000      | -         |
| 7     |      | a        | 10.04       | 0.42845      | YES YES   |
| 8     |      | a        | 11.43       | 0.17708      | YES YES   |
| 9     |      | a        | 13.46       | 0.23869      | YES YES   |
| 10    |      | a        | 14.43       | 0.52047      | YES YES   |
| 11    |      | a        | 16.37       | 0.03087      | YES YES   |
| 12    |      | a        | 19.80       | 0.02050      | YES YES   |
| 13    |      | a        | 22.34       | 0.02532      | YES YES   |
| 14    |      | a        | 22.97       | 0.05430      | YES YES   |
| 15    |      | a        | 25.19       | 0.00723      | YES YES   |
| 16    |      | a        | 27.24       | 0.01730      | YES YES   |
| 17    |      | a        | 29.73       | 0.07713      | YES YES   |
| 18    |      | a        | 32.50       | 0.01958      | YES YES   |

|    |   |        |         |     |     |
|----|---|--------|---------|-----|-----|
| 19 | a | 37.38  | 0.03034 | YES | YES |
| 20 | a | 39.10  | 0.07349 | YES | YES |
| 21 | a | 43.48  | 0.01417 | YES | YES |
| 22 | a | 45.09  | 0.04523 | YES | YES |
| 23 | a | 46.43  | 0.13855 | YES | YES |
| 24 | a | 47.58  | 0.00217 | YES | YES |
| 25 | a | 48.61  | 0.01779 | YES | YES |
| 26 | a | 49.36  | 0.08584 | YES | YES |
| 27 | a | 51.35  | 0.82291 | YES | YES |
| 28 | a | 51.76  | 0.02029 | YES | YES |
| 29 | a | 52.34  | 0.11620 | YES | YES |
| 30 | a | 57.68  | 0.13265 | YES | YES |
| 31 | a | 59.42  | 0.09273 | YES | YES |
| 32 | a | 60.08  | 0.54840 | YES | YES |
| 33 | a | 64.19  | 0.00797 | YES | YES |
| 34 | a | 68.50  | 0.00543 | YES | YES |
| 35 | a | 69.71  | 0.06438 | YES | YES |
| 36 | a | 72.51  | 0.00416 | YES | YES |
| 37 | a | 73.13  | 0.05297 | YES | YES |
| 38 | a | 79.41  | 0.16472 | YES | YES |
| 39 | a | 81.70  | 2.72302 | YES | YES |
| 40 | a | 83.70  | 0.39169 | YES | YES |
| 41 | a | 84.00  | 0.30339 | YES | YES |
| 42 | a | 94.68  | 0.14482 | YES | YES |
| 43 | a | 97.81  | 0.69016 | YES | YES |
| 44 | a | 105.36 | 0.27777 | YES | YES |
| 45 | a | 112.01 | 1.53000 | YES | YES |
| 46 | a | 136.69 | 0.06325 | YES | YES |
| 47 | a | 138.45 | 0.17775 | YES | YES |
| 48 | a | 159.31 | 0.01361 | YES | YES |
| 49 | a | 161.53 | 0.06187 | YES | YES |
| 50 | a | 161.95 | 0.45158 | YES | YES |



### S7.3 Complex [Da]<sup>+</sup>

SCF Energy (au) (RI)BP86/SV(P) -4415.0913828010  
SCF Energy (au) PBE0/def2-TZVPP -4414.422351381  
SCF Energy (au) PBE0/def2-TZVPP -4414.4933755759 (CH<sub>2</sub>Cl<sub>2</sub>  
Correction)  
Zero Point Energy (au) 0.9823432  
Chemical potential (kJ mol<sup>-1</sup>) 2264.27  
Dispersion correction (au) PBE0/def2-TZVPP -0.25061338

xyz coordinates

130

|    |          |          |          |
|----|----------|----------|----------|
| Ru | 0.30395  | 0.03053  | 0.29869  |
| C  | -1.23788 | 0.10689  | -1.01526 |
| C  | -0.14059 | 1.66013  | 1.02505  |
| P  | -0.97732 | -1.26031 | 1.87637  |
| P  | 1.75078  | -0.53865 | 2.21989  |
| P  | 1.19639  | -1.85414 | -1.23499 |
| P  | 1.84161  | 0.95655  | -1.30813 |
| C  | 0.48580  | -1.70781 | 2.96730  |
| C  | 2.46452  | -0.67996 | -1.97457 |
| C  | -1.76927 | -2.86683 | 1.43227  |
| C  | -2.27576 | -3.06378 | 0.13041  |
| C  | -2.92886 | -4.26702 | -0.19260 |
| C  | -3.07483 | -5.27605 | 0.77356  |
| C  | -2.56832 | -5.08344 | 2.07224  |
| C  | -1.92132 | -3.88274 | 2.40429  |
| C  | -2.24232 | -0.44276 | 2.93614  |
| C  | -3.14209 | 0.44615  | 2.30897  |
| C  | -4.18196 | 1.03426  | 3.04744  |
| C  | -4.32817 | 0.74519  | 4.41486  |
| C  | -3.43430 | -0.13870 | 5.04457  |
| C  | -2.39630 | -0.73537 | 4.30962  |
| C  | 2.01879  | 0.74560  | 3.53005  |
| C  | 0.91521  | 1.25583  | 4.25165  |
| C  | 1.10863  | 2.22303  | 5.25241  |
| C  | 2.39912  | 2.70318  | 5.53493  |
| C  | 3.49745  | 2.20851  | 4.81238  |
| C  | 3.31259  | 1.23350  | 3.81681  |
| C  | 3.36255  | -1.43183 | 2.19765  |
| C  | 3.62587  | -2.49670 | 3.08664  |
| C  | 4.89148  | -3.10535 | 3.10516  |
| C  | 5.90828  | -2.65112 | 2.24759  |
| C  | 5.65616  | -1.58476 | 1.36832  |
| C  | 4.38811  | -0.97982 | 1.33856  |
| C  | 0.24232  | -2.45966 | -2.69910 |
| C  | -0.15838 | -1.55181 | -3.70539 |
| C  | -0.87495 | -2.00722 | -4.82388 |
| C  | -1.21184 | -3.36600 | -4.94605 |
| C  | -0.82456 | -4.27095 | -3.94410 |
| C  | -0.10128 | -3.82381 | -2.82523 |
| C  | 2.13187  | -3.35922 | -0.71704 |
| C  | 1.54754  | -4.22563 | 0.23353  |

|   |          |          |          |
|---|----------|----------|----------|
| C | 2.18627  | -5.42589 | 0.58964  |
| C | 3.41868  | -5.76770 | 0.00839  |
| C | 4.00573  | -4.91065 | -0.93862 |
| C | 3.36474  | -3.71587 | -1.30532 |
| C | 1.22642  | 1.94425  | -2.73987 |
| C | 1.79512  | 1.83669  | -4.02847 |
| C | 1.35782  | 2.67628  | -5.06640 |
| C | 0.36001  | 3.63684  | -4.82448 |
| C | -0.20412 | 3.75224  | -3.54231 |
| C | 0.22151  | 2.90659  | -2.50439 |
| C | 3.35635  | 1.89439  | -0.81422 |
| C | 3.29016  | 2.79281  | 0.27167  |
| C | 4.41211  | 3.56401  | 0.62145  |
| C | 5.60877  | 3.43990  | -0.10405 |
| C | 5.68167  | 2.54554  | -1.18719 |
| C | 4.56079  | 1.77894  | -1.54540 |
| H | 0.35068  | -1.60055 | 4.06404  |
| H | 0.78649  | -2.75287 | 2.74150  |
| H | 2.56210  | -0.75821 | -3.07765 |
| H | 3.45078  | -0.89084 | -1.51004 |
| H | -2.16176 | -2.27176 | -0.62825 |
| H | -3.32377 | -4.41268 | -1.21097 |
| H | -3.58798 | -6.21738 | 0.51738  |
| H | -2.68477 | -5.87066 | 2.83502  |
| H | -1.54402 | -3.74123 | 3.43125  |
| H | -3.02998 | 0.67362  | 1.23628  |
| H | -4.87824 | 1.72789  | 2.54942  |
| H | -5.14279 | 1.21006  | 4.99371  |
| H | -3.54699 | -0.37099 | 6.11617  |
| H | -1.71425 | -1.43391 | 4.82214  |
| H | -0.10921 | 0.90568  | 4.04365  |
| H | 0.23956  | 2.60012  | 5.81581  |
| H | 2.54869  | 3.45936  | 6.32268  |
| H | 4.51443  | 2.57286  | 5.03142  |
| H | 4.18915  | 0.84319  | 3.27702  |
| H | 2.85024  | -2.85378 | 3.78343  |
| H | 5.08561  | -3.93663 | 3.80232  |
| H | 6.90199  | -3.12737 | 2.26919  |
| H | 6.45182  | -1.21667 | 0.70035  |
| H | 4.20742  | -0.13092 | 0.65862  |
| H | 0.08102  | -0.47976 | -3.62633 |
| H | -1.17583 | -1.28918 | -5.60351 |
| H | -1.77456 | -3.71961 | -5.82527 |
| H | -1.07618 | -5.34031 | -4.03502 |
| H | 0.20767  | -4.55173 | -2.05930 |
| H | 0.56905  | -3.97852 | 0.67835  |
| H | 1.71371  | -6.09883 | 1.32365  |
| H | 3.92084  | -6.70814 | 0.28807  |
| H | 4.96737  | -5.17847 | -1.40601 |
| H | 3.83042  | -3.07254 | -2.06958 |
| H | 2.59026  | 1.10248  | -4.23889 |
| H | 1.80587  | 2.58245  | -6.06906 |
| H | 0.02327  | 4.29919  | -5.63863 |
| H | -0.98586 | 4.50350  | -3.34533 |
| H | -0.23127 | 2.99843  | -1.50519 |
| H | 2.35373  | 2.89540  | 0.84186  |

|   |          |          |          |
|---|----------|----------|----------|
| H | 4.34808  | 4.26690  | 1.46778  |
| H | 6.48793  | 4.04507  | 0.17104  |
| H | 6.61596  | 2.44986  | -1.76432 |
| H | 4.63197  | 1.09558  | -2.40828 |
| C | -2.22617 | 0.19189  | -1.76488 |
| C | -3.34840 | 0.28256  | -2.64507 |
| C | -0.41933 | 2.86509  | 1.53441  |
| H | 0.30068  | 3.20669  | 2.30848  |
| C | -1.53663 | 3.76685  | 1.22866  |
| C | -5.54973 | 0.45485  | -4.38600 |
| C | -5.67234 | -0.28661 | -3.20049 |
| C | -4.57646 | -0.36928 | -2.33652 |
| C | -3.26603 | 1.03064  | -3.85438 |
| C | -4.35912 | 1.11818  | -4.72167 |
| N | -6.70874 | 0.53778  | -5.31025 |
| H | -6.62721 | -0.78440 | -2.97802 |
| H | -4.65869 | -0.94547 | -1.40158 |
| H | -2.32565 | 1.54909  | -4.09877 |
| H | -4.31403 | 1.69159  | -5.65885 |
| C | -3.64244 | 5.54874  | 0.69161  |
| C | -2.70372 | 5.87768  | 1.68100  |
| C | -1.65713 | 4.98778  | 1.94333  |
| C | -2.50453 | 3.46622  | 0.23034  |
| C | -3.55259 | 4.35144  | -0.03786 |
| N | -4.75482 | 6.48803  | 0.40758  |
| H | -2.81053 | 6.82638  | 2.22659  |
| H | -0.91426 | 5.23902  | 2.71820  |
| H | -2.42498 | 2.52749  | -0.34316 |
| H | -4.30881 | 4.13604  | -0.80654 |
| O | -5.55589 | 6.16550  | -0.47318 |
| O | -4.80280 | 7.52580  | 1.07171  |
| O | -7.73838 | -0.05513 | -4.98111 |
| O | -6.56068 | 1.19115  | -6.34557 |

\$vibrational spectrum

| #     | mode | symmetry | wave number | IR intensity | selection |
|-------|------|----------|-------------|--------------|-----------|
| rules |      |          | cm** (-1)   | km/mol       | IR        |
| RAMAN |      |          |             |              |           |
| 1     |      |          | 0.00        | 0.00000      | - -       |
| 2     |      |          | 0.00        | 0.00000      | - -       |
| 3     |      |          | 0.00        | 0.00000      | - -       |
| 4     |      |          | 0.00        | 0.00000      | - -       |
| 5     |      |          | 0.00        | 0.00000      | - -       |
| 6     |      |          | 0.00        | 0.00000      | - -       |
| 7     |      | a        | 9.99        | 0.00135      | YES YES   |
| 8     |      | a        | 12.24       | 0.24883      | YES YES   |
| 9     |      | a        | 13.48       | 0.37674      | YES YES   |
| 10    |      | a        | 14.18       | 0.32991      | YES YES   |
| 11    |      | a        | 15.28       | 0.22434      | YES YES   |
| 12    |      | a        | 18.62       | 0.17165      | YES YES   |
| 13    |      | a        | 21.73       | 0.08450      | YES YES   |
| 14    |      | a        | 27.67       | 0.06945      | YES YES   |
| 15    |      | a        | 30.92       | 0.01382      | YES YES   |
| 16    |      | a        | 33.58       | 0.06358      | YES YES   |
| 17    |      | a        | 34.16       | 0.00904      | YES YES   |

|    |   |        |         |     |     |
|----|---|--------|---------|-----|-----|
| 18 | a | 34.84  | 0.11441 | YES | YES |
| 19 | a | 36.95  | 0.06057 | YES | YES |
| 20 | a | 39.56  | 0.03326 | YES | YES |
| 21 | a | 41.14  | 0.11863 | YES | YES |
| 22 | a | 42.36  | 0.14752 | YES | YES |
| 23 | a | 43.57  | 0.17822 | YES | YES |
| 24 | a | 45.93  | 0.07770 | YES | YES |
| 25 | a | 46.33  | 0.08650 | YES | YES |
| 26 | a | 50.70  | 0.02171 | YES | YES |
| 27 | a | 51.27  | 0.07976 | YES | YES |
| 28 | a | 53.09  | 0.05899 | YES | YES |
| 29 | a | 56.03  | 0.05111 | YES | YES |
| 30 | a | 57.75  | 0.01382 | YES | YES |
| 31 | a | 61.17  | 0.26560 | YES | YES |
| 32 | a | 63.01  | 0.08898 | YES | YES |
| 33 | a | 63.12  | 0.03156 | YES | YES |
| 34 | a | 63.50  | 0.11697 | YES | YES |
| 35 | a | 67.90  | 0.09807 | YES | YES |
| 36 | a | 70.54  | 0.25852 | YES | YES |
| 37 | a | 72.95  | 0.12209 | YES | YES |
| 38 | a | 78.89  | 0.96687 | YES | YES |
| 39 | a | 80.78  | 0.55347 | YES | YES |
| 40 | a | 82.52  | 0.73700 | YES | YES |
| 41 | a | 89.48  | 0.05010 | YES | YES |
| 42 | a | 96.03  | 0.13928 | YES | YES |
| 43 | a | 97.73  | 0.92025 | YES | YES |
| 44 | a | 105.51 | 1.20953 | YES | YES |
| 45 | a | 113.09 | 1.45449 | YES | YES |
| 46 | a | 138.06 | 0.25197 | YES | YES |
| 47 | a | 139.13 | 0.13672 | YES | YES |
| 48 | a | 152.89 | 0.17519 | YES | YES |
| 49 | a | 155.34 | 0.30586 | YES | YES |
| 50 | a | 160.21 | 0.49621 | YES | YES |

## S7.4 Complex [Fa]<sup>+</sup>

SCF Energy (au) (RI)BP86/SV(P) -4415.0965565700  
SCF Energy (au) PBE0/def2-TZVPP -4414.429150638  
SCF Energy (au) PBE0/def2-TZVPP -4414.4971860093 (CH<sub>2</sub>Cl<sub>2</sub>  
Correction)  
Zero Point Energy (au) 0.9826514  
Chemical potential (kJ mol<sup>-1</sup>) 2267.18  
Dispersion correction (au) PBE0/def2-TZVPP -0.25143364

xyz coordinates

130

|    |          |          |          |
|----|----------|----------|----------|
| C  | 0.35866  | -1.86408 | 0.26310  |
| C  | -1.66027 | -0.19065 | -2.77317 |
| C  | 1.03148  | 0.74472  | -3.66484 |
| C  | 0.62222  | -2.05572 | -3.09839 |
| C  | 1.61826  | 0.28141  | 2.60644  |
| C  | -0.94481 | 1.74857  | 3.11844  |
| C  | -0.93321 | -1.10418 | 3.33873  |
| C  | 3.59358  | -0.72166 | 0.62072  |
| P  | -2.22157 | -0.23044 | -0.97870 |
| C  | -0.06013 | 1.96564  | -0.63113 |
| P  | 2.20186  | 0.46293  | 0.82514  |
| P  | 0.18387  | -0.37705 | -2.47680 |
| P  | -0.22981 | 0.25855  | 2.30220  |
| Ru | -0.00063 | 0.14605  | -0.11783 |
| C  | 0.64503  | -3.05857 | 0.47173  |
| C  | -3.11748 | -1.82542 | -0.76601 |
| C  | -3.57484 | 1.02090  | -0.82073 |
| C  | 3.02413  | 2.11378  | 0.76568  |
| H  | -1.84804 | 0.82134  | -3.19148 |
| H  | -2.11745 | -0.94989 | -3.44244 |
| H  | 1.96592  | 1.09209  | 3.28025  |
| H  | 1.96276  | -0.69077 | 3.01542  |
| C  | -2.06405 | -3.16452 | 4.91179  |
| C  | -0.77081 | -3.30887 | 4.38145  |
| C  | -0.20914 | -2.29013 | 3.59384  |
| C  | -2.23570 | -0.96731 | 3.87293  |
| C  | -2.79550 | -1.99299 | 4.65200  |
| H  | -2.49991 | -3.96387 | 5.53306  |
| H  | -0.18809 | -4.22305 | 4.57875  |
| H  | 0.79687  | -2.43880 | 3.17413  |
| H  | -2.81767 | -0.04880 | 3.69751  |
| H  | -3.80806 | -1.86689 | 5.06877  |
| C  | -2.24374 | 3.86175  | 4.46543  |
| C  | -1.06173 | 3.31063  | 4.99226  |
| C  | -0.42074 | 2.25051  | 4.33096  |
| C  | -2.12700 | 2.31069  | 2.58996  |
| C  | -2.77860 | 3.35646  | 3.26866  |
| H  | -2.75019 | 4.68643  | 4.99286  |
| H  | -0.64042 | 3.70083  | 5.93301  |
| H  | 0.48335  | 1.80813  | 4.78093  |
| H  | -2.54659 | 1.92618  | 1.64535  |

|   |          |          |          |
|---|----------|----------|----------|
| H | -3.70640 | 3.78081  | 2.85228  |
| C | 5.77720  | -2.47330 | 0.28736  |
| C | 4.75879  | -2.42537 | -0.67940 |
| C | 3.66578  | -1.55702 | -0.51209 |
| C | 4.62158  | -0.77147 | 1.59085  |
| C | 5.70566  | -1.64809 | 1.42497  |
| H | 6.63089  | -3.15837 | 0.15708  |
| H | 4.80460  | -3.07736 | -1.56645 |
| H | 2.85474  | -1.54962 | -1.25667 |
| H | 4.58712  | -0.11629 | 2.47782  |
| H | 6.50231  | -1.68251 | 2.18595  |
| C | 4.22957  | 4.66544  | 0.61909  |
| C | 4.84603  | 3.55872  | 0.01206  |
| C | 4.24908  | 2.28791  | 0.08319  |
| C | 2.40197  | 3.23514  | 1.35967  |
| C | 3.00675  | 4.50022  | 1.29290  |
| H | 4.70315  | 5.65940  | 0.56937  |
| H | 5.80858  | 3.67897  | -0.51169 |
| H | 4.75506  | 1.42520  | -0.37931 |
| H | 1.43553  | 3.13273  | 1.88096  |
| H | 2.51447  | 5.36386  | 1.76827  |
| C | 1.28717  | -4.62618 | -4.05758 |
| C | 0.12262  | -4.43668 | -3.29336 |
| C | -0.20698 | -3.16199 | -2.80656 |
| C | 1.79335  | -2.25085 | -3.86467 |
| C | 2.12219  | -3.53234 | -4.33886 |
| H | 1.54207  | -5.62904 | -4.43697 |
| H | -0.53673 | -5.29059 | -3.06955 |
| H | -1.11574 | -3.03784 | -2.19681 |
| H | 2.44737  | -1.39967 | -4.11201 |
| H | 3.03248  | -3.67062 | -4.94489 |
| C | 2.40352  | 2.38371  | -5.50627 |
| C | 1.19083  | 1.77324  | -5.87387 |
| C | 0.50884  | 0.95236  | -4.96109 |
| C | 2.24800  | 1.36097  | -3.30118 |
| C | 2.93260  | 2.17449  | -4.22123 |
| H | 2.93810  | 3.02484  | -6.22596 |
| H | 0.77406  | 1.93264  | -6.88167 |
| H | -0.43110 | 0.46594  | -5.27103 |
| H | 2.66020  | 1.21594  | -2.28864 |
| H | 3.88151  | 2.65164  | -3.92748 |
| C | -4.60031 | -4.19380 | -0.38326 |
| C | -3.67668 | -3.77582 | 0.58897  |
| C | -2.93025 | -2.59819 | 0.39875  |
| C | -4.05755 | -2.24455 | -1.73713 |
| C | -4.78888 | -3.42721 | -1.54837 |
| H | -5.18056 | -5.11906 | -0.23350 |
| H | -3.52919 | -4.36888 | 1.50582  |
| H | -2.19382 | -2.28721 | 1.15464  |
| H | -4.23710 | -1.64087 | -2.64276 |
| H | -5.51703 | -3.74747 | -2.31131 |
| C | -5.61663 | 2.94991  | -0.49751 |
| C | -4.46857 | 3.25552  | -1.24950 |
| C | -3.44955 | 2.30177  | -1.40563 |
| C | -4.72821 | 0.72275  | -0.05894 |
| C | -5.74060 | 1.68446  | 0.10062  |

|   |          |          |          |
|---|----------|----------|----------|
| H | -6.41656 | 3.69906  | -0.38032 |
| H | -4.36107 | 4.24602  | -1.72006 |
| H | -2.54943 | 2.57222  | -1.98027 |
| H | -4.84739 | -0.26958 | 0.40410  |
| H | -6.63861 | 1.43507  | 0.68927  |
| C | 0.96087  | -4.42673 | 0.72539  |
| C | 1.58027  | -7.12207 | 1.24047  |
| C | 2.55263  | -6.13867 | 1.48183  |
| C | 2.24215  | -4.79998 | 1.22510  |
| C | 0.00184  | -5.45471 | 0.49404  |
| C | 0.30645  | -6.79483 | 0.74900  |
| N | 1.90683  | -8.54416 | 1.51195  |
| H | 3.53661  | -6.44407 | 1.86600  |
| H | 2.99667  | -4.01770 | 1.40101  |
| H | -0.99417 | -5.17901 | 0.11408  |
| H | -0.42174 | -7.60071 | 0.57725  |
| C | 0.12811  | 3.15664  | -1.21720 |
| C | -0.36262 | 4.50654  | -0.92757 |
| H | 0.80807  | 3.08240  | -2.09496 |
| C | -1.25989 | 7.13029  | -0.44734 |
| C | -1.55491 | 6.11951  | 0.48263  |
| C | -1.10690 | 4.81904  | 0.24039  |
| C | -0.07619 | 5.55630  | -1.84204 |
| C | -0.52078 | 6.86174  | -1.60989 |
| N | -1.73592 | 8.51001  | -0.19099 |
| H | -2.12879 | 6.37621  | 1.38463  |
| H | -1.32326 | 4.02684  | 0.97234  |
| H | 0.50645  | 5.33684  | -2.75190 |
| H | -0.30709 | 7.68204  | -2.31028 |
| O | 1.02837  | -9.37969 | 1.28561  |
| O | 3.03420  | -8.79325 | 1.94528  |
| O | -2.38784 | 8.70151  | 0.83949  |
| O | -1.45003 | 9.37267  | -1.02445 |

\$vibrational spectrum

| #     | mode | symmetry | wave number | IR intensity | selection |
|-------|------|----------|-------------|--------------|-----------|
| rules |      |          | cm**(-1)    | km/mol       | IR        |
| RAMAN |      |          |             |              |           |
| 1     |      |          | 0.00        | 0.00000      | -         |
| 2     |      |          | 0.00        | 0.00000      | -         |
| 3     |      |          | 0.00        | 0.00000      | -         |
| 4     |      |          | 0.00        | 0.00000      | -         |
| 5     |      |          | 0.00        | 0.00000      | -         |
| 6     |      |          | 0.00        | 0.00000      | -         |
| 7     |      | a        | 10.07       | 1.25799      | YES YES   |
| 8     |      | a        | 11.08       | 1.01111      | YES YES   |
| 9     |      | a        | 13.12       | 0.60105      | YES YES   |
| 10    |      | a        | 16.88       | 0.05467      | YES YES   |
| 11    |      | a        | 17.08       | 0.13715      | YES YES   |
| 12    |      | a        | 21.84       | 0.01633      | YES YES   |
| 13    |      | a        | 23.87       | 0.16237      | YES YES   |
| 14    |      | a        | 26.11       | 0.01403      | YES YES   |
| 15    |      | a        | 26.92       | 0.03881      | YES YES   |
| 16    |      | a        | 30.21       | 0.03654      | YES YES   |
| 17    |      | a        | 32.32       | 0.37058      | YES YES   |

|    |   |        |         |     |     |
|----|---|--------|---------|-----|-----|
| 18 | a | 33.90  | 0.02360 | YES | YES |
| 19 | a | 36.38  | 0.19615 | YES | YES |
| 20 | a | 39.09  | 0.02565 | YES | YES |
| 21 | a | 41.79  | 0.24397 | YES | YES |
| 22 | a | 44.65  | 0.00717 | YES | YES |
| 23 | a | 46.12  | 0.13299 | YES | YES |
| 24 | a | 47.64  | 0.03392 | YES | YES |
| 25 | a | 50.71  | 0.01981 | YES | YES |
| 26 | a | 51.87  | 0.03382 | YES | YES |
| 27 | a | 53.33  | 0.02482 | YES | YES |
| 28 | a | 56.54  | 0.08476 | YES | YES |
| 29 | a | 57.16  | 0.22462 | YES | YES |
| 30 | a | 59.15  | 0.38226 | YES | YES |
| 31 | a | 61.18  | 0.27714 | YES | YES |
| 32 | a | 63.77  | 0.11814 | YES | YES |
| 33 | a | 64.66  | 0.01654 | YES | YES |
| 34 | a | 65.83  | 0.05464 | YES | YES |
| 35 | a | 68.06  | 0.10114 | YES | YES |
| 36 | a | 71.16  | 0.30568 | YES | YES |
| 37 | a | 76.17  | 0.09982 | YES | YES |
| 38 | a | 77.67  | 0.25172 | YES | YES |
| 39 | a | 80.58  | 0.14780 | YES | YES |
| 40 | a | 84.67  | 0.09820 | YES | YES |
| 41 | a | 88.09  | 0.06611 | YES | YES |
| 42 | a | 96.08  | 4.16955 | YES | YES |
| 43 | a | 99.87  | 1.26133 | YES | YES |
| 44 | a | 104.41 | 0.10112 | YES | YES |
| 45 | a | 122.78 | 2.17684 | YES | YES |
| 46 | a | 142.60 | 0.30901 | YES | YES |
| 47 | a | 147.66 | 0.04182 | YES | YES |
| 48 | a | 149.50 | 0.55996 | YES | YES |
| 49 | a | 156.99 | 0.67706 | YES | YES |
| 50 | a | 161.08 | 1.07876 | YES | YES |



## S7.5 Complex [3a]

SCF Energy (au) (RI)BP86/SV(P) -4414.6858956400  
SCF Energy (au) PBE0/def2-TZVPP -4414.020956248  
SCF Energy (au) PBE0/def2-TZVPP -4414.0578065813 (CH<sub>2</sub>Cl<sub>2</sub>  
Correction)  
Zero Point Energy (au) 0.9704468  
Chemical potential (kJ mol<sup>-1</sup>) 2227.92  
Dispersion correction (au) PBE0/def2-TZVPP -0.24667993

xyz coordinates

129

|    |          |          |          |
|----|----------|----------|----------|
| C  | 0.17892  | -2.01128 | 0.56127  |
| C  | -1.55003 | 0.13533  | -2.78245 |
| C  | 1.35654  | 0.72349  | -3.41109 |
| C  | 0.39921  | -1.97941 | -3.30323 |
| C  | 1.49079  | -0.07309 | 2.64601  |
| C  | -0.69560 | 1.88167  | 3.08124  |
| C  | -1.31268 | -0.88561 | 3.35307  |
| C  | 3.56834  | -0.79540 | 0.61667  |
| P  | -2.20745 | -0.30937 | -1.07445 |
| C  | -0.14828 | 1.89744  | -0.57635 |
| P  | 2.08994  | 0.28241  | 0.89927  |
| P  | 0.23013  | -0.35506 | -2.41872 |
| P  | -0.32341 | 0.25245  | 2.28183  |
| Ru | -0.04955 | -0.07194 | -0.06359 |
| C  | 0.37104  | -3.14315 | 1.06416  |
| C  | -3.03040 | -1.95042 | -1.30164 |
| C  | -3.66538 | 0.79524  | -0.74857 |
| C  | 2.84785  | 1.96564  | 0.93386  |
| H  | -1.60231 | 1.24001  | -2.87354 |
| H  | -2.02583 | -0.34759 | -3.66216 |
| H  | 1.96699  | 0.46659  | 3.49148  |
| H  | 1.61711  | -1.16872 | 2.77899  |
| C  | -2.95550 | -2.50893 | 4.98020  |
| C  | -1.57060 | -2.45268 | 5.20895  |
| C  | -0.75162 | -1.64499 | 4.39987  |
| C  | -2.70509 | -0.94889 | 3.12608  |
| C  | -3.52088 | -1.75455 | 3.93624  |
| H  | -3.59607 | -3.14231 | 5.61591  |
| H  | -1.11834 | -3.04487 | 6.02153  |
| H  | 0.33289  | -1.61848 | 4.59312  |
| H  | -3.15834 | -0.36004 | 2.31022  |
| H  | -4.60689 | -1.79351 | 3.74997  |
| C  | -1.35506 | 4.32717  | 4.32481  |
| C  | -0.63763 | 3.34730  | 5.03612  |
| C  | -0.31381 | 2.12867  | 4.42001  |
| C  | -1.41974 | 2.86346  | 2.37633  |
| C  | -1.74805 | 4.08129  | 2.99951  |
| H  | -1.61019 | 5.28426  | 4.80949  |
| H  | -0.33470 | 3.53066  | 6.08054  |
| H  | 0.22715  | 1.35946  | 4.99762  |
| H  | -1.71111 | 2.67813  | 1.33124  |

|   |          |          |          |
|---|----------|----------|----------|
| H | -2.31072 | 4.84433  | 2.43750  |
| C | 5.81292  | -2.44492 | 0.16581  |
| C | 4.61037  | -2.68854 | -0.51903 |
| C | 3.48909  | -1.87056 | -0.29193 |
| C | 4.78226  | -0.54991 | 1.29690  |
| C | 5.89617  | -1.37572 | 1.07600  |
| H | 6.69068  | -3.08840 | -0.01144 |
| H | 4.54068  | -3.52276 | -1.23675 |
| H | 2.53747  | -2.07141 | -0.80868 |
| H | 4.86374  | 0.29882  | 1.99641  |
| H | 6.83851  | -1.17795 | 1.61340  |
| C | 4.08684  | 4.50582  | 0.83767  |
| C | 4.02504  | 3.70518  | -0.31743 |
| C | 3.40639  | 2.44746  | -0.27234 |
| C | 2.89425  | 2.78210  | 2.08223  |
| C | 3.51361  | 4.04493  | 2.03337  |
| H | 4.57302  | 5.49467  | 0.80086  |
| H | 4.45474  | 4.06608  | -1.26600 |
| H | 3.35371  | 1.83620  | -1.18859 |
| H | 2.44045  | 2.45194  | 3.02915  |
| H | 3.54429  | 4.66972  | 2.94133  |
| C | 0.53612  | -4.45044 | -4.66475 |
| C | 0.36434  | -4.42076 | -3.27160 |
| C | 0.29475  | -3.19152 | -2.59064 |
| C | 0.57143  | -2.01479 | -4.70741 |
| C | 0.63777  | -3.24401 | -5.38173 |
| H | 0.59215  | -5.41506 | -5.19636 |
| H | 0.28247  | -5.36073 | -2.70153 |
| H | 0.15937  | -3.16919 | -1.49684 |
| H | 0.65996  | -1.07676 | -5.28000 |
| H | 0.77281  | -3.25922 | -6.47619 |
| C | 3.21514  | 2.32449  | -4.82111 |
| C | 1.86757  | 2.71072  | -4.73916 |
| C | 0.94350  | 1.91669  | -4.03684 |
| C | 2.71647  | 0.34336  | -3.49492 |
| C | 3.63781  | 1.13723  | -4.19607 |
| H | 3.93749  | 2.94843  | -5.37292 |
| H | 1.52692  | 3.64192  | -5.22058 |
| H | -0.10608 | 2.24217  | -3.98226 |
| H | 3.06180  | -0.58630 | -3.01218 |
| H | 4.69321  | 0.82354  | -4.25528 |
| C | -4.34881 | -4.43267 | -1.57269 |
| C | -3.55695 | -4.17482 | -0.44202 |
| C | -2.89780 | -2.93950 | -0.30513 |
| C | -3.83806 | -2.21240 | -2.43199 |
| C | -4.48906 | -3.44821 | -2.56814 |
| H | -4.85897 | -5.40423 | -1.68177 |
| H | -3.43899 | -4.94328 | 0.33949  |
| H | -2.25416 | -2.74800 | 0.56782  |
| H | -3.97331 | -1.44505 | -3.21247 |
| H | -5.11171 | -3.64333 | -3.45706 |
| C | -5.85681 | 2.48804  | -0.15268 |
| C | -4.67317 | 3.02384  | -0.68912 |
| C | -3.58206 | 2.18777  | -0.97806 |
| C | -4.85819 | 0.26500  | -0.20504 |
| C | -5.94317 | 1.10761  | 0.09248  |

|   |          |          |          |
|---|----------|----------|----------|
| H | -6.71146 | 3.14663  | 0.07418  |
| H | -4.59148 | 4.10614  | -0.88315 |
| H | -2.64845 | 2.62718  | -1.36342 |
| H | -4.94941 | -0.81760 | -0.02278 |
| H | -6.86700 | 0.67584  | 0.51225  |
| C | 0.55131  | -4.44607 | 1.60262  |
| C | 0.89690  | -7.04544 | 2.66184  |
| C | 1.87489  | -6.51383 | 1.80128  |
| C | 1.70193  | -5.23053 | 1.28111  |
| C | -0.41491 | -5.02103 | 2.48586  |
| C | -0.24758 | -6.30419 | 3.00857  |
| N | 1.07525  | -8.39886 | 3.21122  |
| H | 2.75726  | -7.12354 | 1.55878  |
| H | 2.46459  | -4.80185 | 0.61248  |
| H | -1.30187 | -4.42830 | 2.75889  |
| H | -0.98627 | -6.75441 | 3.68733  |
| C | -0.15582 | 3.10522  | -0.91015 |
| C | -0.16479 | 4.49091  | -1.21217 |
| C | -0.19220 | 7.26379  | -1.78690 |
| C | 0.52660  | 6.79236  | -0.67156 |
| C | 0.53912  | 5.42658  | -0.39013 |
| C | -0.88247 | 5.01239  | -2.33469 |
| C | -0.89874 | 6.37794  | -2.62113 |
| N | -0.20531 | 8.70209  | -2.08560 |
| H | 1.06595  | 7.51668  | -0.04420 |
| H | 1.10112  | 5.04651  | 0.47646  |
| H | -1.43632 | 4.31610  | -2.98513 |
| H | -1.44941 | 6.78433  | -3.48182 |
| O | 0.19697  | -8.83363 | 3.96743  |
| O | 2.09274  | -9.02339 | 2.88498  |
| O | 0.42721  | 9.45362  | -1.33134 |
| O | -0.84799 | 9.08038  | -3.07464 |

\$vibrational spectrum

| #     | mode | symmetry | wave number | IR intensity | selection |
|-------|------|----------|-------------|--------------|-----------|
| rules |      |          | cm** (-1)   | km/mol       | IR        |
| RAMAN |      |          |             |              |           |
| 1     |      |          | 0.00        | 0.00000      | - -       |
| 2     |      |          | 0.00        | 0.00000      | - -       |
| 3     |      |          | 0.00        | 0.00000      | - -       |
| 4     |      |          | 0.00        | 0.00000      | - -       |
| 5     |      |          | 0.00        | 0.00000      | - -       |
| 6     |      |          | 0.00        | 0.00000      | - -       |
| 7     |      | a        | 7.97        | 0.93724      | YES YES   |
| 8     |      | a        | 9.61        | 0.90920      | YES YES   |
| 9     |      | a        | 12.50       | 0.74822      | YES YES   |
| 10    |      | a        | 14.03       | 0.45632      | YES YES   |
| 11    |      | a        | 15.03       | 0.26518      | YES YES   |
| 12    |      | a        | 16.93       | 0.11791      | YES YES   |
| 13    |      | a        | 18.54       | 0.11897      | YES YES   |
| 14    |      | a        | 23.76       | 0.00600      | YES YES   |
| 15    |      | a        | 24.97       | 0.09444      | YES YES   |
| 16    |      | a        | 25.70       | 0.04708      | YES YES   |
| 17    |      | a        | 29.46       | 0.04086      | YES YES   |
| 18    |      | a        | 30.64       | 0.11069      | YES YES   |

|    |   |        |         |     |     |
|----|---|--------|---------|-----|-----|
| 19 | a | 32.36  | 0.11539 | YES | YES |
| 20 | a | 34.07  | 0.04354 | YES | YES |
| 21 | a | 36.77  | 0.06864 | YES | YES |
| 22 | a | 37.23  | 0.13466 | YES | YES |
| 23 | a | 39.31  | 0.05882 | YES | YES |
| 24 | a | 43.72  | 0.00857 | YES | YES |
| 25 | a | 45.28  | 0.13094 | YES | YES |
| 26 | a | 47.45  | 0.11721 | YES | YES |
| 27 | a | 49.22  | 0.17009 | YES | YES |
| 28 | a | 50.32  | 0.06909 | YES | YES |
| 29 | a | 53.27  | 0.12928 | YES | YES |
| 30 | a | 55.40  | 0.14373 | YES | YES |
| 31 | a | 57.96  | 0.48882 | YES | YES |
| 32 | a | 59.25  | 0.14563 | YES | YES |
| 33 | a | 63.88  | 0.02511 | YES | YES |
| 34 | a | 68.20  | 0.23011 | YES | YES |
| 35 | a | 71.87  | 0.12358 | YES | YES |
| 36 | a | 73.10  | 0.03531 | YES | YES |
| 37 | a | 74.53  | 0.28821 | YES | YES |
| 38 | a | 76.00  | 0.02188 | YES | YES |
| 39 | a | 80.88  | 0.48807 | YES | YES |
| 40 | a | 86.95  | 0.16394 | YES | YES |
| 41 | a | 88.60  | 0.12583 | YES | YES |
| 42 | a | 96.27  | 0.79911 | YES | YES |
| 43 | a | 100.22 | 2.02203 | YES | YES |
| 44 | a | 106.67 | 0.30281 | YES | YES |
| 45 | a | 124.95 | 1.68536 | YES | YES |
| 46 | a | 125.93 | 0.02343 | YES | YES |
| 47 | a | 146.39 | 0.27583 | YES | YES |
| 48 | a | 149.01 | 0.00738 | YES | YES |
| 49 | a | 158.95 | 0.47087 | YES | YES |
| 50 | a | 163.13 | 0.62718 | YES | YES |

## S7.6 Complex [4a]<sup>+</sup>

SCF Energy (au) (RI)BP86/SV(P) -4415.1264505100  
SCF Energy (au) PBE0/def2-TZVPP -4414.460118520  
SCF Energy (au) PBE0/def2-TZVPP -4414.5281117027 (CH<sub>2</sub>Cl<sub>2</sub>  
Correction)  
Zero Point Energy (au) 0.9847536  
Chemical potential (kJ mol<sup>-1</sup>) 2280.76  
Dispersion correction (au) PBE0/def2-TZVPP -0.25513376

xyz coordinates

130

|   |          |          |         |
|---|----------|----------|---------|
| C | 1.71823  | -1.97370 | 2.69977 |
| C | 2.10892  | -2.07960 | 4.05573 |
| H | 2.20761  | -1.17702 | 4.68255 |
| C | 2.39329  | -3.33393 | 4.61626 |
| H | 2.69532  | -3.40401 | 5.67413 |
| C | 2.30619  | -4.49611 | 3.82684 |
| H | 2.53553  | -5.48032 | 4.26692 |
| C | 1.93533  | -4.39627 | 2.47687 |
| H | 1.87201  | -5.30162 | 1.85165 |
| C | 1.64064  | -3.14112 | 1.91317 |
| H | 1.34971  | -3.07283 | 0.85516 |
| C | 3.05171  | 0.46709  | 2.26154 |
| C | 4.10506  | 0.08284  | 1.39927 |
| H | 3.90726  | -0.60263 | 0.55798 |
| C | 5.40751  | 0.56190  | 1.61308 |
| H | 6.22190  | 0.24653  | 0.94041 |
| C | 5.67383  | 1.43267  | 2.68536 |
| H | 6.69702  | 1.80561  | 2.85469 |
| C | 4.63301  | 1.81703  | 3.54691 |
| H | 4.83801  | 2.48958  | 4.39596 |
| C | 3.32752  | 1.33494  | 3.34021 |
| H | 2.53041  | 1.63321  | 4.04094 |
| C | -2.41124 | 1.80757  | 2.49713 |
| C | -3.42874 | 2.21431  | 1.60677 |
| H | -3.54378 | 1.71478  | 0.63107 |
| C | -4.32282 | 3.23839  | 1.96565 |
| H | -5.12099 | 3.53529  | 1.26566 |
| C | -4.20240 | 3.87451  | 3.21218 |
| H | -4.90392 | 4.67615  | 3.49542 |
| C | -3.18795 | 3.47865  | 4.10132 |
| H | -3.09011 | 3.96989  | 5.08314 |
| C | -2.30191 | 2.44694  | 3.75106 |
| H | -1.52980 | 2.13759  | 4.47385 |
| C | -2.32902 | -0.99952 | 2.87474 |
| C | -1.71549 | -1.99911 | 3.66220 |
| H | -0.62542 | -2.01327 | 3.81219 |
| C | -2.48764 | -3.01163 | 4.25798 |
| H | -1.99017 | -3.77869 | 4.87335 |
| C | -3.87962 | -3.04563 | 4.07325 |
| H | -4.48358 | -3.83731 | 4.54568 |
| C | -4.49745 | -2.05755 | 3.28693 |

|   |          |          |          |
|---|----------|----------|----------|
| H | -5.59016 | -2.06866 | 3.14193  |
| C | -3.73074 | -1.04139 | 2.69336  |
| H | -4.24053 | -0.26637 | 2.09967  |
| C | 0.18750  | 0.52064  | 3.14662  |
| H | 0.12422  | 0.11709  | 4.17972  |
| H | 0.42509  | 1.60632  | 3.18905  |
| C | -1.08268 | 0.46250  | -3.43327 |
| C | -0.04054 | 1.16365  | -4.07974 |
| H | 0.51511  | 1.95787  | -3.55518 |
| C | 0.30500  | 0.85316  | -5.40510 |
| H | 1.11242  | 1.41470  | -5.90238 |
| C | -0.37143 | -0.16887 | -6.09290 |
| H | -0.09794 | -0.41006 | -7.13295 |
| C | -1.39773 | -0.88138 | -5.44999 |
| H | -1.93451 | -1.68265 | -5.98361 |
| C | -1.75386 | -0.56971 | -4.12739 |
| H | -2.57178 | -1.12631 | -3.64207 |
| C | -3.35062 | 0.56805  | -1.67232 |
| C | -3.91734 | -0.54709 | -1.02119 |
| H | -3.26915 | -1.25600 | -0.48156 |
| C | -5.30749 | -0.75861 | -1.06364 |
| H | -5.74080 | -1.63932 | -0.56251 |
| C | -6.13818 | 0.14746  | -1.74343 |
| H | -7.22751 | -0.01792 | -1.77431 |
| C | -5.57803 | 1.26383  | -2.39246 |
| H | -6.22658 | 1.97258  | -2.93297 |
| C | -4.18988 | 1.47067  | -2.36610 |
| H | -3.76051 | 2.33526  | -2.90017 |
| C | 1.69248  | 3.18587  | -1.14418 |
| C | 2.99644  | 2.83933  | -0.72944 |
| H | 3.14400  | 2.06652  | 0.04187  |
| C | 4.11710  | 3.47357  | -1.29305 |
| H | 5.12726  | 3.19639  | -0.95007 |
| C | 3.95050  | 4.45199  | -2.28740 |
| H | 4.82891  | 4.94702  | -2.73245 |
| C | 2.65566  | 4.80281  | -2.70640 |
| H | 2.51368  | 5.57610  | -3.47896 |
| C | 1.53301  | 4.18209  | -2.13276 |
| H | 0.53054  | 4.50558  | -2.45604 |
| C | 0.06002  | 3.78248  | 1.04851  |
| C | 1.08621  | 3.90566  | 2.01353  |
| H | 1.94426  | 3.21302  | 2.00540  |
| C | 1.05180  | 4.93464  | 2.96809  |
| H | 1.86669  | 5.02151  | 3.70548  |
| C | -0.00588 | 5.86041  | 2.97068  |
| H | -0.03003 | 6.67352  | 3.71428  |
| C | -1.02435 | 5.75030  | 2.01076  |
| H | -1.85291 | 6.47674  | 1.99611  |
| C | -0.99358 | 4.71933  | 1.05536  |
| H | -1.80342 | 4.66938  | 0.31189  |
| C | -1.23058 | 2.63582  | -1.39322 |
| H | -2.09763 | 3.03153  | -0.82461 |
| H | -1.09142 | 3.25550  | -2.30330 |
| C | -0.40011 | -2.11421 | -0.63932 |
| C | 0.63087  | -1.58425 | -1.21487 |
| C | 1.46305  | -0.51885 | -1.41093 |

|    |          |          |          |
|----|----------|----------|----------|
| C  | 2.55891  | -0.19116 | -2.14844 |
| H  | 2.94209  | 0.83936  | -2.07028 |
| C  | 3.30296  | -1.06159 | -3.06232 |
| C  | 3.00087  | -2.43564 | -3.26069 |
| H  | 2.16679  | -2.89515 | -2.70658 |
| C  | 3.74793  | -3.21912 | -4.14271 |
| H  | 3.52824  | -4.28404 | -4.30567 |
| C  | 4.81476  | -2.62986 | -4.84247 |
| N  | 5.60942  | -3.46071 | -5.78263 |
| C  | 5.14832  | -1.27788 | -4.67441 |
| H  | 5.99163  | -0.85899 | -5.24208 |
| C  | 4.39320  | -0.50534 | -3.78640 |
| H  | 4.64381  | 0.55915  | -3.64500 |
| C  | -1.21135 | -3.30378 | -0.63900 |
| C  | -1.09584 | -4.22197 | -1.72709 |
| H  | -0.39774 | -3.99546 | -2.54837 |
| C  | -1.86255 | -5.38741 | -1.76848 |
| H  | -1.78668 | -6.10307 | -2.59998 |
| C  | -2.75842 | -5.64934 | -0.71758 |
| C  | -2.89688 | -4.77247 | 0.36772  |
| H  | -3.60495 | -5.02126 | 1.17063  |
| C  | -2.12757 | -3.60446 | 0.40312  |
| H  | -2.21908 | -2.91600 | 1.25399  |
| P  | 1.39196  | -0.29690 | 1.96863  |
| P  | -1.33926 | 0.35691  | 2.06961  |
| P  | 0.24203  | 2.45275  | -0.24351 |
| P  | -1.52239 | 0.80938  | -1.67595 |
| Ru | -0.02983 | 0.09764  | 0.03875  |
| O  | 6.53905  | -2.90986 | -6.37585 |
| O  | 5.28331  | -4.64342 | -5.90495 |
| N  | -3.58140 | -6.88509 | -0.75866 |
| O  | -3.42641 | -7.63412 | -1.72491 |
| O  | -4.36284 | -7.07394 | 0.17651  |

\$vibrational spectrum

| #     | mode | symmetry | wave number | IR intensity | selection |
|-------|------|----------|-------------|--------------|-----------|
| rules |      |          | cm** (-1)   | km/mol       | IR        |
| RAMAN |      |          |             |              |           |
| 1     |      |          | 0.00        | 0.00000      | -         |
| 2     |      |          | 0.00        | 0.00000      | -         |
| 3     |      |          | 0.00        | 0.00000      | -         |
| 4     |      |          | 0.00        | 0.00000      | -         |
| 5     |      |          | 0.00        | 0.00000      | -         |
| 6     |      |          | 0.00        | 0.00000      | -         |
| 7     |      | a        | 11.24       | 0.04966      | YES YES   |
| 8     |      | a        | 14.23       | 0.58100      | YES YES   |
| 9     |      | a        | 16.84       | 0.51049      | YES YES   |
| 10    |      | a        | 20.04       | 0.16311      | YES YES   |
| 11    |      | a        | 22.48       | 0.19931      | YES YES   |
| 12    |      | a        | 24.09       | 0.10877      | YES YES   |
| 13    |      | a        | 27.25       | 0.00640      | YES YES   |
| 14    |      | a        | 30.53       | 0.06394      | YES YES   |
| 15    |      | a        | 30.96       | 0.11481      | YES YES   |
| 16    |      | a        | 35.88       | 0.00857      | YES YES   |
| 17    |      | a        | 38.25       | 0.02175      | YES YES   |

|    |   |        |         |     |     |
|----|---|--------|---------|-----|-----|
| 18 | a | 39.41  | 0.13811 | YES | YES |
| 19 | a | 41.11  | 0.07873 | YES | YES |
| 20 | a | 43.20  | 0.18312 | YES | YES |
| 21 | a | 43.57  | 0.13303 | YES | YES |
| 22 | a | 45.62  | 0.05928 | YES | YES |
| 23 | a | 47.98  | 0.11543 | YES | YES |
| 24 | a | 49.64  | 0.05758 | YES | YES |
| 25 | a | 50.42  | 0.05554 | YES | YES |
| 26 | a | 51.36  | 0.01825 | YES | YES |
| 27 | a | 53.13  | 0.07725 | YES | YES |
| 28 | a | 57.30  | 0.05413 | YES | YES |
| 29 | a | 59.58  | 0.03909 | YES | YES |
| 30 | a | 60.19  | 0.27577 | YES | YES |
| 31 | a | 62.85  | 0.04280 | YES | YES |
| 32 | a | 64.26  | 0.30615 | YES | YES |
| 33 | a | 67.70  | 0.37652 | YES | YES |
| 34 | a | 68.35  | 0.02852 | YES | YES |
| 35 | a | 74.76  | 0.17936 | YES | YES |
| 36 | a | 75.82  | 0.13189 | YES | YES |
| 37 | a | 79.66  | 0.21202 | YES | YES |
| 38 | a | 81.70  | 0.41244 | YES | YES |
| 39 | a | 85.20  | 0.30745 | YES | YES |
| 40 | a | 90.55  | 0.08056 | YES | YES |
| 41 | a | 95.64  | 0.46826 | YES | YES |
| 42 | a | 100.64 | 0.44060 | YES | YES |
| 43 | a | 106.19 | 0.48920 | YES | YES |
| 44 | a | 110.39 | 0.21825 | YES | YES |
| 45 | a | 132.02 | 1.21286 | YES | YES |
| 46 | a | 141.59 | 0.89693 | YES | YES |
| 47 | a | 149.76 | 0.48134 | YES | YES |
| 48 | a | 159.62 | 0.38742 | YES | YES |
| 49 | a | 162.68 | 0.05242 | YES | YES |
| 50 | a | 164.90 | 0.77574 | YES | YES |



## S7.7 Complex [4'a]<sup>+</sup>

## S7.8 Complex TS<sub>[D<sub>a</sub>]<sup>+</sup>-[4'a]</sub>

SCF Energy (au) (RI)BP86/SV(P) -4415.0822987510  
SCF Energy (au) PBE0/def2-TZVPP -4414.415216112  
SCF Energy (au) PBE0/def2-TZVPP -4414.4830294445 (CH<sub>2</sub>Cl<sub>2</sub>  
Correction)  
Zero Point Energy (au) 0.9817220  
Chemical potential (kJ mol<sup>-1</sup>) 2264.65  
Dispersion correction (au) PBE0/def2-TZVPP -0.25228148

xyz coordinates

130

|    |          |          |          |
|----|----------|----------|----------|
| C  | -1.32138 | 0.33367  | -0.78259 |
| C  | -0.42178 | 1.56762  | 0.67832  |
| Ru | 0.37552  | -0.08339 | 0.27804  |
| P  | -0.85173 | -1.42555 | 1.85305  |
| P  | 1.83745  | -0.64259 | 2.14511  |
| P  | 1.37738  | -1.89991 | -1.15572 |
| P  | 1.92939  | 0.88700  | -1.25722 |
| C  | 0.67100  | -1.95868 | 2.81018  |
| C  | 2.72439  | -0.73003 | -1.76256 |
| C  | -1.72869 | -2.96722 | 1.34850  |
| C  | -2.21523 | -3.09052 | 0.03033  |
| C  | -2.91202 | -4.24963 | -0.35557 |
| C  | -3.12100 | -5.28811 | 0.56698  |
| C  | -2.63829 | -5.16728 | 1.88366  |
| C  | -1.94918 | -4.00953 | 2.27746  |
| C  | -2.02688 | -0.65672 | 3.04815  |
| C  | -3.01140 | 0.21270  | 2.52597  |
| C  | -3.97908 | 0.77458  | 3.37524  |
| C  | -3.97120 | 0.47919  | 4.74949  |
| C  | -2.99153 | -0.38120 | 5.27458  |
| C  | -2.02274 | -0.94854 | 4.42972  |
| C  | 1.98004  | 0.59315  | 3.52654  |
| C  | 0.84143  | 1.34094  | 3.90192  |
| C  | 0.90591  | 2.24865  | 4.97159  |
| C  | 2.11283  | 2.43800  | 5.66766  |
| C  | 3.25061  | 1.70485  | 5.29443  |
| C  | 3.18742  | 0.78301  | 4.23427  |
| C  | 3.51855  | -1.40736 | 2.12237  |
| C  | 3.80343  | -2.60460 | 2.81323  |
| C  | 5.11125  | -3.11858 | 2.83356  |
| C  | 6.14903  | -2.44197 | 2.17081  |
| C  | 5.87528  | -1.24509 | 1.48605  |
| C  | 4.56834  | -0.72994 | 1.45986  |
| C  | 0.57330  | -2.53194 | -2.70408 |
| C  | -0.52055 | -1.83620 | -3.26307 |
| C  | -1.10994 | -2.28505 | -4.45801 |
| C  | -0.61824 | -3.43151 | -5.10391 |
| C  | 0.46931  | -4.12993 | -4.55078 |
| C  | 1.06283  | -3.68722 | -3.35740 |
| C  | 2.24480  | -3.41533 | -0.54617 |
| C  | 1.46069  | -4.40900 | 0.08609  |

|   |          |          |          |
|---|----------|----------|----------|
| C | 2.04632  | -5.61144 | 0.51487  |
| C | 3.42001  | -5.83813 | 0.31804  |
| C | 4.20390  | -4.85733 | -0.31169 |
| C | 3.62161  | -3.65223 | -0.74265 |
| C | 1.34275  | 1.72096  | -2.79351 |
| C | 1.23372  | 1.06405  | -4.03733 |
| C | 0.77654  | 1.76325  | -5.16888 |
| C | 0.41811  | 3.11769  | -5.06864 |
| C | 0.51704  | 3.77610  | -3.82884 |
| C | 0.97632  | 3.08423  | -2.69750 |
| C | 3.28374  | 2.00889  | -0.70331 |
| C | 3.18228  | 2.68454  | 0.53066  |
| C | 4.20504  | 3.55813  | 0.94256  |
| C | 5.33458  | 3.75260  | 0.13062  |
| C | 5.44032  | 3.08022  | -1.10169 |
| C | 4.41661  | 2.21787  | -1.52365 |
| H | 0.59997  | -2.02044 | 3.91638  |
| H | 0.98321  | -2.94636 | 2.40507  |
| H | 3.02675  | -0.84314 | -2.82503 |
| H | 3.62101  | -0.85467 | -1.11771 |
| H | -2.05062 | -2.27543 | -0.69236 |
| H | -3.29087 | -4.33906 | -1.38647 |
| H | -3.66629 | -6.19630 | 0.26226  |
| H | -2.80658 | -5.97779 | 2.61162  |
| H | -1.59017 | -3.92078 | 3.31677  |
| H | -3.01680 | 0.45136  | 1.44989  |
| H | -4.74238 | 1.45153  | 2.95842  |
| H | -4.73096 | 0.92116  | 5.41459  |
| H | -2.97979 | -0.61627 | 6.35139  |
| H | -1.26609 | -1.62061 | 4.86586  |
| H | -0.11104 | 1.20718  | 3.36531  |
| H | 0.00431  | 2.81253  | 5.26170  |
| H | 2.16470  | 3.15596  | 6.50232  |
| H | 4.20109  | 1.84296  | 5.83537  |
| H | 4.08833  | 0.21063  | 3.96680  |
| H | 3.01075  | -3.14608 | 3.35310  |
| H | 5.31923  | -4.05317 | 3.37937  |
| H | 7.17506  | -2.84407 | 2.19438  |
| H | 6.68558  | -0.70097 | 0.97383  |
| H | 4.37380  | 0.22537  | 0.94494  |
| H | -0.91610 | -0.94144 | -2.75820 |
| H | -1.96587 | -1.73409 | -4.88076 |
| H | -1.08553 | -3.78541 | -6.03749 |
| H | 0.85895  | -5.03297 | -5.04863 |
| H | 1.90738  | -4.25347 | -2.93436 |
| H | 0.37674  | -4.25635 | 0.22141  |
| H | 1.42042  | -6.38011 | 0.99700  |
| H | 3.87814  | -6.78450 | 0.64888  |
| H | 5.27935  | -5.03084 | -0.47875 |
| H | 4.25681  | -2.90670 | -1.24633 |
| H | 1.50191  | 0.00203  | -4.14375 |
| H | 0.70833  | 1.24173  | -6.13715 |
| H | 0.06767  | 3.66502  | -5.95888 |
| H | 0.24078  | 4.83902  | -3.74206 |
| H | 1.06096  | 3.61559  | -1.73551 |
| H | 2.29921  | 2.52554  | 1.17019  |

|   |          |         |          |
|---|----------|---------|----------|
| H | 4.11611  | 4.08746 | 1.90494  |
| H | 6.13660  | 4.43577 | 0.45484  |
| H | 6.32273  | 3.23696 | -1.74351 |
| H | 4.49855  | 1.71406 | -2.50165 |
| C | -2.40746 | 0.56432 | -1.35464 |
| C | -3.61693 | 0.78004 | -2.07776 |
| C | -0.90878 | 2.76547 | 1.02233  |
| H | -0.43456 | 3.07779 | 1.98093  |
| C | -1.90995 | 3.70376 | 0.49732  |
| C | -5.99195 | 1.19624 | -3.51841 |
| C | -6.06607 | 0.68125 | -2.21482 |
| C | -4.88246 | 0.47245 | -1.50099 |
| C | -3.58346 | 1.30316 | -3.40357 |
| C | -4.76440 | 1.50918 | -4.12302 |
| N | -7.24938 | 1.41505 | -4.28184 |
| H | -7.05229 | 0.45341 | -1.78552 |
| H | -4.92316 | 0.06334 | -0.47962 |
| H | -2.61074 | 1.54611 | -3.85972 |
| H | -4.76079 | 1.91213 | -5.14595 |
| C | -3.85055 | 5.53276 | -0.38870 |
| C | -3.49495 | 5.52026 | 0.96840  |
| C | -2.52320 | 4.61271 | 1.40118  |
| C | -2.27667 | 3.76276 | -0.87135 |
| C | -3.24504 | 4.66975 | -1.31470 |
| N | -4.88669 | 6.48702 | -0.85781 |
| H | -3.98750 | 6.21977 | 1.65900  |
| H | -2.23890 | 4.59295 | 2.46619  |
| H | -1.78120 | 3.09767 | -1.59292 |
| H | -3.54241 | 4.72800 | -2.37134 |
| O | -8.30798 | 1.14305 | -3.71329 |
| O | -7.14248 | 1.84997 | -5.42979 |
| O | -5.15739 | 6.48060 | -2.06075 |
| O | -5.40626 | 7.21800 | -0.01200 |

\$vibrational spectrum

| #     | mode | symmetry | wave number | IR intensity | selection |     |
|-------|------|----------|-------------|--------------|-----------|-----|
| rules |      |          | cm**(-1)    | km/mol       | IR        |     |
| RAMAN |      |          |             |              |           |     |
| 1     |      | a        | -167.54     | 0.00000      | YES       | YES |
| 2     |      |          | 0.00        | 0.00000      | -         | -   |
| 3     |      |          | 0.00        | 0.00000      | -         | -   |
| 4     |      |          | 0.00        | 0.00000      | -         | -   |
| 5     |      |          | 0.00        | 0.00000      | -         | -   |
| 6     |      |          | 0.00        | 0.00000      | -         | -   |
| 7     |      |          | 0.00        | 0.00000      | -         | -   |
| 8     |      | a        | 7.31        | 0.06810      | YES       | YES |
| 9     |      | a        | 9.07        | 0.20773      | YES       | YES |
| 10    |      | a        | 12.50       | 0.34022      | YES       | YES |
| 11    |      | a        | 14.27       | 0.34359      | YES       | YES |
| 12    |      | a        | 16.94       | 0.09446      | YES       | YES |
| 13    |      | a        | 21.26       | 0.22390      | YES       | YES |
| 14    |      | a        | 24.68       | 0.06506      | YES       | YES |
| 15    |      | a        | 25.91       | 0.09234      | YES       | YES |
| 16    |      | a        | 27.33       | 0.05194      | YES       | YES |
| 17    |      | a        | 31.58       | 0.11584      | YES       | YES |

|    |   |        |         |     |     |
|----|---|--------|---------|-----|-----|
| 18 | a | 33.18  | 0.02877 | YES | YES |
| 19 | a | 34.30  | 0.08693 | YES | YES |
| 20 | a | 37.91  | 0.15189 | YES | YES |
| 21 | a | 40.41  | 0.09302 | YES | YES |
| 22 | a | 41.55  | 0.10566 | YES | YES |
| 23 | a | 42.42  | 0.17594 | YES | YES |
| 24 | a | 43.97  | 0.00965 | YES | YES |
| 25 | a | 46.18  | 0.04070 | YES | YES |
| 26 | a | 48.25  | 0.17003 | YES | YES |
| 27 | a | 51.81  | 0.02402 | YES | YES |
| 28 | a | 52.32  | 0.27070 | YES | YES |
| 29 | a | 54.99  | 0.26180 | YES | YES |
| 30 | a | 58.66  | 0.45749 | YES | YES |
| 31 | a | 60.92  | 0.10825 | YES | YES |
| 32 | a | 62.00  | 0.03849 | YES | YES |
| 33 | a | 62.98  | 0.03195 | YES | YES |
| 34 | a | 65.15  | 0.18977 | YES | YES |
| 35 | a | 66.52  | 0.59513 | YES | YES |
| 36 | a | 70.12  | 0.11553 | YES | YES |
| 37 | a | 73.77  | 0.05614 | YES | YES |
| 38 | a | 78.99  | 0.39562 | YES | YES |
| 39 | a | 81.24  | 0.17375 | YES | YES |
| 40 | a | 87.35  | 4.27660 | YES | YES |
| 41 | a | 95.38  | 3.34393 | YES | YES |
| 42 | a | 98.01  | 3.11575 | YES | YES |
| 43 | a | 98.94  | 0.77228 | YES | YES |
| 44 | a | 103.81 | 2.09470 | YES | YES |
| 45 | a | 111.20 | 4.30521 | YES | YES |
| 46 | a | 114.17 | 4.29656 | YES | YES |
| 47 | a | 134.90 | 0.90579 | YES | YES |
| 48 | a | 141.67 | 1.78940 | YES | YES |
| 49 | a | 151.27 | 1.45347 | YES | YES |
| 50 | a | 158.36 | 1.31688 | YES | YES |

## S7.9 Complex [Cd]

SCF Energy (au) (RI)BP86/SV(P) -4005.8897602980  
SCF Energy (au) PBE0/def2-TZVPP -4005.234579914  
SCF Energy (au) PBE0/def2-TZVPP -4005.2659683361 (CH<sub>2</sub>Cl<sub>2</sub>  
Correction)  
Zero Point Energy (au) 0.9650456  
Chemical potential (kJ mol<sup>-1</sup>) 2240.46  
Dispersion correction (au) PBE0/def2-TZVPP -0.24089199

xyz coordinates

125

|    |          |          |          |
|----|----------|----------|----------|
| Ru | 0.04707  | -0.04531 | 0.00888  |
| C  | -1.55517 | 0.18093  | -1.18761 |
| C  | -0.42487 | 1.75912  | 0.76419  |
| P  | -1.26110 | -1.20076 | 1.59560  |
| P  | 1.42347  | -0.43221 | 1.98640  |
| P  | 0.83978  | -1.78455 | -1.50880 |
| P  | 1.51823  | 0.95214  | -1.54144 |
| C  | 0.10423  | -1.47713 | 2.85385  |
| C  | 2.04922  | -0.63121 | -2.39854 |
| C  | -1.99667 | -2.86658 | 1.25527  |
| C  | -2.58540 | -3.07936 | -0.01038 |
| C  | -3.19980 | -4.30904 | -0.30414 |
| C  | -3.22278 | -5.33726 | 0.65389  |
| C  | -2.63222 | -5.13293 | 1.91359  |
| C  | -2.02563 | -3.90192 | 2.21576  |
| C  | -2.64216 | -0.36568 | 2.50533  |
| C  | -3.39830 | 0.61507  | 1.82896  |
| C  | -4.49134 | 1.22415  | 2.47096  |
| C  | -4.82908 | 0.87087  | 3.78839  |
| C  | -4.07319 | -0.10104 | 4.46852  |
| C  | -2.98708 | -0.72014 | 3.82835  |
| C  | 1.77901  | 0.90102  | 3.23114  |
| C  | 0.70801  | 1.58726  | 3.84739  |
| C  | 0.96013  | 2.62112  | 4.76435  |
| C  | 2.28050  | 2.99201  | 5.07029  |
| C  | 3.35047  | 2.32248  | 4.45310  |
| C  | 3.10294  | 1.28524  | 3.53725  |
| C  | 2.97001  | -1.45025 | 2.12790  |
| C  | 3.22622  | -2.25551 | 3.26009  |
| C  | 4.41706  | -2.99353 | 3.35565  |
| C  | 5.37381  | -2.92578 | 2.32693  |
| C  | 5.13467  | -2.11567 | 1.20481  |
| C  | 3.93724  | -1.38596 | 1.10501  |
| C  | -0.20055 | -2.44500 | -2.89959 |
| C  | -0.73662 | -1.55445 | -3.85731 |
| C  | -1.55363 | -2.03377 | -4.89462 |
| C  | -1.85615 | -3.40306 | -4.98460 |
| C  | -1.33661 | -4.29313 | -4.02965 |
| C  | -0.51610 | -3.81834 | -2.99172 |
| C  | 1.85925  | -3.28320 | -1.10538 |
| C  | 1.57761  | -4.01779 | 0.06382  |

|   |          |          |          |
|---|----------|----------|----------|
| C | 2.30784  | -5.17842 | 0.37368  |
| C | 3.33533  | -5.61237 | -0.47992 |
| C | 3.62151  | -4.88914 | -1.65180 |
| C | 2.88401  | -3.73620 | -1.96602 |
| C | 0.90280  | 2.08117  | -2.87525 |
| C | 1.54136  | 2.16803  | -4.13214 |
| C | 1.07874  | 3.07252  | -5.10193 |
| C | -0.02004 | 3.90426  | -4.81996 |
| C | -0.65610 | 3.82338  | -3.56962 |
| C | -0.20377 | 2.91180  | -2.59877 |
| C | 3.07658  | 1.80894  | -1.02281 |
| C | 3.01354  | 2.66387  | 0.09931  |
| C | 4.15443  | 3.37612  | 0.50772  |
| C | 5.36652  | 3.23438  | -0.18971 |
| C | 5.43662  | 2.37924  | -1.30374 |
| C | 4.29627  | 1.67260  | -1.72212 |
| H | -0.12206 | -1.15557 | 3.89261  |
| H | 0.41896  | -2.54211 | 2.86639  |
| H | 1.95484  | -0.63699 | -3.50520 |
| H | 3.09155  | -0.89854 | -2.12395 |
| H | -2.55924 | -2.27293 | -0.76424 |
| H | -3.65713 | -4.46232 | -1.29523 |
| H | -3.70169 | -6.30265 | 0.41947  |
| H | -2.64749 | -5.93572 | 2.66983  |
| H | -1.57832 | -3.75368 | 3.21344  |
| H | -3.12186 | 0.90085  | 0.80084  |
| H | -5.07630 | 1.98880  | 1.93411  |
| H | -5.68387 | 1.35481  | 4.29003  |
| H | -4.33263 | -0.38301 | 5.50273  |
| H | -2.41313 | -1.49049 | 4.37109  |
| H | -0.33452 | 1.32766  | 3.60601  |
| H | 0.11252  | 3.14913  | 5.23060  |
| H | 2.47481  | 3.80640  | 5.78796  |
| H | 4.39093  | 2.60387  | 4.68738  |
| H | 3.95327  | 0.76834  | 3.06520  |
| H | 2.49628  | -2.30008 | 4.08586  |
| H | 4.60284  | -3.62046 | 4.24386  |
| H | 6.30958  | -3.50410 | 2.40324  |
| H | 5.88266  | -2.05229 | 0.39760  |
| H | 3.75596  | -0.74623 | 0.22631  |
| H | -0.53035 | -0.47468 | -3.79336 |
| H | -1.96778 | -1.32392 | -5.62892 |
| H | -2.50076 | -3.77547 | -5.79813 |
| H | -1.56577 | -5.37028 | -4.09186 |
| H | -0.11408 | -4.53017 | -2.25364 |
| H | 0.76776  | -3.68396 | 0.73236  |
| H | 2.07331  | -5.74373 | 1.29048  |
| H | 3.91363  | -6.51859 | -0.23441 |
| H | 4.42081  | -5.22983 | -2.33115 |
| H | 3.10387  | -3.19325 | -2.90068 |
| H | 2.41318  | 1.53269  | -4.36390 |
| H | 1.58264  | 3.13083  | -6.08126 |
| H | -0.38089 | 4.61733  | -5.58010 |
| H | -1.52063 | 4.46898  | -3.34398 |
| H | -0.70964 | 2.83583  | -1.62235 |
| H | 2.06250  | 2.76734  | 0.65085  |

|   |          |          |          |
|---|----------|----------|----------|
| H | 4.09202  | 4.04119  | 1.38444  |
| H | 6.26141  | 3.79096  | 0.13535  |
| H | 6.38474  | 2.26408  | -1.85546 |
| H | 4.36547  | 1.01573  | -2.60599 |
| C | -2.59142 | 0.32540  | -1.86608 |
| C | -3.77156 | 0.49154  | -2.65482 |
| C | -0.71033 | 2.90577  | 1.16254  |
| C | -1.04174 | 4.21408  | 1.63259  |
| C | -6.12725 | 0.82094  | -4.23151 |
| C | -6.17429 | 0.10320  | -3.02204 |
| C | -5.01906 | -0.06080 | -2.24533 |
| C | -3.74540 | 1.21644  | -3.88089 |
| C | -4.90483 | 1.37576  | -4.65304 |
| H | -7.03794 | 0.94917  | -4.84011 |
| H | -7.12692 | -0.33521 | -2.67825 |
| H | -5.06469 | -0.62274 | -1.29837 |
| H | -2.79294 | 1.66208  | -4.21061 |
| H | -4.85492 | 1.94495  | -5.59730 |
| C | -1.70131 | 6.82605  | 2.57414  |
| C | -2.31268 | 5.69065  | 3.13707  |
| C | -1.99159 | 4.40573  | 2.67686  |
| C | -0.43573 | 5.37638  | 1.07506  |
| C | -0.76220 | 6.65785  | 1.53975  |
| H | -1.95692 | 7.83554  | 2.93714  |
| H | -3.05453 | 5.80858  | 3.94569  |
| H | -2.48171 | 3.52076  | 3.11389  |
| H | 0.29948  | 5.25328  | 0.26331  |
| H | -0.27704 | 7.53978  | 1.08727  |

\$vibrational spectrum

| # mode | symmetry | wave number | IR intensity | selection |
|--------|----------|-------------|--------------|-----------|
| rules  |          | cm** (-1)   | km/mol       | IR        |
| #      |          |             |              |           |
| RAMAN  |          |             |              |           |
| 1      |          | 0.00        | 0.00000      | - -       |
| 2      |          | 0.00        | 0.00000      | - -       |
| 3      |          | 0.00        | 0.00000      | - -       |
| 4      |          | 0.00        | 0.00000      | - -       |
| 5      |          | 0.00        | 0.00000      | - -       |
| 6      |          | 0.00        | 0.00000      | - -       |
| 7      | a        | 15.25       | 0.00944      | YES YES   |
| 8      | a        | 16.55       | 0.02340      | YES YES   |
| 9      | a        | 17.80       | 0.01367      | YES YES   |
| 10     | a        | 19.30       | 0.01641      | YES YES   |
| 11     | a        | 20.04       | 0.00792      | YES YES   |
| 12     | a        | 22.93       | 0.02213      | YES YES   |
| 13     | a        | 23.30       | 0.02157      | YES YES   |
| 14     | a        | 26.80       | 0.00288      | YES YES   |
| 15     | a        | 26.87       | 0.01374      | YES YES   |
| 16     | a        | 30.38       | 0.19010      | YES YES   |
| 17     | a        | 30.70       | 0.15127      | YES YES   |
| 18     | a        | 34.26       | 0.08204      | YES YES   |
| 19     | a        | 37.96       | 0.03428      | YES YES   |
| 20     | a        | 40.66       | 0.07730      | YES YES   |
| 21     | a        | 43.70       | 0.00790      | YES YES   |
| 22     | a        | 46.31       | 0.08035      | YES YES   |



|    |   |        |         |     |     |
|----|---|--------|---------|-----|-----|
| 23 | a | 47.40  | 0.10623 | YES | YES |
| 24 | a | 50.35  | 0.02872 | YES | YES |
| 25 | a | 50.68  | 0.06873 | YES | YES |
| 26 | a | 51.51  | 0.01286 | YES | YES |
| 27 | a | 52.60  | 0.45237 | YES | YES |
| 28 | a | 53.10  | 0.01133 | YES | YES |
| 29 | a | 57.10  | 0.00825 | YES | YES |
| 30 | a | 60.09  | 0.03975 | YES | YES |
| 31 | a | 60.57  | 0.22618 | YES | YES |
| 32 | a | 66.10  | 0.21308 | YES | YES |
| 33 | a | 67.91  | 0.19854 | YES | YES |
| 34 | a | 80.48  | 2.16842 | YES | YES |
| 35 | a | 80.90  | 0.42823 | YES | YES |
| 36 | a | 89.58  | 1.08432 | YES | YES |
| 37 | a | 95.30  | 0.53537 | YES | YES |
| 38 | a | 102.76 | 0.70443 | YES | YES |
| 39 | a | 104.00 | 1.73217 | YES | YES |
| 40 | a | 108.92 | 1.45955 | YES | YES |
| 41 | a | 112.64 | 1.28138 | YES | YES |
| 42 | a | 117.31 | 0.10068 | YES | YES |
| 43 | a | 122.38 | 1.66180 | YES | YES |
| 44 | a | 147.21 | 0.88898 | YES | YES |
| 45 | a | 150.04 | 1.93862 | YES | YES |
| 46 | a | 161.15 | 0.00536 | YES | YES |
| 47 | a | 161.59 | 0.88328 | YES | YES |
| 48 | a | 162.04 | 0.29980 | YES | YES |
| 49 | a | 166.79 | 0.08763 | YES | YES |
| 50 | a | 169.88 | 0.03545 | YES | YES |

## S7.10 Complex [Dd]<sup>+</sup>

SCF Energy (au) (RI)BP86/SV(P) -4006.3163698720  
SCF Energy (au) PBE0/def2-TZVPP -4005.659314730  
SCF Energy (au) PBE0/def2-TZVPP -4005.7137581801 (CH<sub>2</sub>Cl<sub>2</sub>  
Correction)  
Zero Point Energy (au) 0.9775050  
Chemical potential (kJ mol<sup>-1</sup>) 2273.10  
Dispersion correction (au) PBE0/def2-TZVPP -0.24387311

xyz coordinates

126

|    |          |          |          |
|----|----------|----------|----------|
| Ru | 0.11676  | 0.13636  | 0.20484  |
| C  | -1.42861 | 0.21323  | -1.10937 |
| C  | -0.33778 | 1.77626  | 0.92059  |
| P  | -1.17323 | -1.14464 | 1.77437  |
| P  | 1.54623  | -0.41845 | 2.13572  |
| P  | 1.00668  | -1.74233 | -1.32901 |
| P  | 1.64800  | 1.06666  | -1.39814 |
| C  | 0.27764  | -1.58380 | 2.88551  |
| C  | 2.26496  | -0.56488 | -2.08310 |
| C  | -1.95535 | -2.75655 | 1.32892  |
| C  | -2.47230 | -2.94477 | 0.02980  |
| C  | -3.11607 | -4.15115 | -0.29990 |
| C  | -3.24245 | -5.17223 | 0.65641  |
| C  | -2.72556 | -4.98842 | 1.95218  |
| C  | -2.08747 | -3.78463 | 2.29083  |
| C  | -2.44874 | -0.32818 | 2.82372  |
| C  | -3.31552 | 0.59491  | 2.20050  |
| C  | -4.35265 | 1.19386  | 2.93442  |
| C  | -4.53004 | 0.87922  | 4.29223  |
| C  | -3.66992 | -0.04075 | 4.91779  |
| C  | -2.63381 | -0.64622 | 4.18782  |
| C  | 1.80545  | 0.87252  | 3.44171  |
| C  | 0.69638  | 1.39057  | 4.14900  |
| C  | 0.88243  | 2.36630  | 5.14283  |
| C  | 2.17096  | 2.84723  | 5.43258  |
| C  | 3.27496  | 2.34522  | 4.72374  |
| C  | 3.09718  | 1.36190  | 3.73512  |
| C  | 3.15830  | -1.31432 | 2.14284  |
| C  | 3.42003  | -2.35002 | 3.06624  |
| C  | 4.68311  | -2.96290 | 3.10261  |
| C  | 5.69981  | -2.54124 | 2.22824  |
| C  | 5.44967  | -1.50367 | 1.31475  |
| C  | 4.18364  | -0.89538 | 1.26756  |
| C  | 0.04694  | -2.35555 | -2.78629 |
| C  | -0.38383 | -1.44648 | -3.77895 |
| C  | -1.11227 | -1.90452 | -4.88862 |
| C  | -1.42918 | -3.26749 | -5.01625 |
| C  | -1.01075 | -4.17420 | -4.02848 |
| C  | -0.27724 | -3.72387 | -2.91760 |
| C  | 1.95835  | -3.24316 | -0.82368 |
| C  | 1.39688  | -4.10465 | 0.14462  |

|   |          |          |          |
|---|----------|----------|----------|
| C | 2.04742  | -5.29946 | 0.49780  |
| C | 3.26966  | -5.64096 | -0.10464 |
| C | 3.83413  | -4.78926 | -1.07009 |
| C | 3.18072  | -3.60019 | -1.43332 |
| C | 1.03654  | 2.06821  | -2.82261 |
| C | 1.62022  | 1.98358  | -4.10616 |
| C | 1.18305  | 2.82954  | -5.13872 |
| C | 0.16970  | 3.77358  | -4.89577 |
| C | -0.40977 | 3.86539  | -3.61881 |
| C | 0.01588  | 3.01324  | -2.58615 |
| C | 3.16917  | 1.99606  | -0.90315 |
| C | 3.09972  | 2.90162  | 0.17677  |
| C | 4.22444  | 3.66519  | 0.53403  |
| C | 5.42781  | 3.52675  | -0.17780 |
| C | 5.50414  | 2.62573  | -1.25500 |
| C | 4.38029  | 1.86663  | -1.62047 |
| H | 0.12976  | -1.46322 | 3.97926  |
| H | 0.58392  | -2.63047 | 2.67538  |
| H | 2.34150  | -0.63577 | -3.18836 |
| H | 3.25945  | -0.77918 | -1.63835 |
| H | -2.37260 | -2.14285 | -0.72106 |
| H | -3.51841 | -4.28930 | -1.31642 |
| H | -3.74760 | -6.11645 | 0.39466  |
| H | -2.82595 | -5.78527 | 2.70732  |
| H | -1.70032 | -3.65085 | 3.31519  |
| H | -3.17844 | 0.84343  | 1.13557  |
| H | -5.01884 | 1.91839  | 2.43937  |
| H | -5.34176 | 1.35321  | 4.86799  |
| H | -3.80697 | -0.29292 | 5.98212  |
| H | -1.97669 | -1.37143 | 4.69603  |
| H | -0.32660 | 1.04104  | 3.93329  |
| H | 0.00858  | 2.75059  | 5.69384  |
| H | 2.31457  | 3.61051  | 6.21466  |
| H | 4.29043  | 2.71098  | 4.94773  |
| H | 3.97734  | 0.96666  | 3.20466  |
| H | 2.64374  | -2.68012 | 3.77570  |
| H | 4.87563  | -3.77170 | 3.82627  |
| H | 6.69163  | -3.02076 | 2.26305  |
| H | 6.24508  | -1.16131 | 0.63291  |
| H | 4.00343  | -0.06949 | 0.55979  |
| H | -0.16169 | -0.37138 | -3.69372 |
| H | -1.44099 | -1.18414 | -5.65465 |
| H | -2.00215 | -3.62297 | -5.88817 |
| H | -1.24723 | -5.24675 | -4.12345 |
| H | 0.05357  | -4.45188 | -2.16090 |
| H | 0.42661  | -3.85687 | 0.60686  |
| H | 1.59251  | -5.96801 | 1.24687  |
| H | 3.78169  | -6.57663 | 0.17338  |
| H | 4.78772  | -5.05682 | -1.55400 |
| H | 3.62793  | -2.96070 | -2.21181 |
| H | 2.42748  | 1.26231  | -4.31570 |
| H | 1.64292  | 2.75367  | -6.13765 |
| H | -0.16742 | 4.44083  | -5.70591 |
| H | -1.20494 | 4.60185  | -3.41999 |
| H | -0.45048 | 3.08587  | -1.59181 |
| H | 2.15778  | 3.01515  | 0.73589  |

|   |          |          |          |
|---|----------|----------|----------|
| H | 4.15728  | 4.37301  | 1.37607  |
| H | 6.30940  | 4.12559  | 0.10352  |
| H | 6.44368  | 2.51839  | -1.82159 |
| H | 4.45478  | 1.17743  | -2.47843 |
| C | -2.42396 | 0.30742  | -1.84766 |
| C | -3.56211 | 0.41358  | -2.71172 |
| C | -0.62414 | 2.98370  | 1.41067  |
| H | 0.10211  | 3.34047  | 2.17280  |
| C | -1.75151 | 3.88416  | 1.10818  |
| C | -5.81987 | 0.63306  | -4.42280 |
| C | -5.90550 | -0.10540 | -3.22862 |
| C | -4.79401 | -0.21491 | -2.38141 |
| C | -3.49280 | 1.15763  | -3.92160 |
| C | -4.60952 | 1.26393  | -4.76292 |
| H | -6.69609 | 0.71886  | -5.08616 |
| H | -6.85161 | -0.60048 | -2.95322 |
| H | -4.86705 | -0.79068 | -1.44470 |
| H | -2.54734 | 1.65806  | -4.18571 |
| H | -4.53592 | 1.84791  | -5.69559 |
| C | -3.88728 | 5.67601  | 0.57625  |
| C | -2.93195 | 5.98550  | 1.55985  |
| C | -1.87515 | 5.10110  | 1.82325  |
| C | -2.71984 | 3.58291  | 0.11466  |
| C | -3.77353 | 4.47171  | -0.14355 |
| H | -4.71623 | 6.37205  | 0.36841  |
| H | -3.00821 | 6.92719  | 2.12832  |
| H | -1.12983 | 5.35366  | 2.59636  |
| H | -2.63827 | 2.64611  | -0.46229 |
| H | -4.51439 | 4.21935  | -0.92023 |

\$vibrational spectrum

| # mode | symmetry | wave number | IR intensity | selection |     |
|--------|----------|-------------|--------------|-----------|-----|
| rules  |          | cm** (-1)   | km/mol       | IR        |     |
| #      |          |             |              |           |     |
| RAMAN  |          |             |              |           |     |
| 1      |          | 0.00        | 0.00000      | -         | -   |
| 2      |          | 0.00        | 0.00000      | -         | -   |
| 3      |          | 0.00        | 0.00000      | -         | -   |
| 4      |          | 0.00        | 0.00000      | -         | -   |
| 5      |          | 0.00        | 0.00000      | -         | -   |
| 6      |          | 0.00        | 0.00000      | -         | -   |
| 7      | a        | 11.81       | 0.03356      | YES       | YES |
| 8      | a        | 14.41       | 0.01212      | YES       | YES |
| 9      | a        | 17.13       | 0.02411      | YES       | YES |
| 10     | a        | 19.33       | 0.02770      | YES       | YES |
| 11     | a        | 22.33       | 0.01069      | YES       | YES |
| 12     | a        | 22.66       | 0.02580      | YES       | YES |
| 13     | a        | 25.97       | 0.03545      | YES       | YES |
| 14     | a        | 28.83       | 0.01417      | YES       | YES |
| 15     | a        | 30.87       | 0.00881      | YES       | YES |
| 16     | a        | 32.87       | 0.00058      | YES       | YES |
| 17     | a        | 33.95       | 0.02518      | YES       | YES |
| 18     | a        | 38.16       | 0.09023      | YES       | YES |
| 19     | a        | 39.06       | 0.06645      | YES       | YES |
| 20     | a        | 40.25       | 0.02522      | YES       | YES |
| 21     | a        | 42.69       | 0.06671      | YES       | YES |

|    |   |        |         |     |     |
|----|---|--------|---------|-----|-----|
| 22 | a | 42.84  | 0.12992 | YES | YES |
| 23 | a | 45.89  | 0.07015 | YES | YES |
| 24 | a | 46.77  | 0.01759 | YES | YES |
| 25 | a | 48.68  | 0.17605 | YES | YES |
| 26 | a | 52.71  | 0.01235 | YES | YES |
| 27 | a | 54.71  | 0.01624 | YES | YES |
| 28 | a | 58.91  | 0.05827 | YES | YES |
| 29 | a | 59.04  | 0.03245 | YES | YES |
| 30 | a | 60.14  | 0.35697 | YES | YES |
| 31 | a | 62.15  | 0.03997 | YES | YES |
| 32 | a | 67.26  | 0.30118 | YES | YES |
| 33 | a | 68.14  | 0.08979 | YES | YES |
| 34 | a | 76.21  | 0.83817 | YES | YES |
| 35 | a | 80.49  | 1.08663 | YES | YES |
| 36 | a | 83.74  | 0.27596 | YES | YES |
| 37 | a | 90.71  | 0.15417 | YES | YES |
| 38 | a | 95.75  | 1.01832 | YES | YES |
| 39 | a | 103.57 | 0.45290 | YES | YES |
| 40 | a | 109.26 | 1.80749 | YES | YES |
| 41 | a | 115.04 | 1.76053 | YES | YES |
| 42 | a | 117.42 | 0.46659 | YES | YES |
| 43 | a | 122.92 | 0.62742 | YES | YES |
| 44 | a | 142.93 | 1.21886 | YES | YES |
| 45 | a | 148.88 | 0.23540 | YES | YES |
| 46 | a | 156.96 | 0.20793 | YES | YES |
| 47 | a | 161.10 | 0.65991 | YES | YES |
| 48 | a | 163.64 | 0.16685 | YES | YES |
| 49 | a | 168.23 | 1.03451 | YES | YES |
| 50 | a | 170.68 | 1.23554 | YES | YES |

## S7.11 Complex [Fd]<sup>+</sup>

SCF Energy (au) (RI)BP86/SV(P) -4006.3208473510  
SCF Energy (au) PBE0/def2-TZVPP -4005.665619968  
SCF Energy (au) PBE0/def2-TZVPP -4005.7168549260 (CH<sub>2</sub>Cl<sub>2</sub>  
Correction)  
Zero Point Energy (au) 0.9777822  
Chemical potential (kJ mol<sup>-1</sup>) 2276.11  
Dispersion correction (au) PBE0/def2-TZVPP -0.24495152

xyz coordinates

126

|    |          |          |          |
|----|----------|----------|----------|
| C  | 0.36510  | -1.87027 | 0.29365  |
| C  | -1.66002 | -0.16722 | -2.74572 |
| C  | 1.03384  | 0.76232  | -3.63289 |
| C  | 0.61762  | -2.03899 | -3.08413 |
| C  | 1.62275  | 0.23323  | 2.62828  |
| C  | -0.91722 | 1.72554  | 3.15986  |
| C  | -0.95301 | -1.12329 | 3.34944  |
| C  | 3.59523  | -0.73398 | 0.62277  |
| P  | -2.21615 | -0.22817 | -0.94951 |
| C  | -0.06846 | 1.97074  | -0.59836 |
| P  | 2.19921  | 0.44329  | 0.84667  |
| P  | 0.18426  | -0.36337 | -2.44832 |
| P  | -0.22571 | 0.23453  | 2.32209  |
| Ru | 0.00013  | 0.13860  | -0.09116 |
| C  | 0.65870  | -3.06134 | 0.51065  |
| C  | -3.11439 | -1.82587 | -0.75937 |
| C  | -3.57287 | 1.01858  | -0.77147 |
| C  | 3.01804  | 2.09729  | 0.80846  |
| H  | -1.84352 | 0.85192  | -3.14852 |
| H  | -2.12054 | -0.91638 | -3.42410 |
| H  | 1.98007  | 1.02586  | 3.31849  |
| H  | 1.95698  | -0.75280 | 3.01187  |
| C  | -2.12954 | -3.18064 | 4.89257  |
| C  | -0.83601 | -3.34188 | 4.36803  |
| C  | -0.25141 | -2.32426 | 3.59562  |
| C  | -2.25587 | -0.96923 | 3.87804  |
| C  | -2.83851 | -1.99326 | 4.64235  |
| H  | -2.58409 | -3.97974 | 5.50084  |
| H  | -0.27097 | -4.26928 | 4.55459  |
| H  | 0.75272  | -2.48739 | 3.17734  |
| H  | -2.82088 | -0.03922 | 3.70745  |
| H  | -3.85176 | -1.85432 | 5.05357  |
| C  | -2.18694 | 3.83812  | 4.53472  |
| C  | -1.03314 | 3.23976  | 5.07284  |
| C  | -0.40725 | 2.18023  | 4.39685  |
| C  | -2.06933 | 2.33589  | 2.62016  |
| C  | -2.70686 | 3.38161  | 3.31234  |
| H  | -2.68295 | 4.66158  | 5.07410  |
| H  | -0.62330 | 3.59205  | 6.03351  |
| H  | 0.47398  | 1.69965  | 4.85319  |
| H  | -2.47541 | 1.98912  | 1.65538  |

|   |          |          |          |
|---|----------|----------|----------|
| H | -3.61163 | 3.84360  | 2.88549  |
| C | 5.77869  | -2.48020 | 0.26124  |
| C | 4.74765  | -2.43494 | -0.69194 |
| C | 3.65493  | -1.56923 | -0.51062 |
| C | 4.63512  | -0.78238 | 1.57999  |
| C | 5.71960  | -1.65571 | 1.39998  |
| H | 6.63216  | -3.16348 | 0.11995  |
| H | 4.78206  | -3.08798 | -1.57870 |
| H | 2.83295  | -1.56526 | -1.24295 |
| H | 4.60879  | -0.12833 | 2.46811  |
| H | 6.52583  | -1.68839 | 2.15102  |
| C | 4.20235  | 4.66037  | 0.68206  |
| C | 4.83888  | 3.55955  | 0.08529  |
| C | 4.25211  | 2.28340  | 0.14596  |
| C | 2.37631  | 3.21303  | 1.39198  |
| C | 2.97000  | 4.48367  | 1.33511  |
| H | 4.66661  | 5.65909  | 0.63847  |
| H | 5.80810  | 3.68881  | -0.42400 |
| H | 4.77170  | 1.42613  | -0.31137 |
| H | 1.40105  | 3.10148  | 1.89430  |
| H | 2.45905  | 5.34295  | 1.79839  |
| C | 1.27838  | -4.60946 | -4.04681 |
| C | 0.13705  | -4.42632 | -3.24706 |
| C | -0.19021 | -3.15167 | -2.75891 |
| C | 1.76619  | -2.22810 | -3.88517 |
| C | 2.09278  | -3.50937 | -4.36172 |
| H | 1.53255  | -5.61276 | -4.42574 |
| H | -0.50388 | -5.28551 | -2.99247 |
| H | -1.07857 | -3.03234 | -2.11937 |
| H | 2.40548  | -1.37279 | -4.15525 |
| H | 2.98584  | -3.64268 | -4.99409 |
| C | 2.40982  | 2.40991  | -5.46438 |
| C | 1.19657  | 1.80310  | -5.83625 |
| C | 0.51283  | 0.97836  | -4.92828 |
| C | 2.25065  | 1.37526  | -3.26523 |
| C | 2.93722  | 2.19297  | -4.18002 |
| H | 2.94570  | 3.05471  | -6.17992 |
| H | 0.78057  | 1.96896  | -6.84341 |
| H | -0.42825 | 0.49562  | -5.24056 |
| H | 2.66075  | 1.22478  | -2.25267 |
| H | 3.88576  | 2.66819  | -3.88193 |
| C | -4.59293 | -4.20211 | -0.41030 |
| C | -3.65850 | -3.80462 | 0.55997  |
| C | -2.91444 | -2.62280 | 0.38670  |
| C | -4.06418 | -2.22549 | -1.72916 |
| C | -4.79392 | -3.41160 | -1.55728 |
| H | -5.17129 | -5.13069 | -0.27384 |
| H | -3.49868 | -4.41758 | 1.46149  |
| H | -2.16665 | -2.32885 | 1.13824  |
| H | -4.25180 | -1.60321 | -2.62050 |
| H | -5.52994 | -3.71627 | -2.31916 |
| C | -5.61099 | 2.94518  | -0.40990 |
| C | -4.45583 | 3.26786  | -1.14359 |
| C | -3.43914 | 2.31494  | -1.31921 |
| C | -4.73287 | 0.70387  | -0.02663 |
| C | -5.74357 | 1.66398  | 0.15172  |

|   |          |          |          |
|---|----------|----------|----------|
| H | -6.40946 | 3.69348  | -0.27714 |
| H | -4.33776 | 4.27163  | -1.58240 |
| H | -2.53193 | 2.59929  | -1.87542 |
| H | -4.85751 | -0.29969 | 0.40982  |
| H | -6.64631 | 1.40145  | 0.72746  |
| C | 0.98249  | -4.42839 | 0.78287  |
| C | 1.62063  | -7.14012 | 1.34761  |
| C | 2.56689  | -6.12609 | 1.58249  |
| C | 2.25622  | -4.78732 | 1.30518  |
| C | 0.03810  | -5.46651 | 0.55115  |
| C | 0.35628  | -6.80281 | 0.83095  |
| H | 1.86813  | -8.19176 | 1.56661  |
| H | 3.56074  | -6.38277 | 1.98560  |
| H | 3.00256  | -3.99665 | 1.48232  |
| H | -0.95436 | -5.20336 | 0.15174  |
| H | -0.39093 | -7.59242 | 0.64514  |
| C | 0.11201  | 3.15961  | -1.18339 |
| C | -0.37452 | 4.52357  | -0.92130 |
| H | 0.79239  | 3.07415  | -2.06096 |
| C | -1.26561 | 7.19061  | -0.50563 |
| C | -1.51156 | 6.19766  | 0.46085  |
| C | -1.07261 | 4.88172  | 0.25842  |
| C | -0.12622 | 5.53619  | -1.88301 |
| C | -0.56843 | 6.85154  | -1.67848 |
| H | -1.61010 | 8.22476  | -0.34220 |
| H | -2.04757 | 6.45350  | 1.39012  |
| H | -1.25846 | 4.11856  | 1.02923  |
| H | 0.42282  | 5.28108  | -2.80523 |
| H | -0.36327 | 7.62044  | -2.44166 |

\$vibrational spectrum

| # mode | symmetry | wave number | IR intensity | selection |
|--------|----------|-------------|--------------|-----------|
| rules  |          | cm** (-1)   | km/mol       | IR        |
| #      |          |             |              |           |
| RAMAN  |          |             |              |           |
| 1      |          | 0.00        | 0.00000      | - -       |
| 2      |          | 0.00        | 0.00000      | - -       |
| 3      |          | 0.00        | 0.00000      | - -       |
| 4      |          | 0.00        | 0.00000      | - -       |
| 5      |          | 0.00        | 0.00000      | - -       |
| 6      |          | 0.00        | 0.00000      | - -       |
| 7      | a        | 11.62       | 0.01362      | YES YES   |
| 8      | a        | 17.05       | 0.07188      | YES YES   |
| 9      | a        | 17.78       | 0.00109      | YES YES   |
| 10     | a        | 19.86       | 0.05157      | YES YES   |
| 11     | a        | 22.26       | 0.03034      | YES YES   |
| 12     | a        | 24.90       | 0.00370      | YES YES   |
| 13     | a        | 27.41       | 0.04637      | YES YES   |
| 14     | a        | 28.29       | 0.05288      | YES YES   |
| 15     | a        | 29.30       | 0.04856      | YES YES   |
| 16     | a        | 31.86       | 0.15108      | YES YES   |
| 17     | a        | 33.95       | 0.05342      | YES YES   |
| 18     | a        | 34.52       | 0.09691      | YES YES   |
| 19     | a        | 37.22       | 0.06735      | YES YES   |
| 20     | a        | 41.14       | 0.10546      | YES YES   |
| 21     | a        | 43.88       | 0.02819      | YES YES   |



|    |   |        |         |     |     |
|----|---|--------|---------|-----|-----|
| 22 | a | 46.52  | 0.05524 | YES | YES |
| 23 | a | 47.34  | 0.03431 | YES | YES |
| 24 | a | 49.77  | 0.10881 | YES | YES |
| 25 | a | 53.03  | 0.09675 | YES | YES |
| 26 | a | 53.88  | 0.11859 | YES | YES |
| 27 | a | 54.54  | 0.02808 | YES | YES |
| 28 | a | 57.53  | 0.13203 | YES | YES |
| 29 | a | 59.18  | 0.41566 | YES | YES |
| 30 | a | 60.68  | 0.51487 | YES | YES |
| 31 | a | 63.52  | 0.17132 | YES | YES |
| 32 | a | 66.31  | 0.02627 | YES | YES |
| 33 | a | 68.16  | 0.01977 | YES | YES |
| 34 | a | 77.77  | 0.04936 | YES | YES |
| 35 | a | 85.61  | 0.01358 | YES | YES |
| 36 | a | 88.35  | 0.03362 | YES | YES |
| 37 | a | 96.63  | 0.15911 | YES | YES |
| 38 | a | 102.86 | 2.00384 | YES | YES |
| 39 | a | 105.40 | 0.55473 | YES | YES |
| 40 | a | 109.11 | 1.49956 | YES | YES |
| 41 | a | 109.70 | 4.63037 | YES | YES |
| 42 | a | 119.77 | 2.33180 | YES | YES |
| 43 | a | 128.66 | 0.64664 | YES | YES |
| 44 | a | 147.83 | 0.04790 | YES | YES |
| 45 | a | 150.01 | 0.76571 | YES | YES |
| 46 | a | 161.21 | 0.50737 | YES | YES |
| 47 | a | 166.61 | 0.24600 | YES | YES |
| 48 | a | 176.48 | 1.24310 | YES | YES |
| 49 | a | 183.63 | 1.67869 | YES | YES |
| 50 | a | 185.19 | 0.55041 | YES | YES |

## S7.12 Complex [3d]

SCF Energy (au) (RI)BP86/SV(P) -4005.8933626370  
SCF Energy (au) PBE0/def2-TZVPP -4005.241867445  
SCF Energy (au) PBE0/def2-TZVPP -4005.2682441185 (CH<sub>2</sub>Cl<sub>2</sub>  
Correction)  
Zero Point Energy (au) 0.9651649  
Chemical potential (kJ mol<sup>-1</sup>) 2232.87  
Dispersion correction (au) PBE0/def2-TZVPP -0.24012730

xyz coordinates

125

|    |          |          |          |
|----|----------|----------|----------|
| C  | 0.19447  | -2.01065 | 0.59673  |
| C  | -1.53269 | 0.16522  | -2.75363 |
| C  | 1.38699  | 0.71938  | -3.37859 |
| C  | 0.39504  | -1.96700 | -3.27196 |
| C  | 1.49721  | -0.09645 | 2.67367  |
| C  | -0.65547 | 1.86630  | 3.14419  |
| C  | -1.33152 | -0.88672 | 3.35425  |
| C  | 3.58334  | -0.78815 | 0.64095  |
| P  | -2.18703 | -0.28412 | -1.04357 |
| C  | -0.13166 | 1.91803  | -0.57589 |
| P  | 2.09573  | 0.27949  | 0.92997  |
| P  | 0.24294  | -0.34098 | -2.38427 |
| P  | -0.31390 | 0.24717  | 2.30412  |
| Ru | -0.03449 | -0.06024 | -0.03753 |
| C  | 0.39241  | -3.13913 | 1.09974  |
| C  | -3.02413 | -1.91700 | -1.29342 |
| C  | -3.64255 | 0.82093  | -0.70193 |
| C  | 2.85287  | 1.96353  | 0.98076  |
| H  | -1.57493 | 1.27065  | -2.84038 |
| H  | -2.01198 | -0.31437 | -3.63349 |
| H  | 1.96843  | 0.43191  | 3.52936  |
| H  | 1.62028  | -1.19439 | 2.78727  |
| C  | -3.02329 | -2.51712 | 4.92455  |
| C  | -1.62879 | -2.59791 | 5.07142  |
| C  | -0.78553 | -1.78781 | 4.28988  |
| C  | -2.73485 | -0.81386 | 3.20746  |
| C  | -3.57445 | -1.62299 | 3.98887  |
| H  | -3.68270 | -3.15331 | 5.53812  |
| H  | -1.18669 | -3.30183 | 5.79568  |
| H  | 0.30539  | -1.87330 | 4.41505  |
| H  | -3.17783 | -0.11523 | 2.47694  |
| H  | -4.66802 | -1.55418 | 3.86511  |
| C  | -1.22338 | 4.30544  | 4.44471  |
| C  | -0.65568 | 3.23871  | 5.16704  |
| C  | -0.37730 | 2.02405  | 4.52198  |
| C  | -1.22849 | 2.93503  | 2.42751  |
| C  | -1.51087 | 4.15002  | 3.07941  |
| H  | -1.44378 | 5.25949  | 4.95247  |
| H  | -0.43561 | 3.35150  | 6.24199  |
| H  | 0.04567  | 1.18673  | 5.10355  |
| H  | -1.42892 | 2.81908  | 1.35093  |

|   |          |          |          |
|---|----------|----------|----------|
| H | -1.95345 | 4.98150  | 2.50690  |
| C | 5.83600  | -2.42331 | 0.17277  |
| C | 4.62541  | -2.68352 | -0.49173 |
| C | 3.50083  | -1.87236 | -0.25645 |
| C | 4.80467  | -0.52727 | 1.30157  |
| C | 5.92291  | -1.34513 | 1.07192  |
| H | 6.71698  | -3.06061 | -0.01188 |
| H | 4.55109  | -3.52583 | -1.19951 |
| H | 2.54289  | -2.08554 | -0.75610 |
| H | 4.88817  | 0.32828  | 1.99248  |
| H | 6.87134  | -1.13383 | 1.59359  |
| C | 4.07953  | 4.50991  | 0.89913  |
| C | 3.99880  | 3.72649  | -0.26661 |
| C | 3.38501  | 2.46626  | -0.22885 |
| C | 2.91847  | 2.76261  | 2.14005  |
| C | 3.53106  | 4.02902  | 2.09848  |
| H | 4.56049  | 5.50172  | 0.86773  |
| H | 4.40674  | 4.10394  | -1.21837 |
| H | 3.31437  | 1.86909  | -1.15310 |
| H | 2.48450  | 2.41496  | 3.09015  |
| H | 3.57549  | 4.64070  | 3.01491  |
| C | 0.51947  | -4.44078 | -4.62960 |
| C | 0.39958  | -4.40819 | -3.23118 |
| C | 0.33560  | -3.17743 | -2.55177 |
| C | 0.51528  | -2.00529 | -4.68145 |
| C | 0.57516  | -3.23558 | -5.35424 |
| H | 0.57037  | -5.40654 | -5.16006 |
| H | 0.35362  | -5.34667 | -2.65450 |
| H | 0.23703  | -3.15137 | -1.45319 |
| H | 0.56874  | -1.06745 | -5.25917 |
| H | 0.66904  | -3.25319 | -6.45315 |
| C | 3.27826  | 2.30043  | -4.76878 |
| C | 1.94666  | 2.73040  | -4.65004 |
| C | 1.00678  | 1.94698  | -3.95700 |
| C | 2.73135  | 0.29581  | -3.49822 |
| C | 3.66900  | 1.07974  | -4.18902 |
| H | 4.01354  | 2.91690  | -5.31224 |
| H | 1.63066  | 3.68980  | -5.09133 |
| H | -0.02717 | 2.31088  | -3.86620 |
| H | 3.05160  | -0.65951 | -3.04973 |
| H | 4.71199  | 0.73216  | -4.27496 |
| C | -4.35007 | -4.39073 | -1.60530 |
| C | -3.52614 | -4.16758 | -0.49042 |
| C | -2.86364 | -2.93630 | -0.33253 |
| C | -3.86229 | -2.14494 | -2.40904 |
| C | -4.51794 | -3.37580 | -2.56552 |
| H | -4.86319 | -5.35899 | -1.73058 |
| H | -3.38355 | -4.96058 | 0.26206  |
| H | -2.19117 | -2.77162 | 0.52444  |
| H | -4.01747 | -1.35315 | -3.16117 |
| H | -5.16522 | -3.54365 | -3.44255 |
| C | -5.82437 | 2.51467  | -0.07182 |
| C | -4.63972 | 3.05277  | -0.60364 |
| C | -3.55338 | 2.21648  | -0.90941 |
| C | -4.83560 | 0.28829  | -0.16097 |
| C | -5.91589 | 1.13099  | 0.15320  |

|   |          |          |          |
|---|----------|----------|----------|
| H | -6.67518 | 3.17366  | 0.16893  |
| H | -4.55136 | 4.13777  | -0.77914 |
| H | -2.61643 | 2.65656  | -1.28621 |
| H | -4.92940 | -0.79607 | 0.00884  |
| H | -6.83978 | 0.69698  | 0.57105  |
| C | 0.58918  | -4.44757 | 1.64246  |
| C | 0.97708  | -7.06470 | 2.71548  |
| C | 2.01679  | -6.41736 | 2.02250  |
| C | 1.83013  | -5.13214 | 1.49495  |
| C | -0.44834 | -5.11819 | 2.35341  |
| C | -0.25480 | -6.40421 | 2.87725  |
| H | 1.12668  | -8.07609 | 3.12877  |
| H | 2.98947  | -6.92207 | 1.89205  |
| H | 2.65032  | -4.62933 | 0.95774  |
| H | -1.41188 | -4.60275 | 2.49428  |
| H | -1.07735 | -6.89849 | 3.42227  |
| C | -0.14614 | 3.11547  | -0.93682 |
| C | -0.17539 | 4.50138  | -1.27830 |
| C | -0.25008 | 7.28255  | -1.93339 |
| C | 0.50617  | 6.82594  | -0.83713 |
| C | 0.54654  | 5.46348  | -0.51225 |
| C | -0.93442 | 4.98583  | -2.38425 |
| C | -0.96955 | 6.35093  | -2.70357 |
| H | -0.27836 | 8.35573  | -2.18525 |
| H | 1.07590  | 7.54583  | -0.22459 |
| H | 1.14344  | 5.11272  | 0.34405  |
| H | -1.50743 | 4.26773  | -2.99469 |
| H | -1.56827 | 6.69249  | -3.56545 |

\$vibrational spectrum

| # mode | symmetry | wave number | IR intensity | selection |     |
|--------|----------|-------------|--------------|-----------|-----|
| rules  |          | cm** (-1)   | km/mol       | IR        |     |
| #      |          |             |              |           |     |
| RAMAN  |          |             |              |           |     |
| 1      |          | 0.00        | 0.00000      | -         | -   |
| 2      |          | 0.00        | 0.00000      | -         | -   |
| 3      |          | 0.00        | 0.00000      | -         | -   |
| 4      |          | 0.00        | 0.00000      | -         | -   |
| 5      |          | 0.00        | 0.00000      | -         | -   |
| 6      |          | 0.00        | 0.00000      | -         | -   |
| 7      | a        | 6.81        | 0.05101      | YES       | YES |
| 8      | a        | 9.99        | 0.04010      | YES       | YES |
| 9      | a        | 14.20       | 0.08817      | YES       | YES |
| 10     | a        | 16.28       | 0.15328      | YES       | YES |
| 11     | a        | 18.53       | 0.03270      | YES       | YES |
| 12     | a        | 19.57       | 0.14714      | YES       | YES |
| 13     | a        | 22.90       | 0.04275      | YES       | YES |
| 14     | a        | 24.95       | 0.07147      | YES       | YES |
| 15     | a        | 25.67       | 0.01497      | YES       | YES |
| 16     | a        | 27.61       | 0.02195      | YES       | YES |
| 17     | a        | 29.63       | 0.01211      | YES       | YES |
| 18     | a        | 31.05       | 0.17992      | YES       | YES |
| 19     | a        | 33.41       | 0.13450      | YES       | YES |
| 20     | a        | 36.08       | 0.06095      | YES       | YES |
| 21     | a        | 36.72       | 0.03605      | YES       | YES |
| 22     | a        | 37.95       | 0.02067      | YES       | YES |

|    |   |        |         |     |     |
|----|---|--------|---------|-----|-----|
| 23 | a | 41.98  | 0.07891 | YES | YES |
| 24 | a | 43.21  | 0.01982 | YES | YES |
| 25 | a | 44.67  | 0.15931 | YES | YES |
| 26 | a | 47.75  | 0.17275 | YES | YES |
| 27 | a | 49.20  | 0.04202 | YES | YES |
| 28 | a | 51.85  | 0.06858 | YES | YES |
| 29 | a | 55.39  | 0.13007 | YES | YES |
| 30 | a | 57.55  | 0.19101 | YES | YES |
| 31 | a | 58.46  | 0.70862 | YES | YES |
| 32 | a | 60.82  | 0.04216 | YES | YES |
| 33 | a | 63.44  | 0.01731 | YES | YES |
| 34 | a | 74.17  | 0.13070 | YES | YES |
| 35 | a | 79.77  | 0.19633 | YES | YES |
| 36 | a | 95.81  | 0.37164 | YES | YES |
| 37 | a | 102.76 | 2.19500 | YES | YES |
| 38 | a | 105.39 | 1.47177 | YES | YES |
| 39 | a | 108.63 | 0.41643 | YES | YES |
| 40 | a | 110.17 | 2.93198 | YES | YES |
| 41 | a | 118.73 | 3.04167 | YES | YES |
| 42 | a | 120.65 | 2.95289 | YES | YES |
| 43 | a | 126.58 | 0.08185 | YES | YES |
| 44 | a | 146.18 | 0.17359 | YES | YES |
| 45 | a | 150.32 | 0.30922 | YES | YES |
| 46 | a | 159.81 | 0.46912 | YES | YES |
| 47 | a | 161.76 | 0.18764 | YES | YES |
| 48 | a | 164.39 | 0.07166 | YES | YES |
| 49 | a | 178.28 | 1.66992 | YES | YES |
| 50 | a | 189.82 | 0.27404 | YES | YES |

### S7.13 Complex [4d]<sup>+</sup>

SCF Energy (au) (RI)BP86/SV(P) -4006.3534482470  
SCF Energy (au) PBE0/def2-TZVPP -4005.699037285  
SCF Energy (au) PBE0/def2-TZVPP -4005.7515249004 (CH<sub>2</sub>Cl<sub>2</sub>  
Correction)  
Zero Point Energy (au) 0.9801172  
Chemical potential (kJ mol<sup>-1</sup>) 2290.64  
Dispersion correction (au) PBE0/def2-TZVPP -0.24846821

xyz coordinates

126

|   |          |          |         |
|---|----------|----------|---------|
| C | 1.75127  | -2.15532 | 2.58223 |
| C | 2.17441  | -2.25872 | 3.92859 |
| H | 2.30392  | -1.35323 | 4.54557 |
| C | 2.45113  | -3.51381 | 4.49124 |
| H | 2.77841  | -3.58184 | 5.54180 |
| C | 2.32369  | -4.67964 | 3.71266 |
| H | 2.54729  | -5.66468 | 4.15416 |
| C | 1.91919  | -4.58247 | 2.37221 |
| H | 1.82199  | -5.49042 | 1.75514 |
| C | 1.63181  | -3.32644 | 1.80664 |
| H | 1.31099  | -3.25952 | 0.75709 |
| C | 3.08513  | 0.28353  | 2.13751 |
| C | 4.13310  | -0.09575 | 1.26648 |
| H | 3.92965  | -0.77637 | 0.42261 |
| C | 5.43590  | 0.38588  | 1.47260 |
| H | 6.24547  | 0.07520  | 0.79194 |
| C | 5.70812  | 1.25438  | 2.54524 |
| H | 6.73154  | 1.62990  | 2.70786 |
| C | 4.67256  | 1.63433  | 3.41505 |
| H | 4.88173  | 2.30609  | 4.26381 |
| C | 3.36684  | 1.14943  | 3.21624 |
| H | 2.57337  | 1.44448  | 3.92254 |
| C | -2.37495 | 1.62215  | 2.38842 |
| C | -3.39212 | 2.03083  | 1.49874 |
| H | -3.50791 | 1.53086  | 0.52337 |
| C | -4.28387 | 3.05722  | 1.85694 |
| H | -5.08139 | 3.35533  | 1.15663 |
| C | -4.16124 | 3.69471  | 3.10252 |
| H | -4.86026 | 4.49886  | 3.38509 |
| C | -3.14691 | 3.29746  | 3.99116 |
| H | -3.04682 | 3.78993  | 4.97221 |
| C | -2.26366 | 2.26320  | 3.64123 |
| H | -1.49124 | 1.95298  | 4.36336 |
| C | -2.29423 | -1.17922 | 2.77578 |
| C | -1.67809 | -2.18046 | 3.55877 |
| H | -0.58619 | -2.20159 | 3.69413 |
| C | -2.44918 | -3.18501 | 4.16881 |
| H | -1.94859 | -3.95289 | 4.78071 |
| C | -3.84360 | -3.20973 | 4.00269 |
| H | -4.44710 | -3.99401 | 4.48818 |
| C | -4.46422 | -2.22190 | 3.21850 |

|   |          |          |          |
|---|----------|----------|----------|
| H | -5.55874 | -2.22573 | 3.08662  |
| C | -3.69792 | -1.21397 | 2.61075  |
| H | -4.20946 | -0.43908 | 2.01840  |
| C | 0.22379  | 0.33605  | 3.03526  |
| H | 0.16407  | -0.07038 | 4.06761  |
| H | 0.45989  | 1.42192  | 3.07921  |
| C | -1.05664 | 0.26610  | -3.54075 |
| C | -0.00388 | 0.95323  | -4.18475 |
| H | 0.56221  | 1.73837  | -3.65786 |
| C | 0.34154  | 0.63763  | -5.50873 |
| H | 1.16019  | 1.18594  | -6.00233 |
| C | -0.34652 | -0.37551 | -6.19791 |
| H | -0.07216 | -0.62165 | -7.23664 |
| C | -1.38326 | -1.07457 | -5.55728 |
| H | -1.92775 | -1.87064 | -6.09103 |
| C | -1.73836 | -0.75828 | -4.23551 |
| H | -2.56107 | -1.30742 | -3.75000 |
| C | -3.32090 | 0.38287  | -1.77714 |
| C | -3.88677 | -0.73637 | -1.13240 |
| H | -3.23732 | -1.45394 | -0.60564 |
| C | -5.27791 | -0.94271 | -1.16751 |
| H | -5.70946 | -1.82710 | -0.67132 |
| C | -6.11064 | -0.02788 | -1.83292 |
| H | -7.20097 | -0.18854 | -1.85674 |
| C | -5.55115 | 1.09186  | -2.47660 |
| H | -6.20096 | 1.80756  | -3.00652 |
| C | -4.16204 | 1.29356  | -2.45771 |
| H | -3.73307 | 2.16138  | -2.98686 |
| C | 1.71904  | 3.00970  | -1.26048 |
| C | 3.02417  | 2.66869  | -0.84544 |
| H | 3.17398  | 1.89587  | -0.07475 |
| C | 4.14261  | 3.30679  | -1.40884 |
| H | 5.15361  | 3.03224  | -1.06623 |
| C | 3.97282  | 4.28368  | -2.40400 |
| H | 4.84958  | 4.78147  | -2.84935 |
| C | 2.67682  | 4.62863  | -2.82420 |
| H | 2.53208  | 5.40000  | -3.59826 |
| C | 1.55652  | 4.00386  | -2.25049 |
| H | 0.55275  | 4.32199  | -2.57510 |
| C | 0.08754  | 3.60204  | 0.92800  |
| C | 1.10960  | 3.72388  | 1.89753  |
| H | 1.96567  | 3.02870  | 1.89338  |
| C | 1.07371  | 4.75319  | 2.85170  |
| H | 1.88577  | 4.83814  | 3.59251  |
| C | 0.01775  | 5.68091  | 2.85032  |
| H | -0.00813 | 6.49394  | 3.59402  |
| C | -0.99716 | 5.57209  | 1.88651  |
| H | -1.82486 | 6.29955  | 1.86891  |
| C | -0.96412 | 4.54096  | 0.93127  |
| H | -1.77113 | 4.49179  | 0.18458  |
| C | -1.20022 | 2.44929  | -1.51298 |
| H | -2.06749 | 2.85071  | -0.94873 |
| H | -1.05777 | 3.06177  | -2.42749 |
| C | -0.37016 | -2.29816 | -0.76349 |
| C | 0.66519  | -1.77048 | -1.32984 |
| C | 1.50065  | -0.70912 | -1.52489 |

|    |          |          |          |
|----|----------|----------|----------|
| C  | 2.60108  | -0.37717 | -2.25061 |
| H  | 2.98272  | 0.65355  | -2.16494 |
| C  | 3.35800  | -1.24213 | -3.16379 |
| C  | 3.06233  | -2.61379 | -3.37277 |
| H  | 2.22225  | -3.07698 | -2.82945 |
| C  | 3.82775  | -3.38756 | -4.25355 |
| H  | 3.58225  | -4.45256 | -4.39933 |
| C  | 4.90898  | -2.81476 | -4.95144 |
| H  | 5.50918  | -3.42762 | -5.64364 |
| C  | 5.21804  | -1.45738 | -4.75668 |
| H  | 6.06271  | -0.99944 | -5.29747 |
| C  | 4.45330  | -0.68243 | -3.87316 |
| H  | 4.69933  | 0.38276  | -3.72341 |
| C  | -1.19615 | -3.48142 | -0.76770 |
| C  | -1.08374 | -4.39313 | -1.85869 |
| H  | -0.38236 | -4.16286 | -2.67681 |
| C  | -1.85799 | -5.55765 | -1.90078 |
| H  | -1.75612 | -6.24825 | -2.75421 |
| C  | -2.76434 | -5.84712 | -0.86203 |
| H  | -3.37316 | -6.76523 | -0.89777 |
| C  | -2.88572 | -4.95755 | 0.21909  |
| H  | -3.58715 | -5.17778 | 1.04014  |
| C  | -2.11427 | -3.78643 | 0.26864  |
| H  | -2.20453 | -3.10266 | 1.12395  |
| P  | 1.42295  | -0.47843 | 1.84887  |
| P  | -1.30330 | 0.17030  | 1.95634  |
| P  | 0.27149  | 2.26681  | -0.36039 |
| P  | -1.49072 | 0.61992  | -1.78275 |
| Ru | -0.00231 | -0.08157 | -0.06997 |

\$vibrational spectrum

| # mode | symmetry | wave number | IR intensity | selection |     |
|--------|----------|-------------|--------------|-----------|-----|
| rules  |          | cm** (-1)   | km/mol       | IR        |     |
| #      |          |             |              |           |     |
| RAMAN  |          |             |              |           |     |
| 1      |          | 0.00        | 0.00000      | -         | -   |
| 2      |          | 0.00        | 0.00000      | -         | -   |
| 3      |          | 0.00        | 0.00000      | -         | -   |
| 4      |          | 0.00        | 0.00000      | -         | -   |
| 5      |          | 0.00        | 0.00000      | -         | -   |
| 6      |          | 0.00        | 0.00000      | -         | -   |
| 7      | a        | 17.06       | 0.00852      | YES       | YES |
| 8      | a        | 18.60       | 0.02008      | YES       | YES |
| 9      | a        | 22.76       | 0.02039      | YES       | YES |
| 10     | a        | 23.02       | 0.07399      | YES       | YES |
| 11     | a        | 24.06       | 0.14242      | YES       | YES |
| 12     | a        | 28.08       | 0.00080      | YES       | YES |
| 13     | a        | 31.67       | 0.02961      | YES       | YES |
| 14     | a        | 33.87       | 0.01924      | YES       | YES |
| 15     | a        | 36.19       | 0.00942      | YES       | YES |
| 16     | a        | 37.59       | 0.01870      | YES       | YES |
| 17     | a        | 40.65       | 0.03511      | YES       | YES |
| 18     | a        | 41.78       | 0.07393      | YES       | YES |
| 19     | a        | 43.72       | 0.01304      | YES       | YES |
| 20     | a        | 45.03       | 0.12072      | YES       | YES |
| 21     | a        | 46.61       | 0.02429      | YES       | YES |



|    |   |        |         |     |     |
|----|---|--------|---------|-----|-----|
| 22 | a | 48.59  | 0.07703 | YES | YES |
| 23 | a | 48.68  | 0.03776 | YES | YES |
| 24 | a | 51.97  | 0.11377 | YES | YES |
| 25 | a | 52.33  | 0.00513 | YES | YES |
| 26 | a | 52.43  | 0.14923 | YES | YES |
| 27 | a | 55.79  | 0.03483 | YES | YES |
| 28 | a | 58.92  | 0.08057 | YES | YES |
| 29 | a | 62.73  | 0.16306 | YES | YES |
| 30 | a | 66.82  | 0.07555 | YES | YES |
| 31 | a | 72.36  | 0.11605 | YES | YES |
| 32 | a | 75.24  | 0.08911 | YES | YES |
| 33 | a | 77.61  | 0.51006 | YES | YES |
| 34 | a | 80.80  | 0.39383 | YES | YES |
| 35 | a | 81.60  | 0.14914 | YES | YES |
| 36 | a | 96.17  | 0.37566 | YES | YES |
| 37 | a | 98.00  | 0.08072 | YES | YES |
| 38 | a | 100.06 | 0.01445 | YES | YES |
| 39 | a | 109.97 | 0.67138 | YES | YES |
| 40 | a | 111.01 | 0.06831 | YES | YES |
| 41 | a | 116.22 | 0.50218 | YES | YES |
| 42 | a | 136.23 | 0.81662 | YES | YES |
| 43 | a | 140.09 | 0.70986 | YES | YES |
| 44 | a | 144.75 | 0.02771 | YES | YES |
| 45 | a | 151.89 | 0.13599 | YES | YES |
| 46 | a | 163.64 | 0.13123 | YES | YES |
| 47 | a | 167.21 | 0.21007 | YES | YES |
| 48 | a | 171.87 | 1.00909 | YES | YES |
| 49 | a | 178.67 | 1.56802 | YES | YES |
| 50 | a | 181.78 | 0.03150 | YES | YES |

### S7.14 Complex [4'd]<sup>+</sup>

SCF Energy (au) (RI)BP86/SV(P) -4006.3541499250  
SCF Energy (au) PBE0/def2-TZVPP -4005.700378075  
SCF Energy (au) PBE0/def2-TZVPP -4005.7519932882 (CH<sub>2</sub>Cl<sub>2</sub>  
Correction)  
Zero Point Energy (au) 0.9798067  
Chemical potential (kJ mol<sup>-1</sup>) 2282.93  
Dispersion correction (au) PBE0/def2-TZVPP -0.24852501

xyz coordinates

126

|    |          |          |          |
|----|----------|----------|----------|
| C  | -2.22662 | 0.62415  | -0.05873 |
| C  | -1.32455 | 1.67647  | 0.03194  |
| Ru | -0.00154 | 0.04757  | 0.02351  |
| P  | 0.10590  | -0.28796 | 2.39319  |
| P  | 1.89842  | 1.13650  | 0.80374  |
| P  | 1.18899  | -1.95711 | -0.71732 |
| P  | 0.26951  | 0.14532  | -2.34242 |
| C  | 1.88162  | 0.31759  | 2.49270  |
| C  | 1.49786  | -1.25861 | -2.44181 |
| C  | 0.08457  | -1.96830 | 3.16899  |
| C  | -0.72092 | -2.97256 | 2.59287  |
| C  | -0.78718 | -4.25076 | 3.17495  |
| C  | -0.04449 | -4.53713 | 4.33228  |
| C  | 0.76452  | -3.54118 | 4.91004  |
| C  | 0.82713  | -2.26163 | 4.33497  |
| C  | -0.84312 | 0.70554  | 3.64047  |
| C  | -2.19005 | 1.03613  | 3.37618  |
| C  | -2.95117 | 1.73395  | 4.33015  |
| C  | -2.37769 | 2.10954  | 5.55569  |
| C  | -1.03662 | 1.78467  | 5.82732  |
| C  | -0.27376 | 1.08638  | 4.87758  |
| C  | 1.87542  | 2.95842  | 1.18001  |
| C  | 1.06816  | 3.45039  | 2.23069  |
| C  | 1.05314  | 4.82066  | 2.53837  |
| C  | 1.82789  | 5.72379  | 1.79047  |
| C  | 2.61943  | 5.24609  | 0.73273  |
| C  | 2.64774  | 3.87353  | 0.43017  |
| C  | 3.62735  | 0.93427  | 0.16584  |
| C  | 4.69595  | 0.65477  | 1.04568  |
| C  | 6.01419  | 0.58521  | 0.56551  |
| C  | 6.28577  | 0.80390  | -0.79581 |
| C  | 5.23050  | 1.09271  | -1.67718 |
| C  | 3.90933  | 1.15464  | -1.20076 |
| C  | 0.36439  | -3.58743 | -1.06935 |
| C  | -1.04198 | -3.65680 | -1.07591 |
| C  | -1.69808 | -4.85890 | -1.39329 |
| C  | -0.94954 | -6.00675 | -1.70270 |
| C  | 0.45577  | -5.94646 | -1.69681 |
| C  | 1.11274  | -4.74580 | -1.38100 |
| C  | 2.84222  | -2.53501 | -0.10420 |
| C  | 2.90285  | -3.09062 | 1.19548  |

|   |          |          |          |
|---|----------|----------|----------|
| C | 4.11335  | -3.58914 | 1.70391  |
| C | 5.28142  | -3.54269 | 0.92289  |
| C | 5.22916  | -2.99829 | -0.37047 |
| C | 4.01857  | -2.49812 | -0.88212 |
| C | -1.17901 | -0.30785 | -3.39886 |
| C | -1.35067 | -1.57846 | -3.98741 |
| C | -2.46460 | -1.83460 | -4.80759 |
| C | -3.42031 | -0.83147 | -5.03887 |
| C | -3.26581 | 0.43122  | -4.43736 |
| C | -2.15477 | 0.69260  | -3.62106 |
| C | 0.99083  | 1.53704  | -3.32335 |
| C | 0.93970  | 2.85540  | -2.82579 |
| C | 1.45534  | 3.91834  | -3.58941 |
| C | 2.03281  | 3.66970  | -4.84539 |
| C | 2.08828  | 2.35505  | -5.34532 |
| C | 1.56297  | 1.29281  | -4.59307 |
| H | 2.16815  | 0.96183  | 3.35109  |
| H | 2.54626  | -0.57311 | 2.45652  |
| H | 1.40614  | -1.97896 | -3.28201 |
| H | 2.50676  | -0.79596 | -2.47641 |
| H | -1.28950 | -2.75849 | 1.67392  |
| H | -1.41793 | -5.02736 | 2.71307  |
| H | -0.09293 | -5.54014 | 4.78687  |
| H | 1.34949  | -3.76146 | 5.81816  |
| H | 1.46458  | -1.49309 | 4.80268  |
| H | -2.64780 | 0.75297  | 2.41614  |
| H | -3.99922 | 1.99095  | 4.10642  |
| H | -2.97475 | 2.65876  | 6.30192  |
| H | -0.57921 | 2.07527  | 6.78733  |
| H | 0.77507  | 0.84359  | 5.11541  |
| H | 0.43242  | 2.76971  | 2.81792  |
| H | 0.42441  | 5.18152  | 3.36844  |
| H | 1.81718  | 6.79876  | 2.03409  |
| H | 3.23613  | 5.94395  | 0.14282  |
| H | 3.29706  | 3.52038  | -0.38550 |
| H | 4.51349  | 0.49914  | 2.12071  |
| H | 6.83640  | 0.36543  | 1.26589  |
| H | 7.32220  | 0.75657  | -1.16814 |
| H | 5.43316  | 1.27860  | -2.74469 |
| H | 3.09676  | 1.40582  | -1.90119 |
| H | -1.62917 | -2.75777 | -0.83225 |
| H | -2.79972 | -4.89214 | -1.39134 |
| H | -1.46042 | -6.95307 | -1.94541 |
| H | 1.04910  | -6.84454 | -1.93546 |
| H | 2.21417  | -4.71789 | -1.37249 |
| H | 1.99125  | -3.15756 | 1.81125  |
| H | 4.13904  | -4.02567 | 2.71582  |
| H | 6.23061  | -3.93834 | 1.31984  |
| H | 6.13655  | -2.96569 | -0.99524 |
| H | 4.00810  | -2.08777 | -1.90366 |
| H | -0.62144 | -2.38540 | -3.81706 |
| H | -2.57906 | -2.82800 | -5.27144 |
| H | -4.28726 | -1.03202 | -5.68948 |
| H | -4.01308 | 1.22301  | -4.60922 |
| H | -2.04133 | 1.68987  | -3.16436 |
| H | 0.49028  | 3.04872  | -1.83936 |

|   |          |          |          |
|---|----------|----------|----------|
| H | 1.40336  | 4.94710  | -3.19736 |
| H | 2.43816  | 4.50313  | -5.44225 |
| H | 2.53514  | 2.15728  | -6.33352 |
| H | 1.59151  | 0.26975  | -5.00504 |
| C | -2.77740 | -0.50763 | -0.09187 |
| C | -3.74287 | -1.56450 | -0.11640 |
| C | -1.45124 | 3.03328  | 0.04504  |
| H | -0.52576 | 3.62522  | 0.15082  |
| C | -2.67708 | 3.83933  | -0.04181 |
| C | -5.73369 | -3.57910 | -0.15126 |
| C | -5.15899 | -3.17695 | 1.06859  |
| C | -4.17246 | -2.18218 | 1.09116  |
| C | -4.32922 | -1.98179 | -1.34323 |
| C | -5.31532 | -2.97782 | -1.35285 |
| H | -6.51317 | -4.35834 | -0.16449 |
| H | -5.48899 | -3.63833 | 2.01371  |
| H | -3.73344 | -1.85994 | 2.04842  |
| H | -4.00614 | -1.50677 | -2.28238 |
| H | -5.76939 | -3.28317 | -2.30985 |
| C | -4.96700 | 5.51993  | -0.19799 |
| C | -3.68760 | 6.08218  | -0.04692 |
| C | -2.55979 | 5.25271  | 0.02956  |
| C | -3.97731 | 3.29062  | -0.19551 |
| C | -5.10352 | 4.12038  | -0.27202 |
| H | -5.85612 | 6.16864  | -0.25901 |
| H | -3.56800 | 7.17672  | 0.01153  |
| H | -1.55822 | 5.69969  | 0.15029  |
| H | -4.10513 | 2.19816  | -0.25972 |
| H | -6.10350 | 3.67125  | -0.39218 |

\$vibrational spectrum

| # mode | symmetry | wave number | IR intensity | selection |     |
|--------|----------|-------------|--------------|-----------|-----|
| rules  |          | cm** (-1)   | km/mol       | IR        |     |
| #      |          |             |              |           |     |
| RAMAN  |          |             |              |           |     |
| 1      |          | 0.00        | 0.00000      | -         | -   |
| 2      |          | 0.00        | 0.00000      | -         | -   |
| 3      |          | 0.00        | 0.00000      | -         | -   |
| 4      |          | 0.00        | 0.00000      | -         | -   |
| 5      |          | 0.00        | 0.00000      | -         | -   |
| 6      |          | 0.00        | 0.00000      | -         | -   |
| 7      | a        | 7.84        | 0.02175      | YES       | YES |
| 8      | a        | 15.58       | 0.00686      | YES       | YES |
| 9      | a        | 19.17       | 0.03198      | YES       | YES |
| 10     | a        | 23.57       | 0.06963      | YES       | YES |
| 11     | a        | 25.67       | 0.13203      | YES       | YES |
| 12     | a        | 26.80       | 0.05415      | YES       | YES |
| 13     | a        | 29.63       | 0.06839      | YES       | YES |
| 14     | a        | 30.96       | 0.06137      | YES       | YES |
| 15     | a        | 32.73       | 0.15180      | YES       | YES |
| 16     | a        | 35.74       | 0.03516      | YES       | YES |
| 17     | a        | 36.47       | 0.07104      | YES       | YES |
| 18     | a        | 38.43       | 0.05345      | YES       | YES |
| 19     | a        | 39.03       | 0.00449      | YES       | YES |
| 20     | a        | 41.46       | 0.01861      | YES       | YES |
| 21     | a        | 43.34       | 0.09612      | YES       | YES |

|    |   |        |         |     |     |
|----|---|--------|---------|-----|-----|
| 22 | a | 43.76  | 0.12532 | YES | YES |
| 23 | a | 46.18  | 0.02348 | YES | YES |
| 24 | a | 50.12  | 0.03978 | YES | YES |
| 25 | a | 50.78  | 0.12244 | YES | YES |
| 26 | a | 51.84  | 0.04532 | YES | YES |
| 27 | a | 54.60  | 0.00577 | YES | YES |
| 28 | a | 57.07  | 0.17073 | YES | YES |
| 29 | a | 59.04  | 0.03440 | YES | YES |
| 30 | a | 63.32  | 0.04625 | YES | YES |
| 31 | a | 64.89  | 0.14128 | YES | YES |
| 32 | a | 66.33  | 0.24388 | YES | YES |
| 33 | a | 70.94  | 0.05829 | YES | YES |
| 34 | a | 76.75  | 0.19969 | YES | YES |
| 35 | a | 83.65  | 0.18650 | YES | YES |
| 36 | a | 91.51  | 1.46390 | YES | YES |
| 37 | a | 96.07  | 0.85310 | YES | YES |
| 38 | a | 97.54  | 1.64998 | YES | YES |
| 39 | a | 103.16 | 0.41863 | YES | YES |
| 40 | a | 109.68 | 1.10453 | YES | YES |
| 41 | a | 110.03 | 0.45663 | YES | YES |
| 42 | a | 118.72 | 1.08971 | YES | YES |
| 43 | a | 135.15 | 2.50482 | YES | YES |
| 44 | a | 141.31 | 0.42384 | YES | YES |
| 45 | a | 152.53 | 0.03285 | YES | YES |
| 46 | a | 162.89 | 0.17690 | YES | YES |
| 47 | a | 167.81 | 0.24520 | YES | YES |
| 48 | a | 171.23 | 0.32242 | YES | YES |
| 49 | a | 177.82 | 1.83780 | YES | YES |
| 50 | a | 182.89 | 0.92937 | YES | YES |

### S7.15 Complex TS<sub>[Pd]<sup>+</sup>[4' d]</sub>

SCF Energy (au) (RI)BP86/SV(P) -4006.3087965910  
SCF Energy (au) PBE0/def2-TZVPP -4005.653424065  
SCF Energy (au) PBE0/def2-TZVPP -4005.7055594810 (CH<sub>2</sub>Cl<sub>2</sub>  
Correction)  
Zero Point Energy (au) 0.9768819  
Chemical potential (kJ mol<sup>-1</sup>) 2270.88  
Dispersion correction (au) PBE0/def2-TZVPP -0.24518860

xyz coordinates

126

|    |          |          |          |
|----|----------|----------|----------|
| C  | -1.51667 | 0.45516  | -0.90214 |
| C  | -0.62031 | 1.69964  | 0.60983  |
| Ru | 0.16877  | 0.04222  | 0.18243  |
| P  | -1.07817 | -1.26936 | 1.75181  |
| P  | 1.61189  | -0.50222 | 2.05423  |
| P  | 1.13585  | -1.77971 | -1.25160 |
| P  | 1.71914  | 0.99265  | -1.36442 |
| C  | 0.42443  | -1.78441 | 2.75261  |
| C  | 2.49319  | -0.63177 | -1.87715 |
| C  | -1.94230 | -2.82053 | 1.24968  |
| C  | -2.42121 | -2.94770 | -0.07124 |
| C  | -3.10904 | -4.11164 | -0.45913 |
| C  | -3.31551 | -5.15120 | 0.46295  |
| C  | -2.83984 | -5.02663 | 1.78178  |
| C  | -2.16051 | -3.86371 | 2.17793  |
| C  | -2.28640 | -0.49402 | 2.91092  |
| C  | -3.24962 | 0.38113  | 2.35982  |
| C  | -4.23667 | 0.95095  | 3.18109  |
| C  | -4.27032 | 0.65683  | 4.55498  |
| C  | -3.31316 | -0.21114 | 5.10876  |
| C  | -2.32475 | -0.78579 | 4.29224  |
| C  | 1.78577  | 0.75588  | 3.41255  |
| C  | 0.63705  | 1.45322  | 3.85111  |
| C  | 0.72711  | 2.38942  | 4.89423  |
| C  | 1.96740  | 2.65908  | 5.49930  |
| C  | 3.11422  | 1.97736  | 5.06198  |
| C  | 3.02681  | 1.02671  | 4.02923  |
| C  | 3.28018  | -1.29772 | 2.03677  |
| C  | 3.55346  | -2.48381 | 2.75095  |
| C  | 4.85036  | -3.02505 | 2.76022  |
| C  | 5.89026  | -2.38558 | 2.06476  |
| C  | 5.62923  | -1.19884 | 1.35809  |
| C  | 4.33225  | -0.65852 | 1.34090  |
| C  | 0.30912  | -2.38410 | -2.79910 |
| C  | -0.60757 | -1.54159 | -3.46597 |
| C  | -1.21130 | -1.95991 | -4.66396 |
| C  | -0.91452 | -3.22186 | -5.20551 |
| C  | -0.00691 | -4.06602 | -4.54438 |
| C  | 0.60308  | -3.65341 | -3.34785 |
| C  | 1.99527  | -3.30328 | -0.65062 |
| C  | 1.22599  | -4.26864 | 0.04029  |

|   |          |          |          |
|---|----------|----------|----------|
| C | 1.81100  | -5.47101 | 0.47077  |
| C | 3.17108  | -5.72435 | 0.22073  |
| C | 3.94110  | -4.77147 | -0.46664 |
| C | 3.35792  | -3.56890 | -0.90272 |
| C | 1.11335  | 1.84432  | -2.88445 |
| C | 1.34145  | 1.37554  | -4.19483 |
| C | 0.88364  | 2.11460  | -5.30051 |
| C | 0.19415  | 3.32284  | -5.10788 |
| C | -0.04440 | 3.79058  | -3.80258 |
| C | 0.40849  | 3.05568  | -2.69638 |
| C | 3.10453  | 2.09423  | -0.83793 |
| C | 3.00521  | 2.81698  | 0.36900  |
| C | 4.04510  | 3.67797  | 0.76343  |
| C | 5.19042  | 3.81315  | -0.03845 |
| C | 5.29430  | 3.09355  | -1.24374 |
| C | 4.25325  | 2.24342  | -1.64830 |
| H | 0.33566  | -1.79999 | 3.85931  |
| H | 0.73445  | -2.79020 | 2.39396  |
| H | 2.78073  | -0.76298 | -2.94133 |
| H | 3.39470  | -0.76692 | -1.24168 |
| H | -2.25673 | -2.13167 | -0.79386 |
| H | -3.48186 | -4.20386 | -1.49200 |
| H | -3.85266 | -6.06362 | 0.15608  |
| H | -3.00548 | -5.83819 | 2.50931  |
| H | -1.80624 | -3.77188 | 3.21867  |
| H | -3.22377 | 0.61947  | 1.28399  |
| H | -4.98003 | 1.63531  | 2.74132  |
| H | -5.04442 | 1.10646  | 5.19821  |
| H | -3.33439 | -0.44579 | 6.18563  |
| H | -1.58574 | -1.46371 | 4.74957  |
| H | -0.34290 | 1.26198  | 3.38537  |
| H | -0.18191 | 2.91193  | 5.23449  |
| H | 2.03825  | 3.39877  | 6.31341  |
| H | 4.09117  | 2.17761  | 5.53182  |
| H | 3.93596  | 0.49370  | 3.71254  |
| H | 2.75956  | -2.99496 | 3.31806  |
| H | 5.04845  | -3.95157 | 3.32330  |
| H | 6.90783  | -2.80913 | 2.07940  |
| H | 6.44122  | -0.68337 | 0.81947  |
| H | 4.14737  | 0.28723  | 0.80483  |
| H | -0.86524 | -0.55927 | -3.04070 |
| H | -1.92749 | -1.29169 | -5.17030 |
| H | -1.39397 | -3.55026 | -6.14238 |
| H | 0.23101  | -5.05929 | -4.96001 |
| H | 1.31001  | -4.33103 | -2.84300 |
| H | 0.15237  | -4.09380 | 0.22124  |
| H | 1.19508  | -6.21752 | 0.99853  |
| H | 3.62949  | -6.66930 | 0.55543  |
| H | 5.00577  | -4.96576 | -0.67517 |
| H | 3.98008  | -2.84693 | -1.45474 |
| H | 1.87557  | 0.42951  | -4.37527 |
| H | 1.07315  | 1.73999  | -6.32005 |
| H | -0.15694 | 3.90327  | -5.97683 |
| H | -0.58712 | 4.73592  | -3.64098 |
| H | 0.21498  | 3.43221  | -1.67852 |
| H | 2.10982  | 2.70366  | 1.00093  |

|   |          |          |          |
|---|----------|----------|----------|
| H | 3.95771  | 4.24357  | 1.70518  |
| H | 6.00635  | 4.48592  | 0.27266  |
| H | 6.18924  | 3.20295  | -1.87812 |
| H | 4.33551  | 1.70164  | -2.60588 |
| C | -2.58223 | 0.65019  | -1.52215 |
| C | -3.76652 | 0.82100  | -2.30285 |
| C | -1.05975 | 2.89844  | 0.99771  |
| H | -0.45609 | 3.18384  | 1.89234  |
| C | -2.08360 | 3.88795  | 0.62511  |
| C | -6.10565 | 1.14306  | -3.87593 |
| C | -6.17492 | 0.49017  | -2.63139 |
| C | -5.02244 | 0.32907  | -1.85107 |
| C | -3.71290 | 1.48009  | -3.56367 |
| C | -4.87118 | 1.63615  | -4.33730 |
| H | -7.01471 | 1.26806  | -4.48670 |
| H | -7.13997 | 0.10232  | -2.26568 |
| H | -5.07817 | -0.18448 | -0.87811 |
| H | -2.74583 | 1.86734  | -3.92327 |
| H | -4.81187 | 2.14866  | -5.31182 |
| C | -4.04464 | 5.85646  | 0.03869  |
| C | -3.35878 | 5.88622  | 1.26563  |
| C | -2.38834 | 4.91651  | 1.55397  |
| C | -2.77075 | 3.87932  | -0.61279 |
| C | -3.74178 | 4.85097  | -0.89691 |
| H | -4.80879 | 6.61735  | -0.18946 |
| H | -3.58126 | 6.67246  | 2.00586  |
| H | -1.85703 | 4.94687  | 2.52049  |
| H | -2.53585 | 3.10407  | -1.35545 |
| H | -4.26817 | 4.82022  | -1.86503 |

\$vibrational spectrum

| # mode | symmetry | wave number | IR intensity | selection |
|--------|----------|-------------|--------------|-----------|
| rules  |          | cm** (-1)   | km/mol       | IR        |
| #      |          |             |              |           |
| RAMAN  |          |             |              |           |
| 1      | a        | -174.34     | 0.00000      | YES YES   |
| 2      |          | 0.00        | 0.00000      | - -       |
| 3      |          | 0.00        | 0.00000      | - -       |
| 4      |          | 0.00        | 0.00000      | - -       |
| 5      |          | 0.00        | 0.00000      | - -       |
| 6      |          | 0.00        | 0.00000      | - -       |
| 7      |          | 0.00        | 0.00000      | - -       |
| 8      | a        | 4.92        | 0.03875      | YES YES   |
| 9      | a        | 11.11       | 0.13720      | YES YES   |
| 10     | a        | 16.18       | 0.20371      | YES YES   |
| 11     | a        | 17.24       | 0.01095      | YES YES   |
| 12     | a        | 18.60       | 0.03796      | YES YES   |
| 13     | a        | 24.60       | 0.02976      | YES YES   |
| 14     | a        | 24.93       | 0.14766      | YES YES   |
| 15     | a        | 29.81       | 0.01430      | YES YES   |
| 16     | a        | 31.61       | 0.06495      | YES YES   |
| 17     | a        | 34.62       | 0.06548      | YES YES   |
| 18     | a        | 35.55       | 0.00181      | YES YES   |
| 19     | a        | 37.81       | 0.05592      | YES YES   |
| 20     | a        | 38.88       | 0.10671      | YES YES   |
| 21     | a        | 40.20       | 0.15565      | YES YES   |



|    |   |        |         |     |     |
|----|---|--------|---------|-----|-----|
| 22 | a | 41.14  | 0.00498 | YES | YES |
| 23 | a | 44.24  | 0.02726 | YES | YES |
| 24 | a | 45.27  | 0.04766 | YES | YES |
| 25 | a | 46.40  | 0.12569 | YES | YES |
| 26 | a | 48.25  | 0.04825 | YES | YES |
| 27 | a | 51.93  | 0.03263 | YES | YES |
| 28 | a | 52.69  | 0.03762 | YES | YES |
| 29 | a | 56.59  | 0.33365 | YES | YES |
| 30 | a | 60.35  | 0.19022 | YES | YES |
| 31 | a | 61.54  | 0.16100 | YES | YES |
| 32 | a | 64.21  | 0.23639 | YES | YES |
| 33 | a | 68.01  | 0.05564 | YES | YES |
| 34 | a | 72.11  | 0.09385 | YES | YES |
| 35 | a | 79.83  | 0.31768 | YES | YES |
| 36 | a | 87.42  | 2.19924 | YES | YES |
| 37 | a | 93.59  | 1.30484 | YES | YES |
| 38 | a | 97.52  | 1.80758 | YES | YES |
| 39 | a | 101.50 | 1.36543 | YES | YES |
| 40 | a | 103.70 | 2.32070 | YES | YES |
| 41 | a | 109.33 | 0.89557 | YES | YES |
| 42 | a | 118.22 | 1.44617 | YES | YES |
| 43 | a | 128.16 | 0.62056 | YES | YES |
| 44 | a | 143.48 | 3.47245 | YES | YES |
| 45 | a | 151.25 | 0.18860 | YES | YES |
| 46 | a | 154.48 | 1.28932 | YES | YES |
| 47 | a | 162.63 | 1.21232 | YES | YES |
| 48 | a | 167.01 | 0.93027 | YES | YES |
| 49 | a | 171.80 | 1.22120 | YES | YES |
| 50 | a | 178.83 | 6.33442 | YES | YES |

## S7.16Complex [Dd-Z]<sup>+</sup>

SCF Energy (au) (RI)BP86/SV(P) -4006.3123824210  
SCF Energy (au) PBE0/def2-TZVPP -4005.655152406  
SCF Energy (au) PBE0/def2-TZVPP -4005.7100569776 (CH<sub>2</sub>Cl<sub>2</sub>  
Correction)  
Zero Point Energy (au) 0.9773421  
Chemical potential (kJ mol<sup>-1</sup>) 2271.15  
Dispersion correction (au) PBE0/def2-TZVPP -0.24337569

xyz coordinates

126

|    |          |          |          |
|----|----------|----------|----------|
| Ru | -0.07904 | 0.09859  | 0.09650  |
| C  | -1.64180 | 0.22175  | -1.19608 |
| C  | -0.63017 | 1.73120  | 0.76958  |
| P  | -1.36392 | -1.23920 | 1.61115  |
| P  | 1.33032  | -0.47491 | 2.02836  |
| P  | 0.80832  | -1.78988 | -1.43011 |
| P  | 1.44766  | 1.02016  | -1.52865 |
| C  | 0.08069  | -1.70490 | 2.71349  |
| C  | 2.08243  | -0.62145 | -2.16594 |
| C  | -2.14266 | -2.83437 | 1.10390  |
| C  | -2.63417 | -2.99571 | -0.20826 |
| C  | -3.27545 | -4.19368 | -0.57259 |
| C  | -3.42436 | -5.23140 | 0.36218  |
| C  | -2.93476 | -5.07271 | 1.67204  |
| C  | -2.30032 | -3.87756 | 2.04565  |
| C  | -2.68154 | -0.47293 | 2.64716  |
| C  | -3.64219 | 0.31783  | 1.97750  |
| C  | -4.72401 | 0.86221  | 2.68838  |
| C  | -4.85180 | 0.63087  | 4.06911  |
| C  | -3.89765 | -0.15383 | 4.73908  |
| C  | -2.81737 | -0.70925 | 4.03210  |
| C  | 1.53758  | 0.73480  | 3.41900  |
| C  | 0.39199  | 1.24033  | 4.07479  |
| C  | 0.52646  | 2.13173  | 5.15089  |
| C  | 1.80182  | 2.54304  | 5.57541  |
| C  | 2.94307  | 2.06042  | 4.91431  |
| C  | 2.81578  | 1.15825  | 3.84303  |
| C  | 2.96205  | -1.33386 | 2.00120  |
| C  | 3.23697  | -2.44578 | 2.82625  |
| C  | 4.51592  | -3.02669 | 2.82811  |
| C  | 5.53551  | -2.49705 | 2.01845  |
| C  | 5.27218  | -1.38354 | 1.20298  |
| C  | 3.99047  | -0.80739 | 1.18881  |
| C  | -0.14085 | -2.38904 | -2.90069 |
| C  | -0.62457 | -1.45546 | -3.84551 |
| C  | -1.34085 | -1.89508 | -4.97052 |
| C  | -1.59191 | -3.26430 | -5.16203 |
| C  | -1.11873 | -4.19584 | -4.22325 |
| C  | -0.39758 | -3.76399 | -3.09700 |
| C  | 1.74869  | -3.29546 | -0.91383 |
| C  | 1.13829  | -4.19447 | -0.01025 |

|   |          |          |          |
|---|----------|----------|----------|
| C | 1.78460  | -5.38784 | 0.35451  |
| C | 3.05184  | -5.69233 | -0.17008 |
| C | 3.66530  | -4.80393 | -1.06977 |
| C | 3.01686  | -3.61547 | -1.44499 |
| C | 0.81489  | 1.97574  | -2.97564 |
| C | 1.43399  | 1.90198  | -4.24316 |
| C | 0.99197  | 2.72220  | -5.29361 |
| C | -0.05990 | 3.63166  | -5.08311 |
| C | -0.67378 | 3.71277  | -3.82180 |
| C | -0.24532 | 2.88394  | -2.77060 |
| C | 2.96155  | 1.99047  | -1.09418 |
| C | 2.84532  | 3.04456  | -0.16450 |
| C | 3.95480  | 3.85205  | 0.13596  |
| C | 5.19238  | 3.61132  | -0.48460 |
| C | 5.31531  | 2.56454  | -1.41522 |
| C | 4.20577  | 1.75935  | -1.72372 |
| H | -0.07257 | -1.64512 | 3.81151  |
| H | 0.40130  | -2.73485 | 2.44835  |
| H | 2.20236  | -0.71326 | -3.26603 |
| H | 3.05798  | -0.82248 | -1.67491 |
| H | -2.51985 | -2.17948 | -0.94133 |
| H | -3.65809 | -4.31146 | -1.59915 |
| H | -3.92720 | -6.16881 | 0.07297  |
| H | -3.05489 | -5.88212 | 2.41076  |
| H | -1.93689 | -3.76080 | 3.08086  |
| H | -3.54315 | 0.49664  | 0.89267  |
| H | -5.47187 | 1.47429  | 2.15834  |
| H | -5.69962 | 1.06223  | 4.62588  |
| H | -3.99526 | -0.34178 | 5.82083  |
| H | -2.08725 | -1.33045 | 4.57649  |
| H | -0.62023 | 0.95141  | 3.74868  |
| H | -0.37652 | 2.51268  | 5.65446  |
| H | 1.90489  | 3.24264  | 6.42081  |
| H | 3.94783  | 2.37703  | 5.23911  |
| H | 3.72309  | 0.77534  | 3.35059  |
| H | 2.45872  | -2.86270 | 3.48589  |
| H | 4.71833  | -3.89591 | 3.47491  |
| H | 6.53969  | -2.95142 | 2.02762  |
| H | 6.06917  | -0.95614 | 0.57283  |
| H | 3.79906  | 0.07542  | 0.55598  |
| H | -0.45252 | -0.37665 | -3.71054 |
| H | -1.71163 | -1.15534 | -5.69794 |
| H | -2.15571 | -3.60529 | -6.04569 |
| H | -1.30255 | -5.27304 | -4.36872 |
| H | -0.02457 | -4.51065 | -2.37941 |
| H | 0.13422  | -3.97751 | 0.39071  |
| H | 1.29046  | -6.08462 | 1.05123  |
| H | 3.56040  | -6.62720 | 0.11682  |
| H | 4.65492  | -5.04104 | -1.49339 |
| H | 3.50722  | -2.94794 | -2.17178 |
| H | 2.27435  | 1.21114  | -4.42356 |
| H | 1.47887  | 2.65571  | -6.28027 |
| H | -0.39968 | 4.28088  | -5.90666 |
| H | -1.49843 | 4.42386  | -3.65196 |
| H | -0.73799 | 2.93880  | -1.78756 |
| H | 1.87873  | 3.24799  | 0.32317  |

|   |          |          |          |
|---|----------|----------|----------|
| H | 3.84554  | 4.67645  | 0.85912  |
| H | 6.06319  | 4.24424  | -0.24799 |
| H | 6.28064  | 2.37720  | -1.91366 |
| H | 4.32027  | 0.95543  | -2.46985 |
| C | -2.66713 | 0.34560  | -1.88849 |
| C | -3.83425 | 0.46399  | -2.71206 |
| C | -1.22460 | 2.89136  | 1.04833  |
| H | -2.28013 | 2.85690  | 0.69084  |
| C | -0.78787 | 4.16176  | 1.64725  |
| C | -6.14966 | 0.70123  | -4.34316 |
| C | -6.19421 | -0.05078 | -3.15532 |
| C | -5.05412 | -0.16957 | -2.34820 |
| C | -3.80638 | 1.21961  | -3.91611 |
| C | -4.95099 | 1.33479  | -4.71774 |
| H | -7.04803 | 0.79442  | -4.97511 |
| H | -7.12997 | -0.55040 | -2.85387 |
| H | -5.09487 | -0.75984 | -1.41842 |
| H | -2.86965 | 1.72077  | -4.20845 |
| H | -4.90861 | 1.92788  | -5.64660 |
| C | -0.02449 | 6.67442  | 2.73343  |
| C | -1.25927 | 6.53237  | 2.07673  |
| C | -1.63750 | 5.29241  | 1.54216  |
| C | 0.44815  | 4.31534  | 2.32564  |
| C | 0.82265  | 5.55830  | 2.85680  |
| H | 0.27277  | 7.64835  | 3.15491  |
| H | -1.93711 | 7.39643  | 1.97989  |
| H | -2.60764 | 5.19285  | 1.02678  |
| H | 1.10697  | 3.44386  | 2.46365  |
| H | 1.78509  | 5.65223  | 3.38670  |

\$vibrational spectrum

| #     | mode | symmetry | wave number | IR intensity | selection |
|-------|------|----------|-------------|--------------|-----------|
| rules |      |          |             |              |           |
| #     |      |          | cm** (-1)   | km/mol       | IR        |
| RAMAN |      |          |             |              |           |
| 1     |      |          | 0.00        | 0.00000      | -         |
| 2     |      |          | 0.00        | 0.00000      | -         |
| 3     |      |          | 0.00        | 0.00000      | -         |
| 4     |      |          | 0.00        | 0.00000      | -         |
| 5     |      |          | 0.00        | 0.00000      | -         |
| 6     |      |          | 0.00        | 0.00000      | -         |
| 7     |      | a        | 6.71        | 0.02265      | YES YES   |
| 8     |      | a        | 12.49       | 0.11201      | YES YES   |
| 9     |      | a        | 16.26       | 0.01273      | YES YES   |
| 10    |      | a        | 17.07       | 0.01255      | YES YES   |
| 11    |      | a        | 21.35       | 0.01561      | YES YES   |
| 12    |      | a        | 22.09       | 0.00877      | YES YES   |
| 13    |      | a        | 26.92       | 0.01662      | YES YES   |
| 14    |      | a        | 27.60       | 0.00702      | YES YES   |
| 15    |      | a        | 30.58       | 0.00446      | YES YES   |
| 16    |      | a        | 34.17       | 0.04273      | YES YES   |
| 17    |      | a        | 34.46       | 0.00275      | YES YES   |
| 18    |      | a        | 34.79       | 0.07314      | YES YES   |
| 19    |      | a        | 38.72       | 0.08688      | YES YES   |
| 20    |      | a        | 40.83       | 0.08003      | YES YES   |
| 21    |      | a        | 43.24       | 0.14549      | YES YES   |

|    |   |        |         |     |     |
|----|---|--------|---------|-----|-----|
| 22 | a | 45.09  | 0.06783 | YES | YES |
| 23 | a | 45.72  | 0.05299 | YES | YES |
| 24 | a | 50.40  | 0.02457 | YES | YES |
| 25 | a | 52.00  | 0.05474 | YES | YES |
| 26 | a | 53.42  | 0.02200 | YES | YES |
| 27 | a | 56.16  | 0.04374 | YES | YES |
| 28 | a | 57.28  | 0.06024 | YES | YES |
| 29 | a | 59.34  | 0.07019 | YES | YES |
| 30 | a | 63.26  | 0.05059 | YES | YES |
| 31 | a | 64.55  | 0.05306 | YES | YES |
| 32 | a | 69.13  | 0.28920 | YES | YES |
| 33 | a | 72.05  | 0.23074 | YES | YES |
| 34 | a | 76.09  | 0.68233 | YES | YES |
| 35 | a | 81.71  | 0.71968 | YES | YES |
| 36 | a | 86.40  | 0.61253 | YES | YES |
| 37 | a | 92.97  | 0.72567 | YES | YES |
| 38 | a | 97.57  | 0.88577 | YES | YES |
| 39 | a | 107.17 | 0.76038 | YES | YES |
| 40 | a | 107.31 | 0.85439 | YES | YES |
| 41 | a | 112.65 | 1.24269 | YES | YES |
| 42 | a | 116.42 | 0.18207 | YES | YES |
| 43 | a | 125.43 | 2.24694 | YES | YES |
| 44 | a | 142.81 | 1.26652 | YES | YES |
| 45 | a | 147.61 | 0.41290 | YES | YES |
| 46 | a | 157.50 | 0.30338 | YES | YES |
| 47 | a | 161.34 | 0.43544 | YES | YES |
| 48 | a | 163.99 | 0.25973 | YES | YES |
| 49 | a | 169.91 | 0.13754 | YES | YES |
| 50 | a | 171.25 | 2.25035 | YES | YES |

## S7.17 Complex [4d-Z]<sup>+</sup>

SCF Energy (au) (RI)BP86/SV(P) -4006.3352712970  
SCF Energy (au) PBE0/def2-TZVPP -4005.680342212  
SCF Energy (au) PBE0/def2-TZVPP -4005.7314016681 (CH<sub>2</sub>Cl<sub>2</sub>  
Correction)  
Zero Point Energy (au) 0.9797648  
Chemical potential (kJ mol<sup>-1</sup>) 2284.25  
Dispersion correction (au) PBE0/def2-TZVPP -0.24819490

xyz coordinates

126

|   |          |          |         |
|---|----------|----------|---------|
| C | 1.72515  | -2.22184 | 2.32175 |
| C | 0.85179  | -2.92235 | 3.18124 |
| H | -0.05395 | -2.44220 | 3.58340 |
| C | 1.12719  | -4.25476 | 3.53769 |
| H | 0.44649  | -4.78304 | 4.22539 |
| C | 2.26403  | -4.90497 | 3.02879 |
| H | 2.48101  | -5.94723 | 3.31467 |
| C | 3.12762  | -4.21757 | 2.15752 |
| H | 4.02242  | -4.71965 | 1.75468 |
| C | 2.86336  | -2.88478 | 1.80613 |
| H | 3.55762  | -2.35277 | 1.13549 |
| C | 3.05874  | 0.30744  | 2.23814 |
| C | 3.91665  | 0.77054  | 1.22102 |
| H | 3.61638  | 0.68760  | 0.16462 |
| C | 5.16377  | 1.33179  | 1.55014 |
| H | 5.83122  | 1.67789  | 0.74428 |
| C | 5.55378  | 1.44362  | 2.89465 |
| H | 6.53023  | 1.88553  | 3.15261 |
| C | 4.69928  | 0.98383  | 3.91472 |
| H | 5.00540  | 1.06332  | 4.97085 |
| C | 3.46001  | 0.41023  | 3.59052 |
| H | 2.80922  | 0.03248  | 4.39723 |
| C | -2.36139 | 1.62666  | 2.34993 |
| C | -3.64387 | 1.70756  | 1.75779 |
| H | -3.96700 | 0.94433  | 1.03072 |
| C | -4.53079 | 2.73644  | 2.11197 |
| H | -5.52951 | 2.77835  | 1.64690 |
| C | -4.15448 | 3.69659  | 3.06805 |
| H | -4.85422 | 4.49884  | 3.35401 |
| C | -2.88548 | 3.62029  | 3.66392 |
| H | -2.58289 | 4.36253  | 4.42043 |
| C | -1.99160 | 2.59526  | 3.30568 |
| H | -1.00358 | 2.56466  | 3.79015 |
| C | -2.32750 | -1.18445 | 2.54570 |
| C | -2.71591 | -2.26796 | 1.73841 |
| H | -2.38130 | -2.30697 | 0.69092 |
| C | -3.52418 | -3.29323 | 2.26376 |
| H | -3.82521 | -4.13416 | 1.61883 |
| C | -3.93975 | -3.24518 | 3.60356 |
| H | -4.57248 | -4.04805 | 4.01641 |
| C | -3.55216 | -2.16502 | 4.41932 |

|   |          |          |          |
|---|----------|----------|----------|
| H | -3.88163 | -2.11858 | 5.47039  |
| C | -2.75781 | -1.13554 | 3.89275  |
| H | -2.48638 | -0.27991 | 4.53418  |
| C | 0.19321  | 0.23793  | 3.01243  |
| H | 0.07204  | -0.26839 | 3.99390  |
| H | 0.48842  | 1.29396  | 3.18680  |
| C | -1.29604 | 0.27734  | -3.61298 |
| C | -0.20197 | -0.45765 | -4.11526 |
| H | 0.51943  | -0.91133 | -3.41808 |
| C | -0.01850 | -0.59164 | -5.50363 |
| H | 0.83981  | -1.16874 | -5.88449 |
| C | -0.91898 | 0.00946  | -6.39768 |
| H | -0.77323 | -0.09595 | -7.48536 |
| C | -2.01173 | 0.74533  | -5.90217 |
| H | -2.72432 | 1.21633  | -6.59913 |
| C | -2.20540 | 0.87322  | -4.51827 |
| H | -3.07953 | 1.43300  | -4.14597 |
| C | -3.35314 | 0.04284  | -1.66414 |
| C | -3.73118 | -1.31753 | -1.64774 |
| H | -2.95689 | -2.10203 | -1.66176 |
| C | -5.08700 | -1.68105 | -1.62747 |
| H | -5.36600 | -2.74721 | -1.61418 |
| C | -6.08393 | -0.68967 | -1.62457 |
| H | -7.14848 | -0.97471 | -1.60936 |
| C | -5.71773 | 0.66655  | -1.64569 |
| H | -6.49400 | 1.44938  | -1.65292 |
| C | -4.36001 | 1.03325  | -1.66535 |
| H | -4.09650 | 2.10334  | -1.68637 |
| C | 1.39783  | 2.99067  | -1.81104 |
| C | 2.45138  | 3.83325  | -1.38941 |
| H | 2.64983  | 3.98758  | -0.31784 |
| C | 3.24252  | 4.51211  | -2.33169 |
| H | 4.05023  | 5.17624  | -1.98246 |
| C | 2.99772  | 4.35900  | -3.70657 |
| H | 3.61276  | 4.90002  | -4.44409 |
| C | 1.96288  | 3.51068  | -4.13470 |
| H | 1.76338  | 3.37617  | -5.21013 |
| C | 1.17095  | 2.82906  | -3.19654 |
| H | 0.37401  | 2.16431  | -3.56279 |
| C | 0.28638  | 3.46908  | 0.74844  |
| C | 1.25051  | 3.42918  | 1.77941  |
| H | 1.96454  | 2.59179  | 1.83906  |
| C | 1.33615  | 4.47327  | 2.71769  |
| H | 2.10209  | 4.43188  | 3.50943  |
| C | 0.45775  | 5.56706  | 2.63803  |
| H | 0.52650  | 6.38769  | 3.37082  |
| C | -0.50228 | 5.61529  | 1.61243  |
| H | -1.19056 | 6.47299  | 1.53814  |
| C | -0.58539 | 4.57705  | 0.67026  |
| H | -1.33268 | 4.64784  | -0.13616 |
| C | -1.40493 | 2.27532  | -1.39222 |
| H | -2.14813 | 2.51694  | -0.60079 |
| H | -1.50531 | 2.99122  | -2.23611 |
| C | -0.28808 | -3.20366 | -0.79639 |
| C | 0.49388  | -2.24070 | -0.96365 |
| C | 1.46650  | -1.25024 | -1.24268 |

|    |          |          |          |
|----|----------|----------|----------|
| C  | 2.66339  | -1.61690 | -1.81440 |
| H  | 2.77261  | -2.70534 | -1.99681 |
| C  | 3.84622  | -0.86382 | -2.23084 |
| C  | 5.00993  | -1.59825 | -2.58976 |
| H  | 4.98146  | -2.70063 | -2.54560 |
| C  | 6.18607  | -0.95215 | -2.99240 |
| H  | 7.07395  | -1.54786 | -3.26157 |
| C  | 6.23096  | 0.45208  | -3.05813 |
| H  | 7.15212  | 0.96449  | -3.38094 |
| C  | 5.08453  | 1.19599  | -2.72210 |
| H  | 5.10001  | 2.29588  | -2.78839 |
| C  | 3.90813  | 0.54915  | -2.31551 |
| H  | 3.01035  | 1.13865  | -2.08390 |
| C  | -1.09522 | -4.37155 | -0.70283 |
| C  | -1.92718 | -4.75749 | -1.79389 |
| H  | -1.95711 | -4.12543 | -2.69562 |
| C  | -2.67018 | -5.94313 | -1.73503 |
| H  | -3.29966 | -6.23753 | -2.59059 |
| C  | -2.60432 | -6.76281 | -0.59226 |
| H  | -3.18717 | -7.69758 | -0.55094 |
| C  | -1.78562 | -6.39477 | 0.49212  |
| H  | -1.72635 | -7.04259 | 1.38189  |
| C  | -1.03465 | -5.21361 | 0.44343  |
| H  | -0.38265 | -4.92609 | 1.28269  |
| P  | 1.43855  | -0.46861 | 1.81097  |
| P  | -1.28672 | 0.19189  | 1.85556  |
| P  | 0.27715  | 2.16141  | -0.56766 |
| P  | -1.54999 | 0.44554  | -1.78114 |
| Ru | 0.09428  | -0.13167 | -0.13467 |

\$vibrational spectrum

| # mode | symmetry | wave number | IR intensity | selection |     |
|--------|----------|-------------|--------------|-----------|-----|
| rules  |          | cm** (-1)   | km/mol       | IR        |     |
| #      |          |             |              |           |     |
| RAMAN  |          |             |              |           |     |
| 1      |          | 0.00        | 0.00000      | -         | -   |
| 2      |          | 0.00        | 0.00000      | -         | -   |
| 3      |          | 0.00        | 0.00000      | -         | -   |
| 4      |          | 0.00        | 0.00000      | -         | -   |
| 5      |          | 0.00        | 0.00000      | -         | -   |
| 6      |          | 0.00        | 0.00000      | -         | -   |
| 7      | a        | 7.37        | 0.06809      | YES       | YES |
| 8      | a        | 15.61       | 0.01782      | YES       | YES |
| 9      | a        | 19.76       | 0.08832      | YES       | YES |
| 10     | a        | 21.02       | 0.01751      | YES       | YES |
| 11     | a        | 22.83       | 0.01444      | YES       | YES |
| 12     | a        | 25.01       | 0.09849      | YES       | YES |
| 13     | a        | 28.07       | 0.09778      | YES       | YES |
| 14     | a        | 28.85       | 0.07754      | YES       | YES |
| 15     | a        | 33.34       | 0.08605      | YES       | YES |
| 16     | a        | 34.33       | 0.02106      | YES       | YES |
| 17     | a        | 36.95       | 0.08671      | YES       | YES |
| 18     | a        | 39.02       | 0.22681      | YES       | YES |
| 19     | a        | 43.13       | 0.06376      | YES       | YES |
| 20     | a        | 45.70       | 0.06916      | YES       | YES |
| 21     | a        | 46.80       | 0.11693      | YES       | YES |



|    |   |        |         |     |     |
|----|---|--------|---------|-----|-----|
| 22 | a | 48.54  | 0.04603 | YES | YES |
| 23 | a | 49.50  | 0.01155 | YES | YES |
| 24 | a | 52.26  | 0.08134 | YES | YES |
| 25 | a | 55.13  | 0.03485 | YES | YES |
| 26 | a | 55.75  | 0.05599 | YES | YES |
| 27 | a | 59.14  | 0.23960 | YES | YES |
| 28 | a | 61.07  | 0.13591 | YES | YES |
| 29 | a | 65.31  | 0.04894 | YES | YES |
| 30 | a | 66.26  | 0.12136 | YES | YES |
| 31 | a | 68.09  | 0.14353 | YES | YES |
| 32 | a | 72.00  | 0.03412 | YES | YES |
| 33 | a | 77.71  | 0.46801 | YES | YES |
| 34 | a | 79.60  | 0.54428 | YES | YES |
| 35 | a | 81.34  | 0.13460 | YES | YES |
| 36 | a | 84.45  | 0.42437 | YES | YES |
| 37 | a | 94.04  | 1.09115 | YES | YES |
| 38 | a | 100.67 | 0.19508 | YES | YES |
| 39 | a | 101.97 | 1.22266 | YES | YES |
| 40 | a | 112.76 | 1.04695 | YES | YES |
| 41 | a | 118.07 | 0.38322 | YES | YES |
| 42 | a | 119.45 | 1.14026 | YES | YES |
| 43 | a | 132.83 | 2.59192 | YES | YES |
| 44 | a | 151.08 | 0.08445 | YES | YES |
| 45 | a | 158.22 | 1.46814 | YES | YES |
| 46 | a | 160.89 | 0.37913 | YES | YES |
| 47 | a | 165.44 | 0.09534 | YES | YES |
| 48 | a | 168.65 | 0.35909 | YES | YES |
| 49 | a | 175.18 | 2.44640 | YES | YES |
| 50 | a | 182.00 | 0.72852 | YES | YES |

### S7.18 Complex [4'd-Z]<sup>+</sup>

SCF Energy (au) (RI)BP86/SV(P) -4006.3388213990  
SCF Energy (au) PBE0/def2-TZVPP -4005.684556838  
SCF Energy (au) PBE0/def2-TZVPP -4005.7350602130 (CH<sub>2</sub>Cl<sub>2</sub>  
Correction)  
Zero Point Energy (au) 0.9801083  
Chemical potential (kJ mol<sup>-1</sup>) 2290.07  
Dispersion correction (au) PBE0/def2-TZVPP -0.25261122

xyz coordinates

126

|    |          |          |          |
|----|----------|----------|----------|
| C  | -2.16027 | 1.37719  | 0.21697  |
| C  | -0.96587 | 2.11602  | 0.15376  |
| Ru | -0.16936 | 0.19078  | 0.05274  |
| P  | -0.14929 | -0.44144 | 2.36077  |
| P  | 1.99590  | 0.39632  | 0.86575  |
| P  | 0.17289  | -2.06815 | -0.83587 |
| P  | 0.05927  | 0.28199  | -2.35304 |
| C  | 1.70670  | -0.71536 | 2.35128  |
| C  | 0.81312  | -1.41635 | -2.47522 |
| C  | -0.90214 | -2.01495 | 2.98035  |
| C  | -2.04942 | -2.53805 | 2.35082  |
| C  | -2.64489 | -3.71920 | 2.82886  |
| C  | -2.09528 | -4.38711 | 3.93546  |
| C  | -0.95088 | -3.86837 | 4.56984  |
| C  | -0.35870 | -2.68573 | 4.09918  |
| C  | -0.52014 | 0.70736  | 3.76637  |
| C  | -1.69387 | 1.49080  | 3.69759  |
| C  | -2.05330 | 2.32629  | 4.76878  |
| C  | -1.24666 | 2.39019  | 5.91749  |
| C  | -0.07521 | 1.61674  | 5.99058  |
| C  | 0.28714  | 0.77950  | 4.92264  |
| C  | 2.64417  | 1.93350  | 1.69071  |
| C  | 1.74667  | 2.80075  | 2.34872  |
| C  | 2.22761  | 3.89582  | 3.08343  |
| C  | 3.60730  | 4.15108  | 3.15245  |
| C  | 4.50585  | 3.30373  | 2.48306  |
| C  | 4.03092  | 2.19672  | 1.75880  |
| C  | 3.49776  | -0.22873 | -0.00645 |
| C  | 4.37011  | -1.17136 | 0.57876  |
| C  | 5.54943  | -1.55326 | -0.08416 |
| C  | 5.86898  | -1.00081 | -1.33612 |
| C  | 5.00450  | -0.06103 | -1.92591 |
| C  | 3.82634  | 0.32447  | -1.26486 |
| C  | -1.24765 | -3.15416 | -1.35060 |
| C  | -2.56656 | -2.66889 | -1.26896 |
| C  | -3.64699 | -3.45980 | -1.69711 |
| C  | -3.41636 | -4.74495 | -2.21466 |
| C  | -2.10115 | -5.23546 | -2.30562 |
| C  | -1.02129 | -4.44797 | -1.87473 |
| C  | 1.39969  | -3.35674 | -0.30511 |
| C  | 1.10611  | -4.11647 | 0.85295  |

|   |          |          |          |
|---|----------|----------|----------|
| C | 1.97626  | -5.13210 | 1.28036  |
| C | 3.14913  | -5.41123 | 0.55609  |
| C | 3.44558  | -4.66616 | -0.59645 |
| C | 2.58036  | -3.64233 | -1.02281 |
| C | -1.53202 | 0.25086  | -3.30439 |
| C | -1.90151 | -0.80641 | -4.16218 |
| C | -3.07774 | -0.72201 | -4.92720 |
| C | -3.89440 | 0.41826  | -4.84842 |
| C | -3.53811 | 1.47182  | -3.98763 |
| C | -2.36922 | 1.38703  | -3.21388 |
| C | 1.07113  | 1.35830  | -3.47511 |
| C | 0.87898  | 2.75663  | -3.45223 |
| C | 1.57254  | 3.58352  | -4.35107 |
| C | 2.46391  | 3.02517  | -5.28290 |
| C | 2.65711  | 1.63344  | -5.31525 |
| C | 1.96375  | 0.80213  | -4.41886 |
| H | 2.28516  | -0.46089 | 3.26429  |
| H | 1.88342  | -1.77729 | 2.07183  |
| H | 0.61015  | -2.03727 | -3.37387 |
| H | 1.90971  | -1.26168 | -2.37647 |
| H | -2.47435 | -2.02672 | 1.47362  |
| H | -3.54075 | -4.11858 | 2.32670  |
| H | -2.55881 | -5.31536 | 4.30781  |
| H | -0.51819 | -4.38684 | 5.44126  |
| H | 0.53211  | -2.28754 | 4.61271  |
| H | -2.32773 | 1.45351  | 2.79733  |
| H | -2.96961 | 2.93527  | 4.70093  |
| H | -1.52912 | 3.04598  | 6.75725  |
| H | 0.56586  | 1.66514  | 6.88601  |
| H | 1.21339  | 0.18828  | 5.00426  |
| H | 0.66160  | 2.63533  | 2.26869  |
| H | 1.51284  | 4.56391  | 3.58989  |
| H | 3.98300  | 5.01721  | 3.72155  |
| H | 5.58964  | 3.50232  | 2.52124  |
| H | 4.75266  | 1.54118  | 1.24803  |
| H | 4.14387  | -1.60908 | 1.56393  |
| H | 6.22440  | -2.28684 | 0.38613  |
| H | 6.79732  | -1.29795 | -1.85098 |
| H | 5.25035  | 0.38403  | -2.90384 |
| H | 3.16609  | 1.07439  | -1.73188 |
| H | -2.74848 | -1.65627 | -0.87492 |
| H | -4.67248 | -3.06390 | -1.61996 |
| H | -4.26245 | -5.36875 | -2.54698 |
| H | -1.91280 | -6.24389 | -2.70948 |
| H | 0.00216  | -4.85127 | -1.94184 |
| H | 0.17782  | -3.92969 | 1.41680  |
| H | 1.72760  | -5.71691 | 2.18097  |
| H | 3.82727  | -6.21494 | 0.88661  |
| H | 4.35734  | -4.88194 | -1.17702 |
| H | 2.83959  | -3.07818 | -1.93201 |
| H | -1.27828 | -1.70959 | -4.24877 |
| H | -3.35015 | -1.55429 | -5.59655 |
| H | -4.80849 | 0.48777  | -5.46067 |
| H | -4.17406 | 2.36945  | -3.91651 |
| H | -2.10550 | 2.21725  | -2.53856 |
| H | 0.18597  | 3.21147  | -2.72796 |

|   |          |          |          |
|---|----------|----------|----------|
| H | 1.41453  | 4.67345  | -4.31649 |
| H | 3.00628  | 3.67510  | -5.98885 |
| H | 3.34651  | 1.18639  | -6.05041 |
| H | 2.11789  | -0.28743 | -4.47514 |
| C | -3.18771 | 0.66061  | 0.24908  |
| C | -4.45773 | 0.01299  | 0.30688  |
| C | -0.93374 | 3.48719  | 0.06909  |
| H | -1.91994 | 3.98634  | 0.15756  |
| C | 0.16915  | 4.43265  | -0.11432 |
| C | -7.02861 | -1.16787 | 0.43276  |
| C | -6.26032 | -1.02695 | 1.60333  |
| C | -4.98763 | -0.44459 | 1.54662  |
| C | -5.24517 | -0.13826 | -0.86965 |
| C | -6.51661 | -0.72243 | -0.80049 |
| H | -8.03240 | -1.62057 | 0.48289  |
| H | -6.66106 | -1.36886 | 2.57149  |
| H | -4.39139 | -0.32555 | 2.46476  |
| H | -4.84329 | 0.21789  | -1.83125 |
| H | -7.11993 | -0.82461 | -1.71744 |
| C | 2.20380  | 6.38901  | -0.48103 |
| C | 0.90539  | 6.78164  | -0.10915 |
| C | -0.09665 | 5.81731  | 0.06522  |
| C | 1.48282  | 4.06144  | -0.49823 |
| C | 2.48416  | 5.02405  | -0.67925 |
| H | 2.99399  | 7.14472  | -0.62175 |
| H | 0.67139  | 7.84845  | 0.04157  |
| H | -1.11456 | 6.13359  | 0.35124  |
| H | 1.70536  | 2.99821  | -0.66673 |
| H | 3.49642  | 4.70752  | -0.97961 |

\$vibrational spectrum

| #     | mode | symmetry | wave number | IR intensity | selection |
|-------|------|----------|-------------|--------------|-----------|
| rules |      |          |             |              |           |
| #     |      |          | cm** (-1)   | km/mol       | IR        |
| RAMAN |      |          |             |              |           |
| 1     |      |          | 0.00        | 0.00000      | - -       |
| 2     |      |          | 0.00        | 0.00000      | - -       |
| 3     |      |          | 0.00        | 0.00000      | - -       |
| 4     |      |          | 0.00        | 0.00000      | - -       |
| 5     |      |          | 0.00        | 0.00000      | - -       |
| 6     |      |          | 0.00        | 0.00000      | - -       |
| 7     |      | a        | 12.17       | 0.02123      | YES YES   |
| 8     |      | a        | 17.73       | 0.02985      | YES YES   |
| 9     |      | a        | 22.59       | 0.02556      | YES YES   |
| 10    |      | a        | 24.07       | 0.08191      | YES YES   |
| 11    |      | a        | 26.01       | 0.05363      | YES YES   |
| 12    |      | a        | 28.84       | 0.12139      | YES YES   |
| 13    |      | a        | 30.13       | 0.00214      | YES YES   |
| 14    |      | a        | 31.45       | 0.11839      | YES YES   |
| 15    |      | a        | 34.20       | 0.04195      | YES YES   |
| 16    |      | a        | 37.62       | 0.02236      | YES YES   |
| 17    |      | a        | 38.17       | 0.16063      | YES YES   |
| 18    |      | a        | 39.74       | 0.01541      | YES YES   |
| 19    |      | a        | 41.71       | 0.06494      | YES YES   |
| 20    |      | a        | 43.47       | 0.03257      | YES YES   |
| 21    |      | a        | 46.55       | 0.05315      | YES YES   |

|    |   |        |         |     |     |
|----|---|--------|---------|-----|-----|
| 22 | a | 48.12  | 0.04263 | YES | YES |
| 23 | a | 50.57  | 0.07805 | YES | YES |
| 24 | a | 51.77  | 0.09709 | YES | YES |
| 25 | a | 57.23  | 0.02408 | YES | YES |
| 26 | a | 57.97  | 0.06608 | YES | YES |
| 27 | a | 60.06  | 0.02200 | YES | YES |
| 28 | a | 62.41  | 0.05759 | YES | YES |
| 29 | a | 66.03  | 0.32809 | YES | YES |
| 30 | a | 68.59  | 0.04174 | YES | YES |
| 31 | a | 71.94  | 0.19997 | YES | YES |
| 32 | a | 73.76  | 0.12544 | YES | YES |
| 33 | a | 77.43  | 0.00487 | YES | YES |
| 34 | a | 83.63  | 0.14471 | YES | YES |
| 35 | a | 86.38  | 0.07212 | YES | YES |
| 36 | a | 91.69  | 0.92026 | YES | YES |
| 37 | a | 98.78  | 1.20842 | YES | YES |
| 38 | a | 100.31 | 0.57792 | YES | YES |
| 39 | a | 102.57 | 0.48789 | YES | YES |
| 40 | a | 109.15 | 1.55592 | YES | YES |
| 41 | a | 119.62 | 0.48851 | YES | YES |
| 42 | a | 128.39 | 1.59616 | YES | YES |
| 43 | a | 142.91 | 1.26907 | YES | YES |
| 44 | a | 152.98 | 0.14951 | YES | YES |
| 45 | a | 156.98 | 0.75730 | YES | YES |
| 46 | a | 162.51 | 0.19896 | YES | YES |
| 47 | a | 166.87 | 0.77034 | YES | YES |
| 48 | a | 174.93 | 0.31466 | YES | YES |
| 49 | a | 175.47 | 0.68496 | YES | YES |
| 50 | a | 179.13 | 0.70898 | YES | YES |

### S7.19 Complex TS<sub>[Pd-Z]+[4'-Z]</sub>

SCF Energy (au) (RI)BP86/SV(P) -4006.3087507350  
SCF Energy (au) PBE0/def2-TZVPP -4005.652523614  
SCF Energy (au) PBE0/def2-TZVPP -4005.7045801208 (CH<sub>2</sub>Cl<sub>2</sub>  
Correction)  
Zero Point Energy (au) 0.9773334  
Chemical potential (kJ mol<sup>-1</sup>) 2272.31  
Dispersion correction (au) PBE0/def2-TZVPP -0.24437589

xyz coordinates

126

|    |          |          |          |
|----|----------|----------|----------|
| C  | -1.68366 | 0.39690  | -1.07997 |
| C  | -0.83985 | 1.70227  | 0.35317  |
| Ru | -0.01303 | 0.03314  | 0.03772  |
| P  | -1.27328 | -1.29510 | 1.58414  |
| P  | 1.41543  | -0.55821 | 1.91801  |
| P  | 0.92502  | -1.82864 | -1.38351 |
| P  | 1.52703  | 0.94933  | -1.55200 |
| C  | 0.22703  | -1.87382 | 2.54802  |
| C  | 2.27099  | -0.69421 | -2.04981 |
| C  | -2.16183 | -2.82073 | 1.04315  |
| C  | -2.62583 | -2.93179 | -0.28403 |
| C  | -3.32108 | -4.08523 | -0.69031 |
| C  | -3.55128 | -5.12984 | 0.22007  |
| C  | -3.09212 | -5.02062 | 1.54616  |
| C  | -2.40480 | -3.86881 | 1.96019  |
| C  | -2.46566 | -0.54132 | 2.77053  |
| C  | -3.45951 | 0.30723  | 2.23203  |
| C  | -4.44242 | 0.86060  | 3.06858  |
| C  | -4.44135 | 0.57703  | 4.44528  |
| C  | -3.45286 | -0.26317 | 4.98589  |
| C  | -2.46777 | -0.82171 | 4.15404  |
| C  | 1.56137  | 0.59599  | 3.36775  |
| C  | 0.43521  | 1.35490  | 3.75397  |
| C  | 0.48035  | 2.15585  | 4.90732  |
| C  | 1.65743  | 2.22992  | 5.67216  |
| C  | 2.78925  | 1.49636  | 5.27951  |
| C  | 2.74338  | 0.67716  | 4.13797  |
| C  | 3.08513  | -1.34829 | 1.87489  |
| C  | 3.36081  | -2.55455 | 2.55382  |
| C  | 4.66159  | -3.08636 | 2.55674  |
| C  | 5.70178  | -2.41818 | 1.88886  |
| C  | 5.43703  | -1.21298 | 1.21546  |
| C  | 4.13651  | -0.68095 | 1.20599  |
| C  | 0.07131  | -2.46147 | -2.90706 |
| C  | -0.86872 | -1.64254 | -3.57137 |
| C  | -1.48663 | -2.08670 | -4.75299 |
| C  | -1.17977 | -3.35125 | -5.28275 |
| C  | -0.24724 | -4.17171 | -4.62551 |
| C  | 0.37594  | -3.73358 | -3.44504 |
| C  | 1.78976  | -3.34913 | -0.78067 |
| C  | 1.01766  | -4.32501 | -0.10705 |

|   |          |          |          |
|---|----------|----------|----------|
| C | 1.60422  | -5.52802 | 0.31924  |
| C | 2.96798  | -5.77286 | 0.08036  |
| C | 3.74006  | -4.81024 | -0.59071 |
| C | 3.15601  | -3.60591 | -1.02087 |
| C | 0.89257  | 1.77873  | -3.07088 |
| C | 0.92998  | 1.20121  | -4.35691 |
| C | 0.44449  | 1.91473  | -5.46746 |
| C | -0.08435 | 3.20537  | -5.30355 |
| C | -0.13245 | 3.78274  | -4.02148 |
| C | 0.34998  | 3.07520  | -2.90999 |
| C | 2.95603  | 2.03081  | -1.10604 |
| C | 2.97402  | 2.71153  | 0.12733  |
| C | 4.05374  | 3.55018  | 0.45785  |
| C | 5.12440  | 3.70387  | -0.43782 |
| C | 5.11244  | 3.02521  | -1.67121 |
| C | 4.03037  | 2.19836  | -2.01011 |
| H | 0.14335  | -1.94785 | 3.65255  |
| H | 0.52595  | -2.86137 | 2.13380  |
| H | 2.54406  | -0.84254 | -3.11577 |
| H | 3.18199  | -0.81972 | -1.42547 |
| H | -2.44660 | -2.11070 | -0.99689 |
| H | -3.68111 | -4.16463 | -1.72878 |
| H | -4.09447 | -6.03367 | -0.10127 |
| H | -3.27699 | -5.83549 | 2.26531  |
| H | -2.06397 | -3.78878 | 3.00642  |
| H | -3.46001 | 0.53464  | 1.15349  |
| H | -5.21261 | 1.52239  | 2.64022  |
| H | -5.21274 | 1.01369  | 5.10048  |
| H | -3.44627 | -0.48862 | 6.06486  |
| H | -1.70290 | -1.47677 | 4.60144  |
| H | -0.48753 | 1.32807  | 3.15319  |
| H | -0.41023 | 2.73510  | 5.19877  |
| H | 1.69404  | 2.86470  | 6.57303  |
| H | 3.71981  | 1.55360  | 5.86869  |
| H | 3.63559  | 0.09790  | 3.85548  |
| H | 2.56547  | -3.08826 | 3.09778  |
| H | 4.86265  | -4.02816 | 3.09278  |
| H | 6.72252  | -2.83423 | 1.89879  |
| H | 6.24889  | -0.67618 | 0.69795  |
| H | 3.94778  | 0.27812  | 0.69587  |
| H | -1.13372 | -0.65829 | -3.15685 |
| H | -2.22073 | -1.43601 | -5.25553 |
| H | -1.66961 | -3.69989 | -6.20680 |
| H | 0.00047  | -5.16607 | -5.03204 |
| H | 1.10206  | -4.39325 | -2.94612 |
| H | -0.05985 | -4.15954 | 0.06020  |
| H | 0.98638  | -6.28244 | 0.83332  |
| H | 3.42725  | -6.71900 | 0.41045  |
| H | 4.80746  | -4.99777 | -0.79118 |
| H | 3.78108  | -2.87641 | -1.55927 |
| H | 1.33361  | 0.18910  | -4.51334 |
| H | 0.48621  | 1.45505  | -6.46832 |
| H | -0.45703 | 3.76505  | -6.17704 |
| H | -0.54447 | 4.79606  | -3.88442 |
| H | 0.31056  | 3.53989  | -1.91090 |
| H | 2.13517  | 2.58546  | 0.82959  |

|   |          |          |          |
|---|----------|----------|----------|
| H | 4.05409  | 4.08653  | 1.42044  |
| H | 5.97134  | 4.36025  | -0.17899 |
| H | 5.94809  | 3.14987  | -2.37933 |
| H | 4.01992  | 1.69148  | -2.98990 |
| C | -2.75239 | 0.65663  | -1.66722 |
| C | -3.95365 | 0.97147  | -2.37045 |
| C | -1.46850 | 2.88754  | 0.38946  |
| H | -2.35293 | 2.96392  | -0.27034 |
| C | -1.15729 | 4.11455  | 1.14485  |
| C | -6.33529 | 1.60393  | -3.77609 |
| C | -6.37918 | 0.74261  | -2.66405 |
| C | -5.20590 | 0.42755  | -1.96678 |
| C | -3.92625 | 1.84116  | -3.49775 |
| C | -5.10571 | 2.15033  | -4.18806 |
| H | -7.26067 | 1.84914  | -4.32244 |
| H | -7.34025 | 0.31137  | -2.33835 |
| H | -5.24062 | -0.25074 | -1.09907 |
| H | -2.96192 | 2.26689  | -3.81843 |
| H | -5.06739 | 2.82548  | -5.05896 |
| C | -0.65803 | 6.55990  | 2.51085  |
| C | -1.77686 | 6.43394  | 1.66950  |
| C | -2.02331 | 5.22877  | 0.99610  |
| C | -0.03393 | 4.25941  | 1.99634  |
| C | 0.20998  | 5.46419  | 2.66995  |
| H | -0.46281 | 7.50664  | 3.04016  |
| H | -2.46656 | 7.28351  | 1.53508  |
| H | -2.90441 | 5.14146  | 0.33819  |
| H | 0.64865  | 3.40917  | 2.14388  |
| H | 1.08942  | 5.54822  | 3.32986  |

\$vibrational spectrum

| # mode | symmetry | wave number | IR intensity | selection |     |
|--------|----------|-------------|--------------|-----------|-----|
| rules  |          | cm**(-1)    | km/mol       | IR        |     |
| RAMAN  |          |             |              |           |     |
| 1      | a        | -179.32     | 0.00000      | YES       | YES |
| 2      |          | 0.00        | 0.00000      | -         | -   |
| 3      |          | 0.00        | 0.00000      | -         | -   |
| 4      |          | 0.00        | 0.00000      | -         | -   |
| 5      |          | 0.00        | 0.00000      | -         | -   |
| 6      |          | 0.00        | 0.00000      | -         | -   |
| 7      |          | 0.00        | 0.00000      | -         | -   |
| 8      | a        | 6.22        | 0.03634      | YES       | YES |
| 9      | a        | 11.62       | 0.00122      | YES       | YES |
| 10     | a        | 15.70       | 0.01118      | YES       | YES |
| 11     | a        | 18.06       | 0.05933      | YES       | YES |
| 12     | a        | 19.37       | 0.02535      | YES       | YES |
| 13     | a        | 21.94       | 0.16054      | YES       | YES |
| 14     | a        | 22.75       | 0.05944      | YES       | YES |
| 15     | a        | 24.84       | 0.00480      | YES       | YES |
| 16     | a        | 28.10       | 0.01765      | YES       | YES |
| 17     | a        | 31.33       | 0.00070      | YES       | YES |
| 18     | a        | 33.65       | 0.04247      | YES       | YES |
| 19     | a        | 36.16       | 0.04925      | YES       | YES |
| 20     | a        | 39.56       | 0.13067      | YES       | YES |
| 21     | a        | 42.08       | 0.01663      | YES       | YES |



|    |   |        |         |     |     |
|----|---|--------|---------|-----|-----|
| 22 | a | 43.11  | 0.08998 | YES | YES |
| 23 | a | 45.10  | 0.01133 | YES | YES |
| 24 | a | 45.83  | 0.04709 | YES | YES |
| 25 | a | 46.91  | 0.03025 | YES | YES |
| 26 | a | 49.50  | 0.11875 | YES | YES |
| 27 | a | 52.47  | 0.07499 | YES | YES |
| 28 | a | 57.34  | 0.26290 | YES | YES |
| 29 | a | 60.32  | 0.16188 | YES | YES |
| 30 | a | 61.72  | 0.07834 | YES | YES |
| 31 | a | 63.78  | 0.09983 | YES | YES |
| 32 | a | 66.38  | 0.09301 | YES | YES |
| 33 | a | 72.03  | 0.52860 | YES | YES |
| 34 | a | 77.11  | 0.01654 | YES | YES |
| 35 | a | 82.22  | 0.24934 | YES | YES |
| 36 | a | 86.63  | 0.48491 | YES | YES |
| 37 | a | 88.09  | 2.92062 | YES | YES |
| 38 | a | 93.51  | 1.77859 | YES | YES |
| 39 | a | 97.99  | 0.62334 | YES | YES |
| 40 | a | 107.54 | 3.43020 | YES | YES |
| 41 | a | 110.32 | 2.13425 | YES | YES |
| 42 | a | 118.09 | 0.69327 | YES | YES |
| 43 | a | 127.36 | 0.92979 | YES | YES |
| 44 | a | 145.62 | 4.53994 | YES | YES |
| 45 | a | 148.83 | 1.32699 | YES | YES |
| 46 | a | 155.94 | 2.38854 | YES | YES |
| 47 | a | 162.97 | 8.31884 | YES | YES |
| 48 | a | 163.42 | 1.80885 | YES | YES |
| 49 | a | 173.68 | 9.49670 | YES | YES |
| 50 | a | 174.71 | 4.03520 | YES | YES |

## S7.20Complex [Cf]

SCF Energy (au) (RI)BP86/SV(P) -4234.7732464370  
SCF Energy (au) PBE0/def2-TZVPP -4234.120804577  
SCF Energy (au) PBE0/def2-TZVPP -4234.1560106665 (CH<sub>2</sub>Cl<sub>2</sub>  
Correction)  
Zero Point Energy (au) 1.0279261  
Chemical potential (kJ mol<sup>-1</sup>) 2387.57  
Dispersion correction (au) PBE0/def2-TZVPP -0.24829032

xyz coordinates

133

|    |          |          |          |
|----|----------|----------|----------|
| Ru | 0.31950  | -0.38748 | 0.12636  |
| C  | -1.28342 | -0.16760 | -1.07424 |
| C  | -0.15892 | 1.41999  | 0.87660  |
| P  | -0.98899 | -1.54049 | 1.71268  |
| P  | 1.69179  | -0.76347 | 2.10743  |
| P  | 1.11794  | -2.12757 | -1.38474 |
| P  | 1.78664  | 0.61024  | -1.42430 |
| C  | 0.37280  | -1.80790 | 2.97673  |
| C  | 2.32237  | -0.97220 | -2.28017 |
| C  | -1.71819 | -3.20977 | 1.37525  |
| C  | -2.30262 | -3.42691 | 0.10831  |
| C  | -2.91211 | -4.65919 | -0.18480 |
| C  | -2.93426 | -5.68572 | 0.77510  |
| C  | -2.34771 | -5.47713 | 2.03597  |
| C  | -1.74616 | -4.24345 | 2.33751  |
| C  | -2.37617 | -0.70713 | 2.61481  |
| C  | -3.12874 | 0.27363  | 1.93449  |
| C  | -4.22584 | 0.88162  | 2.57072  |
| C  | -4.57087 | 0.52756  | 3.88608  |
| C  | -3.81820 | -0.44413 | 4.57014  |
| C  | -2.72822 | -1.06236 | 3.93572  |
| C  | 2.04307  | 0.57364  | 3.34973  |
| C  | 0.96948  | 1.26321  | 3.95783  |
| C  | 1.21767  | 2.30098  | 4.87153  |
| C  | 2.53674  | 2.67246  | 5.18242  |
| C  | 3.60939  | 1.99978  | 4.57323  |
| C  | 3.36563  | 0.95888  | 3.66045  |
| C  | 3.23988  | -1.77897 | 2.25708  |
| C  | 3.49566  | -2.57938 | 3.39278  |
| C  | 4.68736  | -3.31548 | 3.49307  |
| C  | 5.64558  | -3.25053 | 2.46555  |
| C  | 5.40689  | -2.44530 | 1.33978  |
| C  | 4.20852  | -1.71779 | 1.23531  |
| C  | 0.08184  | -2.79896 | -2.77410 |
| C  | -0.46431 | -1.91333 | -3.73078 |
| C  | -1.28022 | -2.39998 | -4.76560 |
| C  | -1.57168 | -3.77172 | -4.85435 |
| C  | -1.04219 | -4.65703 | -3.90040 |
| C  | -0.22298 | -4.17481 | -2.86483 |
| C  | 2.14546  | -3.62043 | -0.97754 |
| C  | 1.86536  | -4.35356 | 0.19303  |

|   |          |          |          |
|---|----------|----------|----------|
| C | 2.60061  | -5.50982 | 0.50724  |
| C | 3.63196  | -5.94086 | -0.34322 |
| C | 3.91692  | -5.21906 | -1.51625 |
| C | 3.17424  | -4.07056 | -1.83482 |
| C | 1.16790  | 1.73658  | -2.75955 |
| C | 1.80512  | 1.82479  | -4.01695 |
| C | 1.33856  | 2.72665  | -4.98738 |
| C | 0.23684  | 3.55449  | -4.70531 |
| C | -0.39820 | 3.47194  | -3.45449 |
| C | 0.05798  | 2.56280  | -2.48307 |
| C | 3.34232  | 1.47358  | -0.90752 |
| C | 3.27711  | 2.32445  | 0.21756  |
| C | 4.41575  | 3.03975  | 0.62703  |
| C | 5.62764  | 2.90516  | -0.07226 |
| C | 5.69982  | 2.05405  | -1.18926 |
| C | 4.56173  | 1.34430  | -1.60860 |
| H | 0.14229  | -1.48140 | 4.01307  |
| H | 0.69025  | -2.87200 | 2.99582  |
| H | 2.22483  | -0.98047 | -3.38659 |
| H | 3.36649  | -1.23506 | -2.00792 |
| H | -2.27666 | -2.62139 | -0.64677 |
| H | -3.36614 | -4.81592 | -1.17687 |
| H | -3.40922 | -6.65320 | 0.54115  |
| H | -2.36203 | -6.27874 | 2.79351  |
| H | -1.30190 | -4.09183 | 3.33606  |
| H | -2.84574 | 0.55999  | 0.90820  |
| H | -4.80846 | 1.64607  | 2.03099  |
| H | -5.42903 | 1.01053  | 4.38291  |
| H | -4.08328 | -0.72656 | 5.60281  |
| H | -2.15656 | -1.83251 | 4.48119  |
| H | -0.07180 | 1.00270  | 3.71248  |
| H | 0.36810  | 2.83132  | 5.33157  |
| H | 2.72795  | 3.48952  | 5.89794  |
| H | 4.64892  | 2.28136  | 4.81161  |
| H | 4.21793  | 0.43981  | 3.19434  |
| H | 2.76462  | -2.62142 | 4.21772  |
| H | 4.87260  | -3.93875 | 4.38400  |
| H | 6.58196  | -3.82740 | 2.54546  |
| H | 6.15583  | -2.38437 | 0.53324  |
| H | 4.02691  | -1.08261 | 0.35333  |
| H | -0.26692 | -0.83198 | -3.66732 |
| H | -1.70225 | -1.69370 | -5.49891 |
| H | -2.21533 | -4.15001 | -5.66598 |
| H | -1.26271 | -5.73607 | -3.96140 |
| H | 0.18617  | -4.88282 | -2.12698 |
| H | 1.05294  | -4.02152 | 0.85941  |
| H | 2.36713  | -6.07383 | 1.42512  |
| H | 4.21425  | -6.84361 | -0.09428 |
| H | 4.71935  | -5.55743 | -2.19311 |
| H | 3.39319  | -3.52898 | -2.77050 |
| H | 2.67911  | 1.19238  | -4.24858 |
| H | 1.84163  | 2.78596  | -5.96712 |
| H | -0.12706 | 4.26568  | -5.46590 |
| H | -1.26518 | 4.11431  | -3.22872 |
| H | -0.44700 | 2.48457  | -1.50617 |
| H | 2.32588  | 2.42167  | 0.77027  |

|   |          |          |          |
|---|----------|----------|----------|
| H | 4.35196  | 3.70103  | 1.50656  |
| H | 6.52089  | 3.46378  | 0.25394  |
| H | 6.64794  | 1.94408  | -1.74209 |
| H | 4.63256  | 0.68982  | -2.49413 |
| C | -2.31919 | -0.02435 | -1.75342 |
| C | -3.50117 | 0.14053  | -2.54094 |
| C | -0.44793 | 2.56783  | 1.26846  |
| C | -0.78781 | 3.87627  | 1.73416  |
| C | -5.86941 | 0.46980  | -4.11569 |
| C | -5.90644 | -0.25445 | -2.90238 |
| C | -4.75107 | -0.41437 | -2.13552 |
| C | -3.48909 | 0.86502  | -3.76220 |
| C | -4.64670 | 1.03084  | -4.54085 |
| O | -7.05496 | 0.57043  | -4.79505 |
| H | -6.86819 | -0.68542 | -2.58037 |
| H | -4.80005 | -0.98003 | -1.19111 |
| H | -2.54277 | 1.31716  | -4.10044 |
| H | -4.58091 | 1.60507  | -5.47756 |
| C | -1.46959 | 6.49476  | 2.67033  |
| C | -2.07848 | 5.34875  | 3.23031  |
| C | -1.74602 | 4.07212  | 2.77254  |
| C | -0.19095 | 5.04258  | 1.18666  |
| C | -0.52004 | 6.33061  | 1.63964  |
| O | -1.86303 | 7.70119  | 3.18707  |
| H | -2.82213 | 5.49132  | 4.03106  |
| H | -2.23822 | 3.18966  | 3.21205  |
| H | 0.55168  | 4.93104  | 0.38009  |
| H | -0.02700 | 7.19960  | 1.17800  |
| C | -1.29186 | 8.87889  | 2.65476  |
| C | -7.07481 | 1.29262  | -6.00916 |
| H | -0.18440 | 8.90891  | 2.79895  |
| H | -1.74974 | 9.72437  | 3.20830  |
| H | -1.51353 | 8.99581  | 1.56615  |
| H | -6.78637 | 2.36208  | -5.86422 |
| H | -8.11943 | 1.24873  | -6.38031 |
| H | -6.39881 | 0.84116  | -6.77564 |

\$vibrational spectrum

| # mode | symmetry | wave number | IR intensity | selection |     |
|--------|----------|-------------|--------------|-----------|-----|
| rules  |          | cm** (-1)   | km/mol       | IR        |     |
| RAMAN  |          |             |              |           |     |
| 1      |          | 0.00        | 0.00000      | -         | -   |
| 2      |          | 0.00        | 0.00000      | -         | -   |
| 3      |          | 0.00        | 0.00000      | -         | -   |
| 4      |          | 0.00        | 0.00000      | -         | -   |
| 5      |          | 0.00        | 0.00000      | -         | -   |
| 6      |          | 0.00        | 0.00000      | -         | -   |
| 7      | a        | 11.27       | 0.00477      | YES       | YES |
| 8      | a        | 12.25       | 0.02528      | YES       | YES |
| 9      | a        | 14.35       | 0.08764      | YES       | YES |
| 10     | a        | 15.44       | 0.12850      | YES       | YES |
| 11     | a        | 18.94       | 0.14673      | YES       | YES |
| 12     | a        | 20.87       | 0.32747      | YES       | YES |
| 13     | a        | 22.23       | 0.02065      | YES       | YES |
| 14     | a        | 24.02       | 0.35150      | YES       | YES |

|    |   |        |         |     |     |
|----|---|--------|---------|-----|-----|
| 15 | a | 26.17  | 0.00238 | YES | YES |
| 16 | a | 28.33  | 0.29717 | YES | YES |
| 17 | a | 30.35  | 0.17013 | YES | YES |
| 18 | a | 33.26  | 0.06997 | YES | YES |
| 19 | a | 37.80  | 0.04063 | YES | YES |
| 20 | a | 40.06  | 0.08393 | YES | YES |
| 21 | a | 43.60  | 0.01152 | YES | YES |
| 22 | a | 46.22  | 0.08959 | YES | YES |
| 23 | a | 47.35  | 0.09415 | YES | YES |
| 24 | a | 49.32  | 0.25332 | YES | YES |
| 25 | a | 50.27  | 0.07985 | YES | YES |
| 26 | a | 50.57  | 0.02113 | YES | YES |
| 27 | a | 52.21  | 0.24900 | YES | YES |
| 28 | a | 52.69  | 0.00090 | YES | YES |
| 29 | a | 53.27  | 0.33846 | YES | YES |
| 30 | a | 59.29  | 0.09685 | YES | YES |
| 31 | a | 60.19  | 0.34993 | YES | YES |
| 32 | a | 61.66  | 0.07078 | YES | YES |
| 33 | a | 65.09  | 0.81945 | YES | YES |
| 34 | a | 70.40  | 1.56617 | YES | YES |
| 35 | a | 72.99  | 0.95870 | YES | YES |
| 36 | a | 80.37  | 0.04517 | YES | YES |
| 37 | a | 81.53  | 0.76200 | YES | YES |
| 38 | a | 85.53  | 2.46450 | YES | YES |
| 39 | a | 86.31  | 0.72670 | YES | YES |
| 40 | a | 95.52  | 0.42318 | YES | YES |
| 41 | a | 98.70  | 0.34721 | YES | YES |
| 42 | a | 107.34 | 0.55830 | YES | YES |
| 43 | a | 113.09 | 0.40714 | YES | YES |
| 44 | a | 114.94 | 0.86567 | YES | YES |
| 45 | a | 115.62 | 3.25247 | YES | YES |
| 46 | a | 140.50 | 0.10295 | YES | YES |
| 47 | a | 142.09 | 0.08821 | YES | YES |
| 48 | a | 160.68 | 0.00296 | YES | YES |
| 49 | a | 161.39 | 0.45342 | YES | YES |
| 50 | a | 161.69 | 0.36241 | YES | YES |

## S7.21 Complex [Df]<sup>+</sup>

SCF Energy (au) (RI)BP86/SV(P) -4235.2041310740  
SCF Energy (au) PBE0/def2-TZVPP -4234.549190831  
SCF Energy (au) PBE0/def2-TZVPP -4234.6060584902 (CH<sub>2</sub>Cl<sub>2</sub>  
Correction)  
Zero Point Energy (au) 1.0403407  
Chemical potential (kJ mol<sup>-1</sup>) 2419.95  
Dispersion correction (au) PBE0/def2-TZVPP -0.25127961

xyz coordinates

134

|    |          |          |          |
|----|----------|----------|----------|
| Ru | 0.48918  | -0.15599 | 0.36926  |
| C  | -1.05863 | -0.05878 | -0.94088 |
| C  | 0.04367  | 1.47999  | 1.10696  |
| P  | -0.80304 | -1.44765 | 1.92289  |
| P  | 1.91763  | -0.73682 | 2.29061  |
| P  | 1.36878  | -2.02041 | -1.18912 |
| P  | 2.01550  | 0.78795  | -1.22763 |
| C  | 0.64476  | -1.90391 | 3.03141  |
| C  | 2.62300  | -0.83559 | -1.94005 |
| C  | -1.58949 | -3.05260 | 1.45904  |
| C  | -2.10861 | -3.22252 | 0.15826  |
| C  | -2.75497 | -4.42326 | -0.18656 |
| C  | -2.88162 | -5.45693 | 0.75613  |
| C  | -2.36258 | -5.29138 | 2.05348  |
| C  | -1.72214 | -4.09315 | 2.40729  |
| C  | -2.07828 | -0.64086 | 2.98064  |
| C  | -2.94193 | 0.29057  | 2.36561  |
| C  | -3.97948 | 0.88356  | 3.10373  |
| C  | -4.16027 | 0.55467  | 4.45773  |
| C  | -3.30297 | -0.37333 | 5.07526  |
| C  | -2.26642 | -0.97280 | 4.34090  |
| C  | 2.18500  | 0.53791  | 3.61136  |
| C  | 1.07868  | 1.05584  | 4.32301  |
| C  | 1.27012  | 2.01983  | 5.32724  |
| C  | 2.56139  | 2.48949  | 5.62317  |
| C  | 3.66279  | 1.98790  | 4.90999  |
| C  | 3.47946  | 1.01608  | 3.91105  |
| C  | 3.52596  | -1.64058 | 2.28972  |
| C  | 3.78572  | -2.68257 | 3.20654  |
| C  | 5.04562  | -3.30238 | 3.23507  |
| C  | 6.06156  | -2.88098 | 2.35966  |
| C  | 5.81358  | -1.83715 | 1.45275  |
| C  | 4.55044  | -1.22233 | 1.41321  |
| C  | 0.40046  | -2.61778 | -2.64748 |
| C  | -0.04278 | -1.69626 | -3.62300 |
| C  | -0.78064 | -2.14109 | -4.73185 |
| C  | -1.09419 | -3.50315 | -4.87598 |
| C  | -0.66301 | -4.42240 | -3.90541 |
| C  | 0.07956  | -3.98515 | -2.79533 |
| C  | 2.32506  | -3.52762 | -0.70979 |
| C  | 1.77084  | -4.39879 | 0.25400  |

|   |          |          |          |
|---|----------|----------|----------|
| C | 2.42326  | -5.59753 | 0.58997  |
| C | 3.64066  | -5.93349 | -0.02524 |
| C | 4.19813  | -5.07220 | -0.98627 |
| C | 3.54249  | -3.87920 | -1.33227 |
| C | 1.40168  | 1.81231  | -2.63540 |
| C | 1.97707  | 1.74360  | -3.92352 |
| C | 1.53631  | 2.60496  | -4.94176 |
| C | 0.52697  | 3.54822  | -4.67978 |
| C | -0.04494 | 3.62366  | -3.39831 |
| C | 0.38468  | 2.75635  | -2.37999 |
| C | 3.54410  | 1.70438  | -0.72940 |
| C | 3.48459  | 2.59251  | 0.36551  |
| C | 4.61502  | 3.34406  | 0.73012  |
| C | 5.81448  | 3.21093  | 0.01066  |
| C | 5.88091  | 2.32757  | -1.08169 |
| C | 4.75121  | 1.58067  | -1.45436 |
| H | 0.49691  | -1.79152 | 4.12607  |
| H | 0.94676  | -2.95013 | 2.81305  |
| H | 2.68772  | -0.89193 | -3.04691 |
| H | 3.62172  | -1.05775 | -1.50885 |
| H | -2.00822 | -2.41019 | -0.58154 |
| H | -3.15906 | -4.54700 | -1.20424 |
| H | -3.38868 | -6.39676 | 0.48244  |
| H | -2.46303 | -6.09822 | 2.79798  |
| H | -1.33366 | -3.97341 | 3.43292  |
| H | -2.80187 | 0.54926  | 1.30344  |
| H | -4.64323 | 1.61445  | 2.61472  |
| H | -4.97268 | 1.02345  | 5.03684  |
| H | -3.44286 | -0.63685 | 6.13651  |
| H | -1.61143 | -1.70459 | 4.84246  |
| H | 0.05372  | 0.71564  | 4.10198  |
| H | 0.39815  | 2.40386  | 5.88145  |
| H | 2.70921  | 3.24364  | 6.41334  |
| H | 4.68042  | 2.34477  | 5.13860  |
| H | 4.35744  | 0.62079  | 3.37697  |
| H | 3.01008  | -3.01212 | 3.91702  |
| H | 5.23621  | -4.11678 | 3.95298  |
| H | 7.05102  | -3.36578 | 2.38837  |
| H | 6.60838  | -1.49514 | 0.77000  |
| H | 4.37136  | -0.39227 | 0.71000  |
| H | 0.17639  | -0.62184 | -3.52407 |
| H | -1.11981 | -1.41070 | -5.48374 |
| H | -1.67470 | -3.84834 | -5.74711 |
| H | -0.89695 | -5.49432 | -4.01320 |
| H | 0.41944  | -4.72250 | -2.05180 |
| H | 0.80442  | -4.15479 | 0.72633  |
| H | 1.97374  | -6.27341 | 1.33573  |
| H | 4.15448  | -6.87202 | 0.23956  |
| H | 5.14803  | -5.33513 | -1.47996 |
| H | 3.98397  | -3.23185 | -2.10756 |
| H | 2.78069  | 1.02264  | -4.14769 |
| H | 1.99038  | 2.54185  | -5.94425 |
| H | 0.18731  | 4.22782  | -5.47859 |
| H | -0.83753 | 4.35875  | -3.18442 |
| H | -0.07535 | 2.81569  | -1.38183 |
| H | 2.54559  | 2.70088  | 0.93069  |

|   |          |          |          |
|---|----------|----------|----------|
| H | 4.55557  | 4.03799  | 1.58424  |
| H | 6.70080  | 3.79986  | 0.29810  |
| H | 6.81736  | 2.22435  | -1.65419 |
| H | 4.81791  | 0.90529  | -2.32389 |
| C | -2.05904 | 0.05446  | -1.67073 |
| C | -3.20535 | 0.17418  | -2.52009 |
| C | -0.23731 | 2.68500  | 1.60583  |
| H | 0.49535  | 3.03447  | 2.36542  |
| C | -1.36033 | 3.59329  | 1.31688  |
| C | -5.49447 | 0.41829  | -4.20868 |
| C | -5.55809 | -0.33905 | -3.01424 |
| C | -4.43990 | -0.45626 | -2.18966 |
| C | -3.16094 | 0.93019  | -3.71971 |
| C | -4.28184 | 1.05584  | -4.55473 |
| O | -6.63791 | 0.47165  | -4.94265 |
| H | -6.51152 | -0.82659 | -2.75646 |
| H | -4.50915 | -1.04576 | -1.26133 |
| H | -2.22253 | 1.43745  | -3.99591 |
| H | -4.20005 | 1.65605  | -5.47305 |
| C | -3.49881 | 5.40840  | 0.80500  |
| C | -2.53122 | 5.70666  | 1.78913  |
| C | -1.48171 | 4.80593  | 2.03261  |
| C | -2.34148 | 3.30946  | 0.32666  |
| C | -3.38807 | 4.19783  | 0.07735  |
| O | -4.55401 | 6.20376  | 0.48434  |
| H | -2.58163 | 6.63800  | 2.37212  |
| H | -0.73513 | 5.05705  | 2.80504  |
| H | -2.27382 | 2.37747  | -0.26006 |
| H | -4.14598 | 3.97776  | -0.69084 |
| C | -6.64781 | 1.22191  | -6.14673 |
| C | -4.71855 | 7.43477  | 1.17131  |
| H | -6.43276 | 2.30091  | -5.96194 |
| H | -7.67037 | 1.12219  | -6.56246 |
| H | -5.91354 | 0.82423  | -6.88677 |
| H | -5.62784 | 7.90473  | 0.74629  |
| H | -3.84831 | 8.11456  | 1.01280  |
| H | -4.86636 | 7.27913  | 2.26613  |

\$vibrational spectrum

| # mode | symmetry | wave number | IR intensity | selection |     |
|--------|----------|-------------|--------------|-----------|-----|
| rules  |          | cm**(-1)    | km/mol       | IR        |     |
| #      |          |             |              |           |     |
| RAMAN  |          |             |              |           |     |
| 1      |          | 0.00        | 0.00000      | -         | -   |
| 2      |          | 0.00        | 0.00000      | -         | -   |
| 3      |          | 0.00        | 0.00000      | -         | -   |
| 4      |          | 0.00        | 0.00000      | -         | -   |
| 5      |          | 0.00        | 0.00000      | -         | -   |
| 6      |          | 0.00        | 0.00000      | -         | -   |
| 7      | a        | 10.67       | 0.01154      | YES       | YES |
| 8      | a        | 11.84       | 0.05060      | YES       | YES |
| 9      | a        | 13.92       | 0.00510      | YES       | YES |
| 10     | a        | 15.21       | 0.06884      | YES       | YES |
| 11     | a        | 16.12       | 0.05369      | YES       | YES |
| 12     | a        | 19.84       | 0.04883      | YES       | YES |
| 13     | a        | 22.73       | 0.48667      | YES       | YES |



|    |   |        |         |     |     |
|----|---|--------|---------|-----|-----|
| 14 | a | 27.99  | 0.05247 | YES | YES |
| 15 | a | 30.26  | 0.01802 | YES | YES |
| 16 | a | 32.34  | 0.02177 | YES | YES |
| 17 | a | 33.15  | 0.08910 | YES | YES |
| 18 | a | 36.05  | 0.27182 | YES | YES |
| 19 | a | 38.58  | 0.03722 | YES | YES |
| 20 | a | 39.27  | 0.04760 | YES | YES |
| 21 | a | 42.37  | 0.03563 | YES | YES |
| 22 | a | 42.59  | 0.15370 | YES | YES |
| 23 | a | 45.32  | 0.11170 | YES | YES |
| 24 | a | 46.20  | 0.11162 | YES | YES |
| 25 | a | 47.10  | 0.35466 | YES | YES |
| 26 | a | 51.49  | 0.02818 | YES | YES |
| 27 | a | 53.23  | 0.06458 | YES | YES |
| 28 | a | 55.27  | 0.23694 | YES | YES |
| 29 | a | 57.87  | 0.23265 | YES | YES |
| 30 | a | 59.78  | 0.43939 | YES | YES |
| 31 | a | 60.97  | 0.12292 | YES | YES |
| 32 | a | 62.26  | 0.29840 | YES | YES |
| 33 | a | 65.97  | 0.60189 | YES | YES |
| 34 | a | 69.31  | 0.66592 | YES | YES |
| 35 | a | 73.37  | 1.48325 | YES | YES |
| 36 | a | 73.76  | 1.20947 | YES | YES |
| 37 | a | 79.90  | 0.82420 | YES | YES |
| 38 | a | 80.96  | 0.27115 | YES | YES |
| 39 | a | 84.86  | 0.83707 | YES | YES |
| 40 | a | 94.63  | 0.37927 | YES | YES |
| 41 | a | 97.52  | 0.35276 | YES | YES |
| 42 | a | 106.74 | 0.73899 | YES | YES |
| 43 | a | 113.72 | 1.79826 | YES | YES |
| 44 | a | 121.27 | 2.04094 | YES | YES |
| 45 | a | 126.79 | 1.29231 | YES | YES |
| 46 | a | 137.97 | 0.72125 | YES | YES |
| 47 | a | 141.93 | 0.27027 | YES | YES |
| 48 | a | 155.18 | 0.08404 | YES | YES |
| 49 | a | 159.33 | 0.33122 | YES | YES |
| 50 | a | 163.22 | 0.05578 | YES | YES |

## S7.22 Complex [Ff]<sup>+</sup>

SCF Energy (au) (RI)BP86/SV(P) -4235.2090162150  
SCF Energy (au) PBE0/def2-TZVPP -4234.555965009  
SCF Energy (au) PBE0/def2-TZVPP -4234.6094258562 (CH<sub>2</sub>Cl<sub>2</sub>  
Correction)  
Zero Point Energy (au) 1.0406652  
Chemical potential (kJ mol<sup>-1</sup>) 2423.64  
Dispersion correction (au) PBE0/def2-TZVPP -0.25249907

xyz coordinates

134

|    |          |          |          |
|----|----------|----------|----------|
| C  | 0.31332  | -1.89028 | 0.28411  |
| C  | -1.70397 | -0.20023 | -2.77470 |
| C  | 0.99251  | 0.72117  | -3.66035 |
| C  | 0.57259  | -2.07635 | -3.09959 |
| C  | 1.56162  | 0.21259  | 2.60446  |
| C  | -0.96732 | 1.72697  | 3.12060  |
| C  | -1.02891 | -1.11976 | 3.32402  |
| C  | 3.54137  | -0.75536 | 0.60713  |
| P  | -2.26284 | -0.25582 | -0.97899 |
| C  | -0.12237 | 1.94742  | -0.63890 |
| P  | 2.14224  | 0.42062  | 0.82363  |
| P  | 0.13958  | -0.39750 | -2.47064 |
| P  | -0.28596 | 0.22577  | 2.29110  |
| Ru | -0.05098 | 0.11335  | -0.11831 |
| C  | 0.60982  | -3.08033 | 0.50767  |
| C  | -3.16195 | -1.85334 | -0.78697 |
| C  | -3.62177 | 0.98983  | -0.80587 |
| C  | 2.96100  | 2.07516  | 0.78541  |
| H  | -1.88449 | 0.81866  | -3.17945 |
| H  | -2.16401 | -0.95027 | -3.45246 |
| H  | 1.92335  | 1.00020  | 3.29813  |
| H  | 1.88690  | -0.77777 | 2.98462  |
| C  | -2.23024 | -3.16120 | 4.86971  |
| C  | -0.93901 | -3.33867 | 4.34469  |
| C  | -0.34212 | -2.32908 | 3.57105  |
| C  | -2.32946 | -0.94930 | 3.85323  |
| C  | -2.92448 | -1.96534 | 4.61871  |
| H  | -2.69457 | -3.95424 | 5.47857  |
| H  | -0.38569 | -4.27319 | 4.53108  |
| H  | 0.65880  | -2.50521 | 3.15046  |
| H  | -2.88337 | -0.01290 | 3.68140  |
| H  | -3.93603 | -1.81371 | 5.02967  |
| C  | -2.22301 | 3.85942  | 4.47834  |
| C  | -1.07501 | 3.25567  | 5.02275  |
| C  | -0.45629 | 2.18653  | 4.35526  |
| C  | -2.11388 | 2.34244  | 2.57494  |
| C  | -2.74452 | 3.39800  | 3.25848  |
| H  | -2.71303 | 4.69122  | 5.01034  |
| H  | -0.66385 | 3.61177  | 5.98148  |
| H  | 0.42047  | 1.70236  | 4.81641  |
| H  | -2.52072 | 1.99176  | 1.61190  |

|   |          |          |          |
|---|----------|----------|----------|
| H | -3.64466 | 3.86438  | 2.82669  |
| C | 5.72751  | -2.50043 | 0.25462  |
| C | 4.69491  | -2.46361 | -0.69728 |
| C | 3.60093  | -1.59852 | -0.52036 |
| C | 4.58229  | -0.79611 | 1.56347  |
| C | 5.66825  | -1.66863 | 1.38804  |
| H | 6.58268  | -3.18229 | 0.11619  |
| H | 4.72918  | -3.12222 | -1.57997 |
| H | 2.77757  | -1.60091 | -1.25113 |
| H | 4.55545  | -0.13636 | 2.44734  |
| H | 6.47563  | -1.69456 | 2.13819  |
| C | 4.14044  | 4.64059  | 0.65706  |
| C | 4.78400  | 3.53870  | 0.06992  |
| C | 4.19952  | 2.26150  | 0.13151  |
| C | 2.31213  | 3.19209  | 1.35856  |
| C | 2.90326  | 4.46383  | 1.30088  |
| H | 4.60289  | 5.64017  | 0.61279  |
| H | 5.75679  | 3.66796  | -0.43260 |
| H | 4.72420  | 1.40370  | -0.31890 |
| H | 1.33307  | 3.08024  | 1.85313  |
| H | 2.38616  | 5.32380  | 1.75604  |
| C | 1.23372  | -4.65293 | -4.04650 |
| C | 0.09609  | -4.46600 | -3.24239 |
| C | -0.23124 | -3.18830 | -2.76222 |
| C | 1.71782  | -2.26956 | -3.90439 |
| C | 2.04457  | -3.55366 | -4.37328 |
| H | 1.48778  | -5.65859 | -4.41937 |
| H | -0.54147 | -5.32464 | -2.97760 |
| H | -1.11634 | -3.06580 | -2.11886 |
| H | 2.35463  | -1.41518 | -4.18311 |
| H | 2.93496  | -3.68987 | -5.00889 |
| C | 2.37565  | 2.35700  | -5.49726 |
| C | 1.16415  | 1.74722  | -5.87009 |
| C | 0.47697  | 0.92847  | -4.95929 |
| C | 2.20732  | 1.33734  | -3.29179 |
| C | 2.89748  | 2.14915  | -4.20914 |
| H | 2.91450  | 2.99692  | -6.21501 |
| H | 0.75244  | 1.90584  | -6.88021 |
| H | -0.46277 | 0.44330  | -5.27187 |
| H | 2.61255  | 1.19416  | -2.27627 |
| H | 3.84449  | 2.62686  | -3.91007 |
| C | -4.64000 | -4.22953 | -0.43405 |
| C | -3.70691 | -3.82927 | 0.53637  |
| C | -2.96298 | -2.64757 | 0.36115  |
| C | -4.11029 | -2.25588 | -1.75692 |
| C | -4.83977 | -3.44189 | -1.58323 |
| H | -5.21799 | -5.15816 | -0.29613 |
| H | -3.54791 | -4.44007 | 1.43953  |
| H | -2.21521 | -2.35172 | 1.11206  |
| H | -4.29677 | -1.63577 | -2.65003 |
| H | -5.57451 | -3.74888 | -2.34547 |
| C | -5.66054 | 2.91664  | -0.44741 |
| C | -4.50305 | 3.23983  | -1.17716 |
| C | -3.48600 | 2.28699  | -1.35123 |
| C | -4.78412 | 0.67458  | -0.06496 |
| C | -5.79509 | 1.63469  | 0.11195  |

|   |          |           |          |
|---|----------|-----------|----------|
| H | -6.45884 | 3.66529   | -0.31532 |
| H | -4.38306 | 4.24443   | -1.61351 |
| H | -2.57609 | 2.57206   | -1.90260 |
| H | -4.90998 | -0.32934  | 0.37025  |
| H | -6.69926 | 1.37177   | 0.68531  |
| C | 0.92718  | -4.44639  | 0.78469  |
| C | 1.55310  | -7.17385  | 1.35745  |
| C | 2.50743  | -6.15838  | 1.59269  |
| C | 2.19221  | -4.82106  | 1.30863  |
| C | -0.01878 | -5.48818  | 0.55571  |
| C | 0.28520  | -6.81984  | 0.83540  |
| O | 1.75135  | -8.49718  | 1.59581  |
| H | 3.50235  | -6.39921  | 1.99556  |
| H | 2.94848  | -4.04037  | 1.48840  |
| H | -1.01113 | -5.22765  | 0.15442  |
| H | -0.44753 | -7.62329  | 0.65930  |
| C | 0.05677  | 3.13325   | -1.23023 |
| C | -0.42636 | 4.49973   | -0.98079 |
| H | 0.73713  | 3.04138   | -2.10743 |
| C | -1.31747 | 7.18384   | -0.58520 |
| C | -1.56899 | 6.18549   | 0.38744  |
| C | -1.13234 | 4.87530   | 0.19195  |
| C | -0.17440 | 5.51046   | -1.93827 |
| C | -0.60991 | 6.83278   | -1.75579 |
| O | -1.78512 | 8.42850   | -0.30000 |
| H | -2.11038 | 6.47388   | 1.30233  |
| H | -1.32814 | 4.12234   | 0.97014  |
| H | 0.37947  | 5.25656   | -2.85800 |
| H | -0.38861 | 7.58069   | -2.53137 |
| C | 3.00045  | -8.92316  | 2.11835  |
| C | -1.55662 | 9.47637   | -1.23004 |
| H | -0.46710 | 9.66051   | -1.38318 |
| H | -2.01953 | 10.38277  | -0.79140 |
| H | -2.03378 | 9.26355   | -2.21574 |
| H | 3.20500  | -8.47048  | 3.11722  |
| H | 3.84091  | -8.67895  | 1.42670  |
| H | 2.92834  | -10.02371 | 2.22695  |

\$vibrational spectrum

| # mode | symmetry | wave number | IR intensity | selection |     |
|--------|----------|-------------|--------------|-----------|-----|
| rules  |          | cm**(-1)    | km/mol       | IR        |     |
| #      |          |             |              |           |     |
| RAMAN  |          |             |              |           |     |
| 1      |          | 0.00        | 0.00000      | -         | -   |
| 2      |          | 0.00        | 0.00000      | -         | -   |
| 3      |          | 0.00        | 0.00000      | -         | -   |
| 4      |          | 0.00        | 0.00000      | -         | -   |
| 5      |          | 0.00        | 0.00000      | -         | -   |
| 6      |          | 0.00        | 0.00000      | -         | -   |
| 7      | a        | 10.61       | 0.00186      | YES       | YES |
| 8      | a        | 12.01       | 0.00228      | YES       | YES |
| 9      | a        | 14.50       | 0.00983      | YES       | YES |
| 10     | a        | 17.43       | 0.05946      | YES       | YES |
| 11     | a        | 18.41       | 0.03717      | YES       | YES |
| 12     | a        | 23.23       | 0.03213      | YES       | YES |
| 13     | a        | 25.47       | 0.17281      | YES       | YES |

|    |   |        |         |     |     |
|----|---|--------|---------|-----|-----|
| 14 | a | 27.81  | 0.12961 | YES | YES |
| 15 | a | 28.50  | 0.26087 | YES | YES |
| 16 | a | 30.95  | 0.25715 | YES | YES |
| 17 | a | 32.89  | 0.27118 | YES | YES |
| 18 | a | 33.25  | 0.20383 | YES | YES |
| 19 | a | 35.43  | 0.09355 | YES | YES |
| 20 | a | 39.12  | 0.06427 | YES | YES |
| 21 | a | 42.38  | 0.03030 | YES | YES |
| 22 | a | 44.05  | 0.02402 | YES | YES |
| 23 | a | 46.75  | 0.13417 | YES | YES |
| 24 | a | 47.78  | 0.04950 | YES | YES |
| 25 | a | 50.67  | 0.28057 | YES | YES |
| 26 | a | 52.82  | 0.31159 | YES | YES |
| 27 | a | 53.98  | 0.04537 | YES | YES |
| 28 | a | 56.93  | 0.04475 | YES | YES |
| 29 | a | 58.40  | 0.39753 | YES | YES |
| 30 | a | 60.16  | 0.98987 | YES | YES |
| 31 | a | 62.02  | 0.06798 | YES | YES |
| 32 | a | 65.64  | 0.05492 | YES | YES |
| 33 | a | 67.36  | 0.01886 | YES | YES |
| 34 | a | 71.07  | 0.81656 | YES | YES |
| 35 | a | 74.98  | 0.23772 | YES | YES |
| 36 | a | 76.63  | 1.67168 | YES | YES |
| 37 | a | 82.12  | 0.05735 | YES | YES |
| 38 | a | 85.00  | 0.30075 | YES | YES |
| 39 | a | 90.07  | 0.80544 | YES | YES |
| 40 | a | 98.13  | 1.68848 | YES | YES |
| 41 | a | 100.10 | 2.75052 | YES | YES |
| 42 | a | 104.54 | 1.14727 | YES | YES |
| 43 | a | 117.30 | 0.12917 | YES | YES |
| 44 | a | 123.01 | 1.19877 | YES | YES |
| 45 | a | 126.84 | 2.09928 | YES | YES |
| 46 | a | 146.37 | 1.01387 | YES | YES |
| 47 | a | 148.72 | 0.39677 | YES | YES |
| 48 | a | 152.20 | 0.05643 | YES | YES |
| 49 | a | 160.91 | 0.57861 | YES | YES |
| 50 | a | 166.24 | 0.44079 | YES | YES |

## S7.23 Complex [3f]

SCF Energy (au) (RI)BP86/SV(P) -4234.7768657230  
SCF Energy (au) PBE0/def2-TZVPP -4234.128290494  
SCF Energy (au) PBE0/def2-TZVPP -4234.1583984054 (CH<sub>2</sub>Cl<sub>2</sub>  
Correction)  
Zero Point Energy (au) 1.0280986  
Chemical potential (kJ mol<sup>-1</sup>) 2381.16  
Dispersion correction (au) PBE0/def2-TZVPP -0.24757938

xyz coordinates

133

|    |          |          |          |
|----|----------|----------|----------|
| C  | 0.17075  | -2.01850 | 0.58963  |
| C  | -1.59128 | 0.17476  | -2.73692 |
| C  | 1.32223  | 0.75479  | -3.36990 |
| C  | 0.34936  | -1.93868 | -3.28041 |
| C  | 1.46358  | -0.11454 | 2.67456  |
| C  | -0.69901 | 1.82617  | 3.17557  |
| C  | -1.35750 | -0.93313 | 3.35660  |
| C  | 3.54628  | -0.76824 | 0.62548  |
| P  | -2.23313 | -0.29550 | -1.02737 |
| C  | -0.19550 | 1.92164  | -0.55685 |
| P  | 2.05012  | 0.28377  | 0.93169  |
| P  | 0.18976  | -0.32081 | -2.37807 |
| P  | -0.35169 | 0.21865  | 2.31428  |
| Ru | -0.07943 | -0.06278 | -0.03009 |
| C  | 0.38454  | -3.14777 | 1.08379  |
| C  | -3.05810 | -1.93296 | -1.29020 |
| C  | -3.69709 | 0.79343  | -0.66837 |
| C  | 2.79462  | 1.97332  | 0.99573  |
| H  | -1.64208 | 1.28070  | -2.81252 |
| H  | -2.07079 | -0.30089 | -3.61888 |
| H  | 1.93326  | 0.41009  | 3.53342  |
| H  | 1.59562  | -1.21256 | 2.77627  |
| C  | -3.03266 | -2.59160 | 4.91564  |
| C  | -1.63712 | -2.66331 | 5.05781  |
| C  | -0.80224 | -1.83942 | 4.28169  |
| C  | -2.76174 | -0.86942 | 3.21460  |
| C  | -3.59309 | -1.69238 | 3.99044  |
| H  | -3.68547 | -3.23904 | 5.52451  |
| H  | -1.18781 | -3.37116 | 5.77378  |
| H  | 0.28972  | -1.91848 | 4.40193  |
| H  | -3.21187 | -0.16739 | 2.49176  |
| H  | -4.68750 | -1.63050 | 3.87038  |
| C  | -1.26817 | 4.24966  | 4.50479  |
| C  | -0.71266 | 3.17011  | 5.21754  |
| C  | -0.43375 | 1.96327  | 4.55814  |
| C  | -1.25948 | 2.90776  | 2.46828  |
| C  | -1.54237 | 4.11487  | 3.13457  |
| H  | -1.48923 | 5.19752  | 5.02381  |
| H  | -0.50252 | 3.26677  | 6.29608  |
| H  | -0.02045 | 1.11567  | 5.13174  |
| H  | -1.44799 | 2.80758  | 1.38771  |

|   |          |          |          |
|---|----------|----------|----------|
| H | -1.97475 | 4.95676  | 2.56943  |
| C | 5.81112  | -2.37820 | 0.12770  |
| C | 4.59738  | -2.64608 | -0.52808 |
| C | 3.46684  | -1.84768 | -0.27801 |
| C | 4.77050  | -0.49996 | 1.27759  |
| C | 5.89490  | -1.30518 | 1.03328  |
| H | 6.69706  | -3.00497 | -0.06920 |
| H | 4.52532  | -3.48409 | -1.24128 |
| H | 2.50652  | -2.06697 | -0.77044 |
| H | 4.85142  | 0.35206  | 1.97316  |
| H | 6.84564  | -1.08765 | 1.54823  |
| C | 3.99726  | 4.53189  | 0.93153  |
| C | 3.91429  | 3.76006  | -0.24181 |
| C | 3.31198  | 2.49405  | -0.21270 |
| C | 2.86272  | 2.76054  | 2.16296  |
| C | 3.46309  | 4.03310  | 2.13006  |
| H | 4.46828  | 5.52865  | 0.90674  |
| H | 4.31076  | 4.15152  | -1.19278 |
| H | 3.23835  | 1.90639  | -1.14275 |
| H | 2.43981  | 2.39864  | 3.11274  |
| H | 3.50919  | 4.63550  | 3.05255  |
| C | 0.48351  | -4.40217 | -4.65595 |
| C | 0.36797  | -4.37998 | -3.25693 |
| C | 0.29938  | -3.15448 | -2.56844 |
| C | 0.46524  | -1.96646 | -4.69046 |
| C | 0.53023  | -3.19159 | -5.37223 |
| H | 0.53766  | -5.36389 | -5.19349 |
| H | 0.32873  | -5.32275 | -2.68673 |
| H | 0.20490  | -3.13601 | -1.46900 |
| H | 0.51106  | -1.02420 | -5.26165 |
| H | 0.62085  | -3.20095 | -6.47155 |
| C | 3.19708  | 2.35934  | -4.75591 |
| C | 1.86340  | 2.77988  | -4.62693 |
| C | 0.93176  | 1.98493  | -3.93594 |
| C | 2.66865  | 0.34097  | -3.49945 |
| C | 3.59815  | 1.13636  | -4.18822 |
| H | 3.92600  | 2.98505  | -5.29745 |
| H | 1.53947  | 3.74119  | -5.05830 |
| H | -0.10382 | 2.34165  | -3.83596 |
| H | 2.99704  | -0.61577 | -3.05994 |
| H | 4.64293  | 0.79614  | -4.28180 |
| C | -4.36274 | -4.41563 | -1.62117 |
| C | -3.53058 | -4.19834 | -0.51125 |
| C | -2.87855 | -2.96266 | -0.34390 |
| C | -3.90399 | -2.15539 | -2.40111 |
| C | -4.54915 | -3.39055 | -2.56715 |
| H | -4.86759 | -5.38728 | -1.75389 |
| H | -3.37351 | -4.99933 | 0.22985  |
| H | -2.19881 | -2.80195 | 0.50824  |
| H | -4.07365 | -1.35565 | -3.14167 |
| H | -5.20288 | -3.55384 | -3.44030 |
| C | -5.88930 | 2.46334  | -0.01046 |
| C | -4.70740 | 3.01727  | -0.53214 |
| C | -3.61587 | 2.19295  | -0.85160 |
| C | -4.88713 | 0.24479  | -0.13687 |
| C | -5.97266 | 1.07554  | 0.19098  |

|   |          |           |          |
|---|----------|-----------|----------|
| H | -6.74401 | 3.11314   | 0.24142  |
| H | -4.62511 | 4.10578   | -0.68801 |
| H | -2.67998 | 2.64421   | -1.21825 |
| H | -4.97423 | -0.84269  | 0.01546  |
| H | -6.89397 | 0.62899   | 0.60129  |
| C | 0.59802  | -4.45743  | 1.61923  |
| C | 1.01903  | -7.08367  | 2.68302  |
| C | 2.05329  | -6.42056  | 1.98871  |
| C | 1.83885  | -5.13284  | 1.47088  |
| C | -0.42713 | -5.14950  | 2.33129  |
| C | -0.22357 | -6.43035  | 2.84849  |
| O | 1.11910  | -8.33670  | 3.22601  |
| H | 3.03532  | -6.89599  | 1.84417  |
| H | 2.65743  | -4.62567  | 0.93535  |
| H | -1.39848 | -4.65150  | 2.48006  |
| H | -1.02130 | -6.95719  | 3.39666  |
| C | -0.22219 | 3.11999   | -0.91311 |
| C | -0.26195 | 4.50921   | -1.24513 |
| C | -0.35448 | 7.30417   | -1.87830 |
| C | 0.41614  | 6.83484   | -0.78947 |
| C | 0.46208  | 5.47456   | -0.48147 |
| C | -1.02853 | 5.00626   | -2.33387 |
| C | -1.08016 | 6.37447   | -2.65185 |
| O | -0.33147 | 8.65641   | -2.09683 |
| H | 0.97857  | 7.57167   | -0.19339 |
| H | 1.07073  | 5.12602   | 0.36730  |
| H | -1.60799 | 4.29759   | -2.94904 |
| H | -1.69255 | 6.70083   | -3.50612 |
| C | 2.34201  | -9.03293  | 3.09229  |
| C | -1.09040 | 9.17730   | -3.16886 |
| H | -0.92972 | 10.27495  | -3.15960 |
| H | -2.18152 | 8.96983   | -3.04831 |
| H | -0.75625 | 8.77055   | -4.15430 |
| H | 3.18725  | -8.49019  | 3.58088  |
| H | 2.60447  | -9.21431  | 2.02181  |
| H | 2.20049  | -10.00969 | 3.59881  |

\$vibrational spectrum

| # mode | symmetry | wave number | IR intensity | selection |     |
|--------|----------|-------------|--------------|-----------|-----|
| rules  |          | cm** (-1)   | km/mol       | IR        |     |
| RAMAN  |          |             |              |           |     |
| 1      |          | 0.00        | 0.00000      | -         | -   |
| 2      |          | 0.00        | 0.00000      | -         | -   |
| 3      |          | 0.00        | 0.00000      | -         | -   |
| 4      |          | 0.00        | 0.00000      | -         | -   |
| 5      |          | 0.00        | 0.00000      | -         | -   |
| 6      |          | 0.00        | 0.00000      | -         | -   |
| 7      | a        | 7.14        | 0.13112      | YES       | YES |
| 8      | a        | 9.55        | 0.02099      | YES       | YES |
| 9      | a        | 12.71       | 0.08841      | YES       | YES |
| 10     | a        | 14.26       | 0.02676      | YES       | YES |
| 11     | a        | 15.54       | 0.03227      | YES       | YES |
| 12     | a        | 16.71       | 0.05607      | YES       | YES |
| 13     | a        | 20.55       | 0.03506      | YES       | YES |
| 14     | a        | 23.10       | 0.14980      | YES       | YES |



|    |   |        |         |     |     |
|----|---|--------|---------|-----|-----|
| 15 | a | 24.08  | 0.23393 | YES | YES |
| 16 | a | 24.86  | 0.06926 | YES | YES |
| 17 | a | 27.68  | 0.00474 | YES | YES |
| 18 | a | 30.38  | 0.22034 | YES | YES |
| 19 | a | 32.63  | 0.10142 | YES | YES |
| 20 | a | 35.09  | 0.01829 | YES | YES |
| 21 | a | 35.58  | 0.10487 | YES | YES |
| 22 | a | 36.98  | 0.07653 | YES | YES |
| 23 | a | 38.77  | 0.60359 | YES | YES |
| 24 | a | 43.04  | 0.07066 | YES | YES |
| 25 | a | 44.42  | 0.19543 | YES | YES |
| 26 | a | 47.03  | 0.15224 | YES | YES |
| 27 | a | 49.09  | 0.05154 | YES | YES |
| 28 | a | 51.56  | 0.02322 | YES | YES |
| 29 | a | 54.57  | 0.04472 | YES | YES |
| 30 | a | 56.93  | 0.51134 | YES | YES |
| 31 | a | 58.27  | 0.81711 | YES | YES |
| 32 | a | 59.39  | 0.08545 | YES | YES |
| 33 | a | 63.47  | 0.01792 | YES | YES |
| 34 | a | 67.69  | 1.61515 | YES | YES |
| 35 | a | 73.83  | 1.28762 | YES | YES |
| 36 | a | 74.13  | 0.33801 | YES | YES |
| 37 | a | 80.27  | 0.48452 | YES | YES |
| 38 | a | 90.07  | 1.18673 | YES | YES |
| 39 | a | 92.35  | 2.26898 | YES | YES |
| 40 | a | 97.97  | 0.55984 | YES | YES |
| 41 | a | 101.69 | 3.29076 | YES | YES |
| 42 | a | 105.91 | 0.20325 | YES | YES |
| 43 | a | 117.05 | 0.04937 | YES | YES |
| 44 | a | 118.31 | 0.47925 | YES | YES |
| 45 | a | 124.43 | 1.74093 | YES | YES |
| 46 | a | 134.21 | 0.07905 | YES | YES |
| 47 | a | 146.18 | 0.13495 | YES | YES |
| 48 | a | 150.16 | 0.03579 | YES | YES |
| 49 | a | 159.56 | 0.55590 | YES | YES |
| 50 | a | 163.45 | 0.22989 | YES | YES |

## S7.24 Complex [4f]<sup>+</sup>

SCF Energy (au) (RI)BP86/SV(P) -4235.2433512890  
SCF Energy (au) PBE0/def2-TZVPP -4234.590645656  
SCF Energy (au) PBE0/def2-TZVPP -4234.6453806515 (CH<sub>2</sub>Cl<sub>2</sub>  
Correction)  
Zero Point Energy (au) 1.0430186  
Chemical potential (kJ mol<sup>-1</sup>) 2438.19  
Dispersion correction (au) PBE0/def2-TZVPP -0.25601834

xyz coordinates

134

|   |          |          |         |
|---|----------|----------|---------|
| C | 1.71582  | -1.86429 | 2.74507 |
| C | 2.17876  | -2.00844 | 4.07443 |
| H | 2.34876  | -1.12042 | 4.70676 |
| C | 2.44294  | -3.28214 | 4.60009 |
| H | 2.80118  | -3.38186 | 5.63797 |
| C | 2.26291  | -4.42648 | 3.80033 |
| H | 2.47639  | -5.42637 | 4.21259 |
| C | 1.81815  | -4.28898 | 2.47623 |
| H | 1.67860  | -5.18014 | 1.84296 |
| C | 1.54305  | -3.01408 | 1.94797 |
| H | 1.18847  | -2.91439 | 0.91184 |
| C | 3.07794  | 0.56448  | 2.33513 |
| C | 4.10092  | 0.19552  | 1.43056 |
| H | 3.86827  | -0.45623 | 0.57157 |
| C | 5.41485  | 0.65283  | 1.62111 |
| H | 6.20443  | 0.35093  | 0.91349 |
| C | 5.72338  | 1.48658  | 2.71139 |
| H | 6.75552  | 1.84302  | 2.86153 |
| C | 4.71269  | 1.85653  | 3.61417 |
| H | 4.95005  | 2.50148  | 4.47624 |
| C | 3.39600  | 1.39577  | 3.43089 |
| H | 2.62233  | 1.68226  | 4.16226 |
| C | -2.34871 | 1.98502  | 2.72938 |
| C | -3.37404 | 2.43528  | 1.86971 |
| H | -3.51714 | 1.96217  | 0.88465 |
| C | -4.23905 | 3.46902  | 2.26992 |
| H | -5.04326 | 3.79976  | 1.59225 |
| C | -4.08105 | 4.07281  | 3.52823 |
| H | -4.75878 | 4.88295  | 3.84369 |
| C | -3.05835 | 3.63422  | 4.38733 |
| H | -2.93034 | 4.10016  | 5.37808 |
| C | -2.20215 | 2.59231  | 3.99528 |
| H | -1.42281 | 2.24917  | 4.69473 |
| C | -2.31248 | -0.82516 | 3.04818 |
| C | -1.69663 | -1.86580 | 3.77831 |
| H | -0.60191 | -1.91503 | 3.87936 |
| C | -2.47189 | -2.87374 | 4.37715 |
| H | -1.97097 | -3.67333 | 4.94672 |
| C | -3.87079 | -2.86279 | 4.25233 |
| H | -4.47728 | -3.65067 | 4.72816 |
| C | -4.49163 | -1.83518 | 3.52134 |

|   |          |          |          |
|---|----------|----------|----------|
| H | -5.58935 | -1.81107 | 3.42207  |
| C | -3.72087 | -0.82364 | 2.92515  |
| H | -4.23178 | -0.01813 | 2.37463  |
| C | 0.23698  | 0.63582  | 3.29443  |
| H | 0.18999  | 0.19986  | 4.31541  |
| H | 0.49206  | 1.71591  | 3.36525  |
| C | -1.17322 | 0.74789  | -3.25494 |
| C | -0.11197 | 1.42126  | -3.89937 |
| H | 0.48668  | 2.17403  | -3.36143 |
| C | 0.20065  | 1.13284  | -5.23761 |
| H | 1.02688  | 1.67016  | -5.73065 |
| C | -0.52964 | 0.16023  | -5.94157 |
| H | -0.28140 | -0.06424 | -6.99180 |
| C | -1.57514 | -0.52580 | -5.30106 |
| H | -2.15306 | -1.28990 | -5.84642 |
| C | -1.89682 | -0.23654 | -3.96458 |
| H | -2.72605 | -0.77508 | -3.47839 |
| C | -3.40045 | 0.87027  | -1.44650 |
| C | -3.97831 | -0.25205 | -0.81828 |
| H | -3.33417 | -0.99664 | -0.32381 |
| C | -5.37413 | -0.42690 | -0.82885 |
| H | -5.81489 | -1.31367 | -0.34507 |
| C | -6.19967 | 0.52255  | -1.45354 |
| H | -7.29369 | 0.38704  | -1.45755 |
| C | -5.62832 | 1.64538  | -2.08118 |
| H | -6.27252 | 2.38850  | -2.57932 |
| C | -4.23484 | 1.81595  | -2.08634 |
| H | -3.79739 | 2.68755  | -2.60218 |
| C | 1.69362  | 3.39966  | -0.96389 |
| C | 3.00100  | 3.03743  | -0.57441 |
| H | 3.15359  | 2.24836  | 0.17906  |
| C | 4.11819  | 3.67381  | -1.14210 |
| H | 5.13088  | 3.38163  | -0.81957 |
| C | 3.94503  | 4.67078  | -2.11653 |
| H | 4.82074  | 5.16734  | -2.56536 |
| C | 2.64698  | 5.03687  | -2.51163 |
| H | 2.49949  | 5.82385  | -3.26934 |
| C | 1.52828  | 4.41329  | -1.93342 |
| H | 0.52359  | 4.74755  | -2.23829 |
| C | 0.11186  | 3.96068  | 1.26591  |
| C | 1.14893  | 4.03903  | 2.22386  |
| H | 1.99067  | 3.32734  | 2.19096  |
| C | 1.14651  | 5.04519  | 3.20306  |
| H | 1.96999  | 5.09592  | 3.93440  |
| C | 0.10913  | 5.99291  | 3.23925  |
| H | 0.10921  | 6.78764  | 4.00296  |
| C | -0.92073 | 5.92730  | 2.28747  |
| H | -1.73429 | 6.67069  | 2.29930  |
| C | -0.92077 | 4.91958  | 1.30701  |
| H | -1.73851 | 4.90432  | 0.57052  |
| C | -1.23668 | 2.88711  | -1.17847 |
| H | -2.08623 | 3.29323  | -0.59112 |
| H | -1.09850 | 3.51510  | -2.08308 |
| C | -0.47266 | -1.88467 | -0.56032 |
| C | 0.56528  | -1.36339 | -1.13243 |
| C | 1.41468  | -0.31574 | -1.31842 |

|    |          |          |          |
|----|----------|----------|----------|
| C  | 2.51170  | 0.02956  | -2.04576 |
| H  | 2.90314  | 1.05345  | -1.92833 |
| C  | 3.25212  | -0.80557 | -2.99297 |
| C  | 2.94554  | -2.16218 | -3.26042 |
| H  | 2.10060  | -2.63947 | -2.73696 |
| C  | 3.69133  | -2.92246 | -4.16996 |
| H  | 3.41665  | -3.97354 | -4.34244 |
| C  | 4.78476  | -2.33698 | -4.85256 |
| O  | 5.57180  | -2.98144 | -5.75170 |
| C  | 5.10783  | -0.98228 | -4.59993 |
| H  | 5.96089  | -0.53934 | -5.13741 |
| C  | 4.35675  | -0.23994 | -3.68999 |
| H  | 4.62255  | 0.81491  | -3.50524 |
| C  | -1.32461 | -3.04535 | -0.57340 |
| C  | -1.23623 | -3.96150 | -1.65963 |
| H  | -0.52644 | -3.75315 | -2.47652 |
| C  | -2.03370 | -5.10953 | -1.72265 |
| H  | -1.92997 | -5.78519 | -2.58447 |
| C  | -2.96057 | -5.38298 | -0.68786 |
| O  | -3.78236 | -6.46148 | -0.64952 |
| C  | -3.06062 | -4.48257 | 0.39930  |
| H  | -3.77917 | -4.70992 | 1.20170  |
| C  | -2.26173 | -3.34037 | 0.45381  |
| H  | -2.34461 | -2.66335 | 1.31511  |
| P  | 1.39802  | -0.16399 | 2.06075  |
| P  | -1.31245 | 0.52518  | 2.23929  |
| P  | 0.25161  | 2.65259  | -0.05655 |
| P  | -1.56515 | 1.06882  | -1.48005 |
| Ru | -0.05890 | 0.30396  | 0.18517  |
| C  | 5.30762  | -4.34404 | -6.05117 |
| C  | -3.72822 | -7.41174 | -1.70497 |
| H  | -2.72005 | -7.88184 | -1.78238 |
| H  | -3.99684 | -6.95239 | -2.68499 |
| H  | -4.47408 | -8.19142 | -1.45287 |
| H  | 4.29156  | -4.47882 | -6.49117 |
| H  | 5.40526  | -4.99006 | -5.14721 |
| H  | 6.06906  | -4.64674 | -6.79726 |

\$vibrational spectrum

| # mode | symmetry | wave number | IR intensity | selection |     |
|--------|----------|-------------|--------------|-----------|-----|
| rules  |          | cm** (-1)   | km/mol       | IR        |     |
| #      |          |             |              |           |     |
| RAMAN  |          |             |              |           |     |
| 1      |          | 0.00        | 0.00000      | -         | -   |
| 2      |          | 0.00        | 0.00000      | -         | -   |
| 3      |          | 0.00        | 0.00000      | -         | -   |
| 4      |          | 0.00        | 0.00000      | -         | -   |
| 5      |          | 0.00        | 0.00000      | -         | -   |
| 6      |          | 0.00        | 0.00000      | -         | -   |
| 7      | a        | 12.39       | 0.02972      | YES       | YES |
| 8      | a        | 15.41       | 0.26108      | YES       | YES |
| 9      | a        | 18.11       | 0.15999      | YES       | YES |
| 10     | a        | 20.65       | 0.00820      | YES       | YES |
| 11     | a        | 22.45       | 0.28164      | YES       | YES |
| 12     | a        | 25.96       | 0.09356      | YES       | YES |
| 13     | a        | 28.29       | 0.42804      | YES       | YES |

|    |   |        |         |     |     |
|----|---|--------|---------|-----|-----|
| 14 | a | 32.33  | 0.14491 | YES | YES |
| 15 | a | 33.08  | 0.09505 | YES | YES |
| 16 | a | 36.58  | 0.01665 | YES | YES |
| 17 | a | 39.33  | 0.01124 | YES | YES |
| 18 | a | 40.95  | 0.09479 | YES | YES |
| 19 | a | 42.28  | 0.02055 | YES | YES |
| 20 | a | 44.61  | 0.10182 | YES | YES |
| 21 | a | 45.40  | 0.09462 | YES | YES |
| 22 | a | 45.71  | 0.06936 | YES | YES |
| 23 | a | 48.29  | 0.07996 | YES | YES |
| 24 | a | 50.10  | 0.19858 | YES | YES |
| 25 | a | 51.04  | 0.12871 | YES | YES |
| 26 | a | 52.49  | 0.28212 | YES | YES |
| 27 | a | 53.63  | 0.05196 | YES | YES |
| 28 | a | 57.79  | 0.17713 | YES | YES |
| 29 | a | 60.71  | 0.30883 | YES | YES |
| 30 | a | 64.69  | 0.11630 | YES | YES |
| 31 | a | 65.54  | 0.22203 | YES | YES |
| 32 | a | 69.62  | 0.63080 | YES | YES |
| 33 | a | 74.84  | 0.19869 | YES | YES |
| 34 | a | 75.57  | 0.08984 | YES | YES |
| 35 | a | 78.10  | 1.91525 | YES | YES |
| 36 | a | 79.77  | 0.29737 | YES | YES |
| 37 | a | 81.70  | 0.22718 | YES | YES |
| 38 | a | 90.41  | 0.08660 | YES | YES |
| 39 | a | 94.72  | 0.15416 | YES | YES |
| 40 | a | 100.58 | 0.16670 | YES | YES |
| 41 | a | 105.90 | 0.58539 | YES | YES |
| 42 | a | 110.59 | 0.31242 | YES | YES |
| 43 | a | 116.69 | 1.18750 | YES | YES |
| 44 | a | 132.42 | 1.22854 | YES | YES |
| 45 | a | 134.25 | 0.89028 | YES | YES |
| 46 | a | 142.25 | 0.60537 | YES | YES |
| 47 | a | 151.58 | 0.39777 | YES | YES |
| 48 | a | 163.34 | 0.11450 | YES | YES |
| 49 | a | 166.90 | 0.38039 | YES | YES |
| 50 | a | 170.71 | 1.09595 | YES | YES |

## S7.25 Complex [4'f]<sup>+</sup>

SCF Energy (au) (RI)BP86/SV(P) -4235.2450738280  
SCF Energy (au) PBE0/def2-TZVPP -4234.592607205  
SCF Energy (au) PBE0/def2-TZVPP -4234.6463803025 (CH<sub>2</sub>Cl<sub>2</sub>  
Correction)  
Zero Point Energy (au) 1.0426673  
Chemical potential (kJ mol<sup>-1</sup>) 2431.54  
Dispersion correction (au) PBE0/def2-TZVPP -0.25518875

xyz coordinates

134

|    |          |          |          |
|----|----------|----------|----------|
| C  | -1.83907 | 0.35840  | 0.06354  |
| C  | -1.02292 | 1.48394  | 0.12816  |
| Ru | 0.45139  | 0.00637  | 0.06331  |
| P  | 0.66209  | -0.34559 | 2.41914  |
| P  | 2.28421  | 1.22658  | 0.79181  |
| P  | 1.74296  | -1.89761 | -0.75443 |
| P  | 0.62334  | 0.15808  | -2.30456 |
| C  | 2.38778  | 0.39480  | 2.47269  |
| C  | 1.94147  | -1.15486 | -2.47818 |
| C  | 0.79444  | -2.02866 | 3.17910  |
| C  | 0.01289  | -3.07534 | 2.64697  |
| C  | 0.05879  | -4.35834 | 3.22000  |
| C  | 0.89083  | -4.60741 | 4.32414  |
| C  | 1.67659  | -3.56917 | 4.85748  |
| C  | 1.62725  | -2.28482 | 4.29138  |
| C  | -0.31838 | 0.55727  | 3.71149  |
| C  | -1.69264 | 0.79465  | 3.49182  |
| C  | -2.47201 | 1.42199  | 4.47961  |
| C  | -1.88974 | 1.81903  | 5.69419  |
| C  | -0.52139 | 1.58638  | 5.92123  |
| C  | 0.25976  | 0.95872  | 4.93777  |
| C  | 2.14121  | 3.03859  | 1.19281  |
| C  | 1.27400  | 3.45734  | 2.22757  |
| C  | 1.16634  | 4.81683  | 2.56289  |
| C  | 1.90555  | 5.78180  | 1.85716  |
| C  | 2.75539  | 5.37676  | 0.81458  |
| C  | 2.87730  | 4.01531  | 0.48556  |
| C  | 4.00105  | 1.15365  | 0.09395  |
| C  | 5.11736  | 0.92793  | 0.92887  |
| C  | 6.41874  | 0.94811  | 0.40018  |
| C  | 6.62554  | 1.20451  | -0.96585 |
| C  | 5.52216  | 1.44115  | -1.80287 |
| C  | 4.21846  | 1.41281  | -1.27777 |
| C  | 1.00206  | -3.56825 | -1.10509 |
| C  | -0.39505 | -3.72537 | -1.02549 |
| C  | -0.99443 | -4.95936 | -1.33285 |
| C  | -0.19817 | -6.05056 | -1.71858 |
| C  | 1.19837  | -5.90214 | -1.79947 |
| C  | 1.79860  | -4.66966 | -1.49366 |
| C  | 3.45121  | -2.38624 | -0.21846 |
| C  | 3.59529  | -2.95999 | 1.06672  |

|   |          |          |          |
|---|----------|----------|----------|
| C | 4.85318  | -3.38746 | 1.52178  |
| C | 5.98672  | -3.24977 | 0.70147  |
| C | 5.85231  | -2.68550 | -0.57736 |
| C | 4.59381  | -2.25683 | -1.03579 |
| C | -0.83367 | -0.38223 | -3.30770 |
| C | -0.94337 | -1.65554 | -3.90500 |
| C | -2.07365 | -1.98128 | -4.67668 |
| C | -3.10700 | -1.04570 | -4.85042 |
| C | -3.01319 | 0.21849  | -4.23953 |
| C | -1.88630 | 0.54910  | -3.47158 |
| C | 1.20130  | 1.61251  | -3.29031 |
| C | 1.09513  | 2.91392  | -2.75819 |
| C | 1.50606  | 4.02329  | -3.51921 |
| C | 2.03329  | 3.83851  | -4.80790 |
| C | 2.14301  | 2.54113  | -5.34278 |
| C | 1.72217  | 1.43215  | -4.59221 |
| H | 2.64815  | 1.05380  | 3.32837  |
| H | 3.11842  | -0.44081 | 2.40761  |
| H | 1.87004  | -1.86512 | -3.32913 |
| H | 2.91384  | -0.62158 | -2.53823 |
| H | -0.62582 | -2.88922 | 1.76873  |
| H | -0.55481 | -5.16797 | 2.79294  |
| H | 0.93026  | -5.61411 | 4.77145  |
| H | 2.33148  | -3.75997 | 5.72363  |
| H | 2.24846  | -1.48280 | 4.72358  |
| H | -2.15727 | 0.49353  | 2.54060  |
| H | -3.54201 | 1.60665  | 4.29088  |
| H | -2.50142 | 2.31279  | 6.46698  |
| H | -0.05704 | 1.89382  | 6.87267  |
| H | 1.32962  | 0.78617  | 5.14065  |
| H | 0.66602  | 2.72490  | 2.78135  |
| H | 0.49315  | 5.12016  | 3.38111  |
| H | 1.82168  | 6.84857  | 2.12205  |
| H | 3.34455  | 6.12379  | 0.25755  |
| H | 3.57003  | 3.71995  | -0.31730 |
| H | 4.98528  | 0.74464  | 2.00688  |
| H | 7.27838  | 0.76841  | 1.06627  |
| H | 7.64832  | 1.22716  | -1.37638 |
| H | 5.67292  | 1.65643  | -2.87349 |
| H | 3.36624  | 1.62422  | -1.94328 |
| H | -1.01927 | -2.86958 | -0.72231 |
| H | -2.08958 | -5.06189 | -1.26310 |
| H | -0.66408 | -7.02194 | -1.95299 |
| H | 1.82911  | -6.75566 | -2.09832 |
| H | 2.89472  | -4.57176 | -1.55212 |
| H | 2.71306  | -3.09558 | 1.71338  |
| H | 4.94409  | -3.83948 | 2.52311  |
| H | 6.97354  | -3.58902 | 1.05676  |
| H | 6.73261  | -2.58095 | -1.23235 |
| H | 4.51933  | -1.82781 | -2.04703 |
| H | -0.15212 | -2.41055 | -3.77896 |
| H | -2.13900 | -2.97526 | -5.14892 |
| H | -3.98661 | -1.29946 | -5.46464 |
| H | -3.82109 | 0.95760  | -4.36600 |
| H | -1.82209 | 1.54638  | -3.00552 |
| H | 0.68575  | 3.05648  | -1.74600 |

|   |          |          |          |
|---|----------|----------|----------|
| H | 1.41252  | 5.03789  | -3.09896 |
| H | 2.35714  | 4.70830  | -5.40275 |
| H | 2.55077  | 2.39318  | -6.35632 |
| H | 1.79280  | 0.42177  | -5.02966 |
| C | -2.39402 | -0.77026 | 0.04919  |
| C | -3.26974 | -1.89275 | 0.05026  |
| C | -1.27602 | 2.82549  | 0.14494  |
| H | -0.40307 | 3.49711  | 0.22445  |
| C | -2.56433 | 3.52254  | 0.09436  |
| C | -5.12476 | -4.05368 | 0.06976  |
| C | -4.51571 | -3.61796 | 1.27442  |
| C | -3.60946 | -2.56168 | 1.26517  |
| C | -3.88019 | -2.34711 | -1.15028 |
| C | -4.79476 | -3.40772 | -1.14608 |
| O | -5.99855 | -5.07951 | 0.18678  |
| H | -4.78909 | -4.12794 | 2.21122  |
| H | -3.15816 | -2.22344 | 2.21110  |
| H | -3.63399 | -1.84635 | -2.09961 |
| H | -5.25478 | -3.71914 | -2.09527 |
| C | -5.00422 | 5.00875  | 0.00568  |
| C | -3.76688 | 5.67998  | 0.12174  |
| C | -2.57724 | 4.93826  | 0.16378  |
| C | -3.82414 | 2.87047  | -0.02352 |
| C | -5.01452 | 3.59304  | -0.06664 |
| O | -6.21790 | 5.61655  | -0.04541 |
| H | -3.71923 | 6.77735  | 0.17994  |
| H | -1.61846 | 5.47660  | 0.25682  |
| H | -3.86610 | 1.77167  | -0.08626 |
| H | -5.98763 | 3.08519  | -0.15870 |
| C | -6.28086 | 7.03349  | 0.02002  |
| C | -6.67683 | -5.55518 | -0.97036 |
| H | -7.35592 | 7.29594  | -0.03928 |
| H | -5.74107 | 7.50871  | -0.83258 |
| H | -5.86287 | 7.41963  | 0.97936  |
| H | -7.29780 | -4.75550 | -1.43614 |
| H | -7.33720 | -6.37308 | -0.62106 |
| H | -5.96298 | -5.95798 | -1.72603 |

\$vibrational spectrum

| # mode | symmetry | wave number | IR intensity | selection |     |
|--------|----------|-------------|--------------|-----------|-----|
| rules  |          | cm** (-1)   | km/mol       | IR        |     |
| #      |          |             |              |           |     |
| RAMAN  |          |             |              |           |     |
| 1      |          | 0.00        | 0.00000      | -         | -   |
| 2      |          | 0.00        | 0.00000      | -         | -   |
| 3      |          | 0.00        | 0.00000      | -         | -   |
| 4      |          | 0.00        | 0.00000      | -         | -   |
| 5      |          | 0.00        | 0.00000      | -         | -   |
| 6      |          | 0.00        | 0.00000      | -         | -   |
| 7      | a        | 11.99       | 0.02671      | YES       | YES |
| 8      | a        | 13.30       | 0.01887      | YES       | YES |
| 9      | a        | 17.56       | 0.13565      | YES       | YES |
| 10     | a        | 18.81       | 0.31015      | YES       | YES |
| 11     | a        | 20.99       | 0.24407      | YES       | YES |
| 12     | a        | 23.61       | 0.00781      | YES       | YES |
| 13     | a        | 26.76       | 0.18448      | YES       | YES |



|    |   |        |         |     |     |
|----|---|--------|---------|-----|-----|
| 14 | a | 28.39  | 0.02314 | YES | YES |
| 15 | a | 31.02  | 0.17419 | YES | YES |
| 16 | a | 31.74  | 0.16701 | YES | YES |
| 17 | a | 34.91  | 0.17160 | YES | YES |
| 18 | a | 35.84  | 0.38417 | YES | YES |
| 19 | a | 38.39  | 0.07563 | YES | YES |
| 20 | a | 39.92  | 0.01966 | YES | YES |
| 21 | a | 41.70  | 0.06019 | YES | YES |
| 22 | a | 42.12  | 0.23058 | YES | YES |
| 23 | a | 44.39  | 0.19210 | YES | YES |
| 24 | a | 47.83  | 0.10677 | YES | YES |
| 25 | a | 48.18  | 0.12651 | YES | YES |
| 26 | a | 50.80  | 0.20900 | YES | YES |
| 27 | a | 52.52  | 0.24425 | YES | YES |
| 28 | a | 55.92  | 0.19507 | YES | YES |
| 29 | a | 58.74  | 0.01295 | YES | YES |
| 30 | a | 59.15  | 0.24746 | YES | YES |
| 31 | a | 64.26  | 0.26516 | YES | YES |
| 32 | a | 65.17  | 0.17178 | YES | YES |
| 33 | a | 68.53  | 0.19449 | YES | YES |
| 34 | a | 71.28  | 0.49184 | YES | YES |
| 35 | a | 75.28  | 0.22538 | YES | YES |
| 36 | a | 78.67  | 1.71051 | YES | YES |
| 37 | a | 82.74  | 0.37507 | YES | YES |
| 38 | a | 85.85  | 0.45923 | YES | YES |
| 39 | a | 94.85  | 0.62484 | YES | YES |
| 40 | a | 95.08  | 2.25595 | YES | YES |
| 41 | a | 100.39 | 0.07449 | YES | YES |
| 42 | a | 107.55 | 0.01191 | YES | YES |
| 43 | a | 120.85 | 1.77909 | YES | YES |
| 44 | a | 123.03 | 2.04306 | YES | YES |
| 45 | a | 129.45 | 2.74713 | YES | YES |
| 46 | a | 137.78 | 0.93783 | YES | YES |
| 47 | a | 152.37 | 0.20478 | YES | YES |
| 48 | a | 160.80 | 0.06300 | YES | YES |
| 49 | a | 164.91 | 0.44711 | YES | YES |
| 50 | a | 166.43 | 0.15861 | YES | YES |

## S7.26 Complex TS<sub>[D<sub>3h</sub>h<sup>+</sup>]-[4<sup>+</sup>η]</sub>

SCF Energy (au) (RI)BP86/SV(P) -4235.1980395000  
SCF Energy (au) PBE0/def2-TZVPP -4234.544643834  
SCF Energy (au) PBE0/def2-TZVPP -4234.5992187806 (CH<sub>2</sub>Cl<sub>2</sub>  
Correction)  
Zero Point Energy (au) 1.0397846  
Chemical potential (kJ mol<sup>-1</sup>) 2417.55  
Dispersion correction (au) PBE0/def2-TZVPP -0.25264172

xyz coordinates

134

|    |          |          |          |
|----|----------|----------|----------|
| C  | -1.14013 | 0.09847  | -0.77042 |
| C  | -0.21008 | 1.36577  | 0.78944  |
| Ru | 0.54120  | -0.30249 | 0.33002  |
| P  | -0.71063 | -1.61607 | 1.88953  |
| P  | 1.97676  | -0.85131 | 2.20664  |
| P  | 1.50763  | -2.12075 | -1.10996 |
| P  | 2.08307  | 0.65311  | -1.21971 |
| C  | 0.78667  | -2.13567 | 2.89738  |
| C  | 2.86158  | -0.96829 | -1.73628 |
| C  | -1.57311 | -3.16683 | 1.38190  |
| C  | -2.05261 | -3.28878 | 0.06069  |
| C  | -2.73937 | -4.45191 | -0.33162 |
| C  | -2.94464 | -5.49558 | 0.58613  |
| C  | -2.46834 | -5.37618 | 1.90518  |
| C  | -1.78952 | -4.21438 | 2.30562  |
| C  | -1.92367 | -0.84253 | 3.04495  |
| C  | -2.87072 | 0.04938  | 2.49309  |
| C  | -3.86057 | 0.62049  | 3.31018  |
| C  | -3.91211 | 0.31181  | 4.68028  |
| C  | -2.97036 | -0.57253 | 5.23485  |
| C  | -1.97992 | -1.14930 | 4.42241  |
| C  | 2.14585  | 0.39777  | 3.57494  |
| C  | 0.99360  | 1.08516  | 4.02004  |
| C  | 1.07932  | 2.01472  | 5.06951  |
| C  | 2.31846  | 2.28727  | 5.67545  |
| C  | 3.46876  | 1.61529  | 5.23213  |
| C  | 3.38582  | 0.67172  | 4.19251  |
| C  | 3.64689  | -1.64352 | 2.19154  |
| C  | 3.92384  | -2.82871 | 2.90567  |
| C  | 5.22273  | -3.36527 | 2.91570  |
| C  | 6.26099  | -2.72162 | 2.22158  |
| C  | 5.99615  | -1.53594 | 1.51456  |
| C  | 4.69701  | -1.00092 | 1.49594  |
| C  | 0.68550  | -2.73032 | -2.65811 |
| C  | -0.23258 | -1.89050 | -3.32745 |
| C  | -0.83264 | -2.31177 | -4.52638 |
| C  | -0.53151 | -3.57363 | -5.06615 |
| C  | 0.37640  | -4.41561 | -4.40158 |
| C  | 0.98299  | -4.00007 | -3.20436 |
| C  | 2.37282  | -3.64121 | -0.50824 |
| C  | 1.60610  | -4.60906 | 0.18204  |

|   |          |          |          |
|---|----------|----------|----------|
| C | 2.19465  | -5.80925 | 0.61383  |
| C | 3.55601  | -6.05791 | 0.36602  |
| C | 4.32361  | -5.10254 | -0.32056 |
| C | 3.73672  | -3.90230 | -0.75812 |
| C | 1.46713  | 1.50201  | -2.73730 |
| C | 1.68423  | 1.03016  | -4.04835 |
| C | 1.21410  | 1.76463  | -5.15192 |
| C | 0.52379  | 2.97188  | -4.95620 |
| C | 0.29528  | 3.44211  | -3.64999 |
| C | 0.75945  | 2.71108  | -2.54596 |
| C | 3.46749  | 1.76142  | -0.70208 |
| C | 3.38384  | 2.46391  | 0.51788  |
| C | 4.42181  | 3.32961  | 0.90699  |
| C | 5.55022  | 3.49022  | 0.08612  |
| C | 5.63883  | 2.79083  | -1.13221 |
| C | 4.59933  | 1.93599  | -1.53088 |
| H | 0.69235  | -2.15303 | 4.00368  |
| H | 1.09867  | -3.14076 | 2.53844  |
| H | 3.14942  | -1.09752 | -2.80068 |
| H | 3.76371  | -1.10124 | -1.10120 |
| H | -1.89012 | -2.46841 | -0.65781 |
| H | -3.11259 | -4.54024 | -1.36471 |
| H | -3.48134 | -6.40711 | 0.27575  |
| H | -2.63301 | -6.19085 | 2.62950  |
| H | -1.43421 | -4.12691 | 3.34639  |
| H | -2.82931 | 0.29915  | 1.42023  |
| H | -4.59188 | 1.31732  | 2.86978  |
| H | -4.68815 | 0.76279  | 5.32029  |
| H | -3.00555 | -0.81833 | 6.30889  |
| H | -1.25299 | -1.84040 | 4.87957  |
| H | 0.01417  | 0.89276  | 3.55373  |
| H | 0.16730  | 2.52946  | 5.41357  |
| H | 2.38582  | 3.02133  | 6.49497  |
| H | 4.44495  | 1.81749  | 5.70277  |
| H | 4.29770  | 0.14601  | 3.87135  |
| H | 3.13090  | -3.34256 | 3.47181  |
| H | 5.42384  | -4.29139 | 3.47841  |
| H | 7.28017  | -3.14127 | 2.23722  |
| H | 6.80663  | -1.01742 | 0.97655  |
| H | 4.50832  | -0.05640 | 0.95890  |
| H | -0.49611 | -0.91001 | -2.90175 |
| H | -1.55000 | -1.64646 | -5.03383 |
| H | -1.00808 | -3.90427 | -6.00373 |
| H | 0.61734  | -5.40859 | -4.81563 |
| H | 1.69042  | -4.67470 | -2.69808 |
| H | 0.53164  | -4.43764 | 0.36156  |
| H | 1.58055  | -6.55764 | 1.14110  |
| H | 4.01733  | -7.00102 | 0.70199  |
| H | 5.38936  | -5.29304 | -0.52723 |
| H | 4.35704  | -3.17834 | -1.30962 |
| H | 2.21829  | 0.08474  | -4.23073 |
| H | 1.39453  | 1.38730  | -6.17183 |
| H | 0.16350  | 3.54920  | -5.82351 |
| H | -0.24942 | 4.38603  | -3.48546 |
| H | 0.57118  | 3.08827  | -1.52712 |
| H | 2.50104  | 2.33165  | 1.16348  |

|   |          |          |          |
|---|----------|----------|----------|
| H | 4.34585  | 3.87925  | 1.85917  |
| H | 6.36451  | 4.16716  | 0.39255  |
| H | 6.52048  | 2.91997  | -1.78133 |
| H | 4.66890  | 1.41070  | -2.49856 |
| C | -2.20354 | 0.31441  | -1.38766 |
| C | -3.39462 | 0.54178  | -2.14025 |
| C | -0.61296 | 2.57569  | 1.18039  |
| H | 0.01457  | 2.84641  | 2.06363  |
| C | -1.60517 | 3.59611  | 0.81557  |
| C | -5.77653 | 1.05333  | -3.62322 |
| C | -5.82094 | 0.29076  | -2.42977 |
| C | -4.65758 | 0.04212  | -1.70526 |
| C | -3.36650 | 1.29214  | -3.34633 |
| C | -4.53321 | 1.54856  | -4.08009 |
| O | -6.96566 | 1.25278  | -4.24601 |
| H | -6.79736 | -0.09013 | -2.09156 |
| H | -4.70976 | -0.54761 | -0.77619 |
| H | -2.40289 | 1.68693  | -3.70712 |
| H | -4.46443 | 2.13807  | -5.00621 |
| C | -3.51072 | 5.63582  | 0.22646  |
| C | -2.73405 | 5.70650  | 1.40418  |
| C | -1.79835 | 4.69845  | 1.68225  |
| C | -2.38529 | 3.55018  | -0.36895 |
| C | -3.31877 | 4.54582  | -0.65643 |
| O | -4.44802 | 6.54820  | -0.14386 |
| H | -2.84889 | 6.54041  | 2.11215  |
| H | -1.20299 | 4.76992  | 2.60848  |
| H | -2.25312 | 2.71400  | -1.06945 |
| H | -3.92686 | 4.50141  | -1.57340 |
| C | -4.69612 | 7.66012  | 0.70263  |
| C | -7.00361 | 2.04100  | -5.42721 |
| H | -5.49255 | 8.25094  | 0.20784  |
| H | -3.78876 | 8.29844  | 0.82159  |
| H | -5.05226 | 7.33903  | 1.70976  |
| H | -6.63868 | 3.07830  | -5.23932 |
| H | -8.06784 | 2.08031  | -5.73457 |
| H | -6.40381 | 1.58268  | -6.24779 |

\$vibrational spectrum

| # mode | symmetry | wave number | IR intensity | selection |     |
|--------|----------|-------------|--------------|-----------|-----|
| rules  |          | cm**(-1)    | km/mol       | IR        |     |
| RAMAN  |          |             |              |           |     |
| 1      | a        | -149.87     | 0.00000      | YES       | YES |
| 2      |          | 0.00        | 0.00000      | -         | -   |
| 3      |          | 0.00        | 0.00000      | -         | -   |
| 4      |          | 0.00        | 0.00000      | -         | -   |
| 5      |          | 0.00        | 0.00000      | -         | -   |
| 6      |          | 0.00        | 0.00000      | -         | -   |
| 7      |          | 0.00        | 0.00000      | -         | -   |
| 8      | a        | 3.63        | 0.17476      | YES       | YES |
| 9      | a        | 8.74        | 0.00806      | YES       | YES |
| 10     | a        | 12.06       | 0.18188      | YES       | YES |
| 11     | a        | 14.24       | 0.21666      | YES       | YES |
| 12     | a        | 15.09       | 0.08326      | YES       | YES |
| 13     | a        | 20.87       | 0.16124      | YES       | YES |

|    |   |        |          |     |     |
|----|---|--------|----------|-----|-----|
| 14 | a | 23.84  | 0.04666  | YES | YES |
| 15 | a | 26.48  | 0.29430  | YES | YES |
| 16 | a | 30.29  | 0.12252  | YES | YES |
| 17 | a | 33.74  | 0.15307  | YES | YES |
| 18 | a | 34.95  | 0.08609  | YES | YES |
| 19 | a | 35.16  | 0.15717  | YES | YES |
| 20 | a | 37.44  | 0.20585  | YES | YES |
| 21 | a | 39.25  | 0.09763  | YES | YES |
| 22 | a | 40.85  | 0.13073  | YES | YES |
| 23 | a | 42.68  | 0.10680  | YES | YES |
| 24 | a | 44.28  | 0.28358  | YES | YES |
| 25 | a | 46.09  | 0.13618  | YES | YES |
| 26 | a | 47.06  | 0.09210  | YES | YES |
| 27 | a | 50.68  | 0.04583  | YES | YES |
| 28 | a | 52.50  | 0.04115  | YES | YES |
| 29 | a | 55.97  | 0.63864  | YES | YES |
| 30 | a | 57.29  | 1.19004  | YES | YES |
| 31 | a | 59.78  | 0.05053  | YES | YES |
| 32 | a | 61.85  | 0.01575  | YES | YES |
| 33 | a | 65.92  | 0.45100  | YES | YES |
| 34 | a | 70.06  | 0.26188  | YES | YES |
| 35 | a | 73.40  | 0.69525  | YES | YES |
| 36 | a | 78.00  | 2.00640  | YES | YES |
| 37 | a | 80.07  | 0.53546  | YES | YES |
| 38 | a | 83.11  | 0.45152  | YES | YES |
| 39 | a | 88.44  | 3.67964  | YES | YES |
| 40 | a | 96.57  | 1.06642  | YES | YES |
| 41 | a | 98.28  | 1.64111  | YES | YES |
| 42 | a | 104.15 | 4.20516  | YES | YES |
| 43 | a | 111.05 | 0.68385  | YES | YES |
| 44 | a | 116.25 | 2.29829  | YES | YES |
| 45 | a | 123.20 | 5.01345  | YES | YES |
| 46 | a | 137.33 | 5.49657  | YES | YES |
| 47 | a | 143.25 | 0.09247  | YES | YES |
| 48 | a | 152.94 | 0.60566  | YES | YES |
| 49 | a | 154.90 | 24.59411 | YES | YES |
| 50 | a | 162.44 | 0.03988  | YES | YES |

## S7.27 Proton sponge

SCF Energy (au) (RI)BP86/SV(P) -653.3309117434  
SCF Energy (au) PBE0/def2-TZVPP -653.2525919652  
SCF Energy (au) PBE0/def2-TZVPP -653.2597464086 (CH<sub>2</sub>Cl<sub>2</sub>  
Correction)  
Zero Point Energy (au) 0.2845876  
Chemical potential (kJ mol<sup>-1</sup>) 639.28  
Dispersion correction (au) PBE0/def2-TZVPP -0.03935925

xyz coordinates

34

|   |          |          |          |
|---|----------|----------|----------|
| C | -1.19098 | 0.53183  | -0.18474 |
| C | -2.43133 | 0.68416  | -0.82711 |
| C | -0.43033 | -0.69353 | -0.40094 |
| C | 0.96434  | -0.89962 | -0.02803 |
| C | 1.48791  | -2.20346 | -0.05031 |
| C | 0.73824  | -3.30123 | -0.53515 |
| C | -0.52065 | -3.09628 | -1.07394 |
| C | -1.11878 | -1.80004 | -1.04044 |
| C | -2.39914 | -1.60018 | -1.63992 |
| H | -1.08323 | -3.92639 | -1.53231 |
| H | 1.19436  | -4.30560 | -0.54247 |
| H | 2.53396  | -2.37333 | 0.24371  |
| C | -3.01540 | -0.36165 | -1.58046 |
| H | -2.88092 | -2.44939 | -2.15198 |
| H | -3.99589 | -0.20023 | -2.05935 |
| H | -3.00640 | 1.61042  | -0.68395 |
| N | -0.70963 | 1.54633  | 0.67079  |
| N | 1.79035  | 0.18672  | 0.33088  |
| C | -0.40969 | 1.18631  | 2.05222  |
| C | -1.25866 | 2.88184  | 0.54868  |
| C | 1.93567  | 1.27974  | -0.62414 |
| C | 3.00938  | -0.07548 | 1.06934  |
| H | -1.30290 | 3.18716  | -0.51832 |
| H | -0.59228 | 3.59474  | 1.08441  |
| H | -2.28641 | 2.99460  | 0.99005  |
| H | 2.09475  | 2.24661  | -0.09446 |
| H | 1.02948  | 1.37327  | -1.25050 |
| H | 2.81121  | 1.10643  | -1.30481 |
| H | 3.38168  | 0.88116  | 1.50039  |
| H | 3.84000  | -0.50106 | 0.44254  |
| H | 2.81189  | -0.77698 | 1.90738  |
| H | -1.30969 | 1.32017  | 2.70983  |
| H | 0.41077  | 1.82327  | 2.45415  |
| H | -0.09167 | 0.12965  | 2.11893  |

\$vibrational spectrum

| # mode | symmetry | wave number           | IR intensity | selection |
|--------|----------|-----------------------|--------------|-----------|
| rules  |          | cm <sup>**</sup> (-1) | km/mol       | IR        |
| #      |          |                       |              |           |
| RAMAN  |          |                       |              |           |
| 1      |          | 0.00                  | 0.00000      | - -       |

|    |   |         |          |     |     |
|----|---|---------|----------|-----|-----|
| 2  |   | 0.00    | 0.00000  | -   | -   |
| 3  |   | 0.00    | 0.00000  | -   | -   |
| 4  |   | 0.00    | 0.00000  | -   | -   |
| 5  |   | 0.00    | 0.00000  | -   | -   |
| 6  |   | 0.00    | 0.00000  | -   | -   |
| 7  | a | 56.65   | 0.75068  | YES | YES |
| 8  | a | 95.96   | 1.88692  | YES | YES |
| 9  | a | 106.49  | 3.46773  | YES | YES |
| 10 | a | 116.44  | 0.37149  | YES | YES |
| 11 | a | 122.24  | 1.01804  | YES | YES |
| 12 | a | 142.95  | 0.35398  | YES | YES |
| 13 | a | 171.79  | 0.79922  | YES | YES |
| 14 | a | 208.02  | 0.07219  | YES | YES |
| 15 | a | 233.79  | 0.40761  | YES | YES |
| 16 | a | 258.99  | 4.16322  | YES | YES |
| 17 | a | 287.71  | 1.27664  | YES | YES |
| 18 | a | 300.14  | 1.52157  | YES | YES |
| 19 | a | 303.53  | 7.51256  | YES | YES |
| 20 | a | 326.67  | 0.22660  | YES | YES |
| 21 | a | 344.70  | 1.30912  | YES | YES |
| 22 | a | 354.84  | 2.60517  | YES | YES |
| 23 | a | 375.38  | 1.69839  | YES | YES |
| 24 | a | 434.14  | 1.27962  | YES | YES |
| 25 | a | 464.48  | 5.09684  | YES | YES |
| 26 | a | 476.91  | 2.65129  | YES | YES |
| 27 | a | 520.66  | 4.59137  | YES | YES |
| 28 | a | 521.81  | 2.55716  | YES | YES |
| 29 | a | 527.79  | 0.09692  | YES | YES |
| 30 | a | 534.06  | 1.63894  | YES | YES |
| 31 | a | 619.37  | 1.34967  | YES | YES |
| 32 | a | 641.61  | 8.37534  | YES | YES |
| 33 | a | 663.05  | 7.50533  | YES | YES |
| 34 | a | 747.34  | 0.46734  | YES | YES |
| 35 | a | 754.41  | 8.70185  | YES | YES |
| 36 | a | 757.41  | 56.90380 | YES | YES |
| 37 | a | 769.82  | 2.52115  | YES | YES |
| 38 | a | 835.61  | 12.51615 | YES | YES |
| 39 | a | 845.80  | 0.45021  | YES | YES |
| 40 | a | 866.55  | 4.22332  | YES | YES |
| 41 | a | 894.69  | 3.68403  | YES | YES |
| 42 | a | 940.69  | 30.24377 | YES | YES |
| 43 | a | 944.00  | 0.81855  | YES | YES |
| 44 | a | 952.02  | 0.88688  | YES | YES |
| 45 | a | 1029.30 | 96.79414 | YES | YES |
| 46 | a | 1036.39 | 30.68533 | YES | YES |
| 47 | a | 1051.75 | 5.60632  | YES | YES |
| 48 | a | 1057.74 | 7.86744  | YES | YES |
| 49 | a | 1080.56 | 12.56245 | YES | YES |
| 50 | a | 1083.60 | 3.51040  | YES | YES |

## S7.28[HProton sponge]<sup>+</sup>

SCF Energy (au) (RI)BP86/SV(P) -653.7298291209  
SCF Energy (au) PBE0/def2-TZVPP -653.6546459553  
SCF Energy (au) PBE0/def2-TZVPP -653.7122924463 (CH<sub>2</sub>Cl<sub>2</sub>  
Correction)  
Zero Point Energy (au) 0.2956309  
Chemical potential (kJ mol<sup>-1</sup>) 668.18  
Dispersion correction (au) PBE0/def2-TZVPP -0.04071040

xyz coordinates

35

|   |          |          |          |
|---|----------|----------|----------|
| C | -1.27799 | 0.31178  | 0.06919  |
| C | -2.66241 | 0.28108  | -0.04830 |
| C | -0.46650 | -0.76409 | -0.43187 |
| C | 0.96715  | -0.82075 | -0.35632 |
| C | 1.68159  | -1.89765 | -0.86427 |
| C | 1.00586  | -2.98296 | -1.47904 |
| C | -0.37738 | -2.97021 | -1.57446 |
| C | -1.14315 | -1.88003 | -1.06306 |
| C | -2.56647 | -1.87336 | -1.16424 |
| H | -0.90884 | -3.80981 | -2.05093 |
| H | 1.58709  | -3.82943 | -1.87686 |
| H | 2.78107  | -1.91899 | -0.79481 |
| C | -3.31385 | -0.81623 | -0.66821 |
| H | -3.06477 | -2.72943 | -1.64706 |
| H | -4.41192 | -0.81996 | -0.75101 |
| H | -3.26843 | 1.11470  | 0.34147  |
| N | -0.59950 | 1.45146  | 0.71265  |
| N | 1.66982  | 0.31336  | 0.28383  |
| C | -0.93897 | 1.59105  | 2.15386  |
| C | -0.78473 | 2.72921  | -0.02508 |
| C | 2.54960  | 1.06195  | -0.65959 |
| C | 2.38978  | -0.07397 | 1.53071  |
| H | -0.50600 | 2.58647  | -1.08868 |
| H | -0.13430 | 3.50777  | 0.42670  |
| H | -1.84076 | 3.07733  | 0.02221  |
| H | 2.92705  | 1.97548  | -0.15466 |
| H | 1.96499  | 1.34639  | -1.55718 |
| H | 3.41431  | 0.43932  | -0.97459 |
| H | 2.76780  | 0.84269  | 2.02966  |
| H | 3.24780  | -0.74163 | 1.30251  |
| H | 1.69061  | -0.60577 | 2.20662  |
| H | -2.00128 | 1.89082  | 2.29427  |
| H | -0.28795 | 2.36812  | 2.60726  |
| H | -0.77311 | 0.62333  | 2.66890  |
| H | 0.68380  | 1.02196  | 0.58040  |

\$vibrational spectrum

| #     | mode | symmetry | wave number           | IR intensity | selection |
|-------|------|----------|-----------------------|--------------|-----------|
| #     |      |          | cm <sup>**</sup> (-1) | km/mol       | IR        |
| RAMAN |      |          |                       |              |           |



|    |   |         |           |     |     |
|----|---|---------|-----------|-----|-----|
| 1  |   | 0.00    | 0.00000   | -   | -   |
| 2  |   | 0.00    | 0.00000   | -   | -   |
| 3  |   | 0.00    | 0.00000   | -   | -   |
| 4  |   | 0.00    | 0.00000   | -   | -   |
| 5  |   | 0.00    | 0.00000   | -   | -   |
| 6  |   | 0.00    | 0.00000   | -   | -   |
| 7  | a | 34.37   | 0.01558   | YES | YES |
| 8  | a | 103.23  | 0.58780   | YES | YES |
| 9  | a | 128.83  | 0.47567   | YES | YES |
| 10 | a | 155.64  | 178.20337 | YES | YES |
| 11 | a | 160.54  | 150.56855 | YES | YES |
| 12 | a | 176.14  | 3.66330   | YES | YES |
| 13 | a | 192.97  | 0.21471   | YES | YES |
| 14 | a | 218.46  | 0.40887   | YES | YES |
| 15 | a | 223.22  | 0.10700   | YES | YES |
| 16 | a | 235.70  | 0.17979   | YES | YES |
| 17 | a | 247.24  | 126.64666 | YES | YES |
| 18 | a | 262.93  | 9.98622   | YES | YES |
| 19 | a | 274.09  | 0.18349   | YES | YES |
| 20 | a | 306.35  | 298.06269 | YES | YES |
| 21 | a | 314.75  | 0.08619   | YES | YES |
| 22 | a | 335.71  | 808.52357 | YES | YES |
| 23 | a | 370.53  | 11.54635  | YES | YES |
| 24 | a | 439.80  | 9.31732   | YES | YES |
| 25 | a | 450.13  | 105.78460 | YES | YES |
| 26 | a | 469.98  | 0.79636   | YES | YES |
| 27 | a | 502.20  | 15.79133  | YES | YES |
| 28 | a | 523.59  | 7.68487   | YES | YES |
| 29 | a | 526.37  | 0.02396   | YES | YES |
| 30 | a | 549.63  | 11.91848  | YES | YES |
| 31 | a | 580.31  | 280.29650 | YES | YES |
| 32 | a | 633.72  | 0.23689   | YES | YES |
| 33 | a | 657.21  | 0.01022   | YES | YES |
| 34 | a | 717.68  | 71.64922  | YES | YES |
| 35 | a | 768.69  | 138.47574 | YES | YES |
| 36 | a | 769.89  | 0.43902   | YES | YES |
| 37 | a | 772.75  | 6.22060   | YES | YES |
| 38 | a | 776.94  | 66.60926  | YES | YES |
| 39 | a | 855.52  | 4.20483   | YES | YES |
| 40 | a | 885.08  | 17.73469  | YES | YES |
| 41 | a | 905.04  | 0.04216   | YES | YES |
| 42 | a | 913.49  | 17.17444  | YES | YES |
| 43 | a | 923.75  | 2.41372   | YES | YES |
| 44 | a | 978.22  | 0.00630   | YES | YES |
| 45 | a | 989.70  | 0.00229   | YES | YES |
| 46 | a | 999.59  | 31.21941  | YES | YES |
| 47 | a | 1001.32 | 16.37569  | YES | YES |
| 48 | a | 1007.64 | 15.29921  | YES | YES |
| 49 | a | 1025.75 | 103.65308 | YES | YES |
| 50 | a | 1056.64 | 0.52381   | YES | YES |

## S7.29 Pyridine

SCF Energy (au) (RI)BP86/SV(P) -248.1066297523  
SCF Energy (au) PBE0/def2-TZVPP -248.0746694250  
SCF Energy (au) PBE0/def2-TZVPP -248.0817570498 (CH<sub>2</sub>Cl<sub>2</sub>  
Correction)  
Zero Point Energy (au) 0.0862104  
Chemical potential (kJ mol<sup>-1</sup>) 154.10  
Dispersion correction (au) PBE0/def2-TZVPP -0.00841146

xyz coordinates

11

|   |          |          |          |
|---|----------|----------|----------|
| N | 1.07664  | 0.21029  | -1.19060 |
| C | 0.58344  | 1.25382  | -0.50176 |
| C | -0.35332 | 1.12930  | 0.54051  |
| C | -0.80080 | -0.15631 | 0.88513  |
| C | -0.29292 | -1.25536 | 0.17378  |
| C | 0.64024  | -1.01484 | -0.85125 |
| H | 0.95671  | 2.25306  | -0.79746 |
| H | -0.72214 | 2.02371  | 1.06935  |
| H | -1.53445 | -0.29978 | 1.69631  |
| H | -0.61253 | -2.28441 | 0.40709  |
| H | 1.05914  | -1.85947 | -1.43112 |

\$vibrational spectrum

| #     | mode | symmetry | wave number | IR intensity | selection |
|-------|------|----------|-------------|--------------|-----------|
| rules |      |          |             |              |           |
| #     |      |          | cm** (-1)   | km/mol       | IR        |
| RAMAN |      |          |             |              |           |
| 1     |      |          | 0.00        | 0.00000      | - -       |
| 2     |      |          | 0.00        | 0.00000      | - -       |
| 3     |      |          | 0.00        | 0.00000      | - -       |
| 4     |      |          | 0.00        | 0.00000      | - -       |
| 5     |      |          | 0.00        | 0.00000      | - -       |
| 6     |      |          | 0.00        | 0.00000      | - -       |
| 7     |      | a        | 361.91      | 0.00003      | YES YES   |
| 8     |      | a        | 407.02      | 2.95124      | YES YES   |
| 9     |      | a        | 590.49      | 4.11585      | YES YES   |
| 10    |      | a        | 649.86      | 0.36676      | YES YES   |
| 11    |      | a        | 695.42      | 50.99604     | YES YES   |
| 12    |      | a        | 743.57      | 4.37772      | YES YES   |
| 13    |      | a        | 870.11      | 0.00009      | YES YES   |
| 14    |      | a        | 923.22      | 0.01539      | YES YES   |
| 15    |      | a        | 964.42      | 0.00030      | YES YES   |
| 16    |      | a        | 981.28      | 9.00977      | YES YES   |
| 17    |      | a        | 984.79      | 0.00594      | YES YES   |
| 18    |      | a        | 1021.65     | 3.04290      | YES YES   |
| 19    |      | a        | 1049.67     | 0.00031      | YES YES   |
| 20    |      | a        | 1062.35     | 4.80612      | YES YES   |
| 21    |      | a        | 1129.82     | 1.34523      | YES YES   |
| 22    |      | a        | 1206.31     | 3.23261      | YES YES   |
| 23    |      | a        | 1325.59     | 0.84605      | YES YES   |
| 24    |      | a        | 1338.35     | 0.10751      | YES YES   |

|    |   |         |          |     |     |
|----|---|---------|----------|-----|-----|
| 25 | a | 1436.78 | 23.84228 | YES | YES |
| 26 | a | 1471.44 | 2.86106  | YES | YES |
| 27 | a | 1592.98 | 20.10630 | YES | YES |
| 28 | a | 1594.27 | 10.53416 | YES | YES |
| 29 | a | 3059.94 | 36.96739 | YES | YES |
| 30 | a | 3063.27 | 9.71276  | YES | YES |
| 31 | a | 3093.85 | 3.78534  | YES | YES |
| 32 | a | 3107.88 | 25.02201 | YES | YES |
| 33 | a | 3115.74 | 7.59709  | YES | YES |

### S7.30[Hpyridine]<sup>+</sup>

SCF Energy (au) (RI)BP86/SV(P) -248.4713768608  
SCF Energy (au) PBE0/def2-TZVPP -248.4444248666  
SCF Energy (au) PBE0/def2-TZVPP -248.5220537530 (CH<sub>2</sub>Cl<sub>2</sub>  
Correction)  
Zero Point Energy (au) 0.0999681  
Chemical potential (kJ mol<sup>-1</sup>) 189.99  
Dispersion correction (au) PBE0/def2-TZVPP -0.00900921

xyz coordinates

12

|   |          |          |          |
|---|----------|----------|----------|
| N | 0.89280  | 0.17525  | -0.98532 |
| C | 0.43271  | 1.27304  | -0.32821 |
| C | -0.49625 | 1.11288  | 0.69939  |
| C | -0.93444 | -0.18336 | 1.03082  |
| C | -0.43424 | -1.29539 | 0.32704  |
| C | 0.49358  | -1.09127 | -0.69380 |
| H | 0.82847  | 2.24755  | -0.65221 |
| H | -0.87026 | 2.00014  | 1.23280  |
| H | -1.66840 | -0.32759 | 1.84041  |
| H | -0.75885 | -2.31988 | 0.56503  |
| H | 0.93544  | -1.90163 | -1.29328 |
| H | 1.57943  | 0.31026  | -1.74268 |

\$vibrational spectrum

| #     | mode | symmetry | wave number           | IR intensity | selection |
|-------|------|----------|-----------------------|--------------|-----------|
| rules |      |          |                       |              |           |
| #     |      |          | cm <sup>**</sup> (-1) | km/mol       | IR        |
| RAMAN |      |          |                       |              |           |
| 1     |      |          | 0.00                  | 0.00000      | - -       |
| 2     |      |          | 0.00                  | 0.00000      | - -       |
| 3     |      |          | 0.00                  | 0.00000      | - -       |
| 4     |      |          | 0.00                  | 0.00000      | - -       |
| 5     |      |          | 0.00                  | 0.00000      | - -       |
| 6     |      |          | 0.00                  | 0.00000      | - -       |
| 7     |      | a        | 379.71                | 0.97251      | YES YES   |
| 8     |      | a        | 392.46                | 0.00006      | YES YES   |
| 9     |      | a        | 601.74                | 0.01395      | YES YES   |
| 10    |      | a        | 625.26                | 0.13623      | YES YES   |
| 11    |      | a        | 661.56                | 96.95914     | YES YES   |
| 12    |      | a        | 725.49                | 62.95160     | YES YES   |
| 13    |      | a        | 834.39                | 10.81840     | YES YES   |
| 14    |      | a        | 846.20                | 0.00002      | YES YES   |
| 15    |      | a        | 954.98                | 2.59017      | YES YES   |
| 16    |      | a        | 970.82                | 0.00016      | YES YES   |
| 17    |      | a        | 999.53                | 3.13975      | YES YES   |
| 18    |      | a        | 1016.83               | 0.45173      | YES YES   |
| 19    |      | a        | 1017.04               | 0.06264      | YES YES   |
| 20    |      | a        | 1049.39               | 4.44995      | YES YES   |
| 21    |      | a        | 1056.00               | 5.27538      | YES YES   |
| 22    |      | a        | 1152.92               | 1.12395      | YES YES   |
| 23    |      | a        | 1183.07               | 1.04674      | YES YES   |

|    |   |         |           |     |     |
|----|---|---------|-----------|-----|-----|
| 24 | a | 1269.02 | 0.08873   | YES | YES |
| 25 | a | 1349.76 | 1.24634   | YES | YES |
| 26 | a | 1391.24 | 9.58071   | YES | YES |
| 27 | a | 1473.55 | 19.91942  | YES | YES |
| 28 | a | 1534.35 | 45.90459  | YES | YES |
| 29 | a | 1612.92 | 23.14023  | YES | YES |
| 30 | a | 1636.56 | 27.31715  | YES | YES |
| 31 | a | 3131.83 | 0.56118   | YES | YES |
| 32 | a | 3146.52 | 2.76912   | YES | YES |
| 33 | a | 3148.08 | 13.64381  | YES | YES |
| 34 | a | 3159.25 | 25.24800  | YES | YES |
| 35 | a | 3160.51 | 0.95182   | YES | YES |
| 36 | a | 3399.94 | 152.11996 | YES | YES |

### S7.31(MeOH)<sub>4</sub>

SCF Energy (au) (RI)BP86/SV(P) -462.5583485669  
SCF Energy (au) PBE0/def2-TZVPP -462.6005360868  
SCF Energy (au) PBE0/def2-TZVPP -462.6081871275 (CH<sub>2</sub>Cl<sub>2</sub>  
Correction)  
Zero Point Energy (au) 0.2058545  
Chemical potential (kJ mol<sup>-1</sup>) 423.66  
Dispersion correction (au) PBE0/def2-TZVPP -0.01271465

xyz coordinates

24

|   |          |          |          |
|---|----------|----------|----------|
| H | 0.69462  | 1.93326  | 2.13806  |
| C | 0.68224  | 2.55564  | 1.20913  |
| H | 1.67882  | 3.04992  | 1.11066  |
| H | -0.08283 | 3.35212  | 1.33554  |
| O | 0.35883  | 1.80851  | 0.04747  |
| H | 1.02320  | 1.02930  | -0.04311 |
| O | -0.36090 | -1.80726 | 0.04671  |
| H | 0.08259  | -3.35352 | 1.33097  |
| C | -0.68156 | -2.55555 | 1.20840  |
| H | -0.68965 | -1.93457 | 2.13832  |
| H | -1.67931 | -3.04799 | 1.11266  |
| O | 1.80681  | -0.35907 | -0.04825 |
| C | 2.55587  | -0.68230 | -1.20871 |
| H | 3.04987  | -1.67896 | -1.10961 |
| H | 1.93507  | -0.69436 | -2.13870 |
| H | 3.35267  | 0.08270  | -1.33355 |
| H | 1.02745  | -1.02352 | 0.04122  |
| O | -1.80906 | 0.36055  | -0.04602 |
| C | -2.55552 | 0.68153  | -1.20886 |
| H | -1.93299 | 0.68977  | -2.13772 |
| H | -3.35333 | -0.08255 | -1.33280 |
| H | -3.04801 | 1.67930  | -1.11362 |
| H | -1.02535 | -1.02780 | -0.04151 |
| H | -1.02952 | 1.02483  | 0.04330  |

\$vibrational spectrum

| #     | mode | symmetry | wave number | IR intensity | selection |
|-------|------|----------|-------------|--------------|-----------|
| rules |      |          |             |              |           |
| #     |      |          | cm**(-1)    | km/mol       | IR        |
| RAMAN |      |          |             |              |           |
| 1     |      |          | 0.00        | 0.00000      | - -       |
| 2     |      |          | 0.00        | 0.00000      | - -       |
| 3     |      |          | 0.00        | 0.00000      | - -       |
| 4     |      |          | 0.00        | 0.00000      | - -       |
| 5     |      |          | 0.00        | 0.00000      | - -       |
| 6     |      |          | 0.00        | 0.00000      | - -       |
| 7     |      | a        | 29.35       | 0.00002      | YES YES   |
| 8     |      | a        | 48.73       | 0.51164      | YES YES   |
| 9     |      | a        | 74.42       | 5.90094      | YES YES   |
| 10    |      | a        | 74.48       | 5.90298      | YES YES   |
| 11    |      | a        | 82.12       | 0.00240      | YES YES   |

|    |   |         |           |     |     |
|----|---|---------|-----------|-----|-----|
| 12 | a | 91.69   | 0.00652   | YES | YES |
| 13 | a | 105.85  | 1.61481   | YES | YES |
| 14 | a | 105.96  | 1.60694   | YES | YES |
| 15 | a | 110.61  | 2.96789   | YES | YES |
| 16 | a | 117.55  | 0.23557   | YES | YES |
| 17 | a | 135.89  | 0.14289   | YES | YES |
| 18 | a | 136.39  | 8.46882   | YES | YES |
| 19 | a | 136.39  | 8.32329   | YES | YES |
| 20 | a | 165.70  | 0.00010   | YES | YES |
| 21 | a | 257.17  | 0.00010   | YES | YES |
| 22 | a | 338.43  | 58.23423  | YES | YES |
| 23 | a | 338.47  | 58.20314  | YES | YES |
| 24 | a | 347.43  | 6.52222   | YES | YES |
| 25 | a | 915.92  | 6.77407   | YES | YES |
| 26 | a | 1038.49 | 178.64670 | YES | YES |
| 27 | a | 1038.61 | 178.34815 | YES | YES |
| 28 | a | 1058.28 | 0.01169   | YES | YES |
| 29 | a | 1064.47 | 259.68936 | YES | YES |
| 30 | a | 1082.28 | 81.45276  | YES | YES |
| 31 | a | 1082.37 | 81.23976  | YES | YES |
| 32 | a | 1096.06 | 0.00184   | YES | YES |
| 33 | a | 1129.03 | 39.26083  | YES | YES |
| 34 | a | 1136.17 | 40.88916  | YES | YES |
| 35 | a | 1136.19 | 40.88476  | YES | YES |
| 36 | a | 1148.35 | 0.00005   | YES | YES |
| 37 | a | 1156.86 | 33.07660  | YES | YES |
| 38 | a | 1156.89 | 33.17810  | YES | YES |
| 39 | a | 1157.23 | 6.90137   | YES | YES |
| 40 | a | 1256.55 | 0.00261   | YES | YES |
| 41 | a | 1425.88 | 21.91580  | YES | YES |
| 42 | a | 1428.36 | 15.24609  | YES | YES |
| 43 | a | 1428.39 | 15.11610  | YES | YES |
| 44 | a | 1432.29 | 0.00002   | YES | YES |
| 45 | a | 1434.71 | 28.01388  | YES | YES |
| 46 | a | 1434.74 | 28.11472  | YES | YES |
| 47 | a | 1435.26 | 0.58493   | YES | YES |
| 48 | a | 1437.83 | 0.00198   | YES | YES |
| 49 | a | 1442.39 | 42.46358  | YES | YES |
| 50 | a | 1442.39 | 42.62973  | YES | YES |

### S7.32 [H(MeOH)<sub>4</sub>]<sup>+</sup>

SCF Energy (au) (RI)BP86/SV(P) -462.9201903133  
SCF Energy (au) PBE0/def2-TZVPP -462.9701893694  
SCF Energy (au) PBE0/def2-TZVPP -463.0317625936 (CH<sub>2</sub>Cl<sub>2</sub>  
Correction)  
Zero Point Energy (au) 0.2149554  
Chemical potential (kJ mol<sup>-1</sup>) 437.97  
Dispersion correction (au) PBE0/def2-TZVPP -0.01193877

xyz coordinates

25

|   |          |          |          |
|---|----------|----------|----------|
| H | 5.27259  | 0.08659  | 0.62411  |
| C | 4.31660  | -0.45897 | 0.46977  |
| H | 4.33383  | -1.42164 | 1.02744  |
| H | 4.19105  | -0.66531 | -0.61138 |
| O | 3.19810  | 0.36129  | 0.86217  |
| H | 3.24764  | 0.58397  | 1.81655  |
| H | 0.08433  | -0.22476 | -0.12646 |
| O | -0.88548 | -0.88268 | 0.23131  |
| H | -1.67569 | -1.71648 | -1.55303 |
| C | -1.20321 | -2.02133 | -0.59288 |
| H | -0.25796 | -2.55997 | -0.80249 |
| H | -1.88461 | -2.69587 | -0.03416 |
| O | 1.07095  | 0.34318  | -0.51197 |
| C | 0.87800  | 1.64925  | -1.09065 |
| H | 0.56008  | 2.39337  | -0.32687 |
| H | 1.82784  | 1.97707  | -1.55921 |
| H | 0.10119  | 1.56138  | -1.87648 |
| H | 1.90619  | 0.31693  | 0.11812  |
| O | -2.94091 | 0.38683  | 1.06521  |
| C | -4.08283 | 0.72171  | 0.25298  |
| H | -3.69446 | 0.97780  | -0.75260 |
| H | -4.79375 | -0.13047 | 0.16581  |
| H | -4.60791 | 1.60895  | 0.66806  |
| H | -1.73427 | -0.37284 | 0.55459  |
| H | -3.22730 | 0.18197  | 1.98205  |

\$vibrational spectrum

| #     | mode | symmetry | wave number           | IR intensity | selection |     |
|-------|------|----------|-----------------------|--------------|-----------|-----|
| rules |      |          | cm <sup>**</sup> (-1) | km/mol       | IR        |     |
| RAMAN |      |          |                       |              |           |     |
| 1     |      |          | 0.00                  | 0.00000      | -         | -   |
| 2     |      |          | 0.00                  | 0.00000      | -         | -   |
| 3     |      |          | 0.00                  | 0.00000      | -         | -   |
| 4     |      |          | 0.00                  | 0.00000      | -         | -   |
| 5     |      |          | 0.00                  | 0.00000      | -         | -   |
| 6     |      |          | 0.00                  | 0.00000      | -         | -   |
| 7     |      | a        | 17.61                 | 0.27981      | YES       | YES |
| 8     |      | a        | 29.76                 | 0.19242      | YES       | YES |
| 9     |      | a        | 41.03                 | 0.38854      | YES       | YES |
| 10    |      | a        | 47.60                 | 1.76431      | YES       | YES |



|    |   |         |            |     |     |
|----|---|---------|------------|-----|-----|
| 11 | a | 55.79   | 2.27203    | YES | YES |
| 12 | a | 70.30   | 8.76178    | YES | YES |
| 13 | a | 80.78   | 1.95901    | YES | YES |
| 14 | a | 89.66   | 1.47813    | YES | YES |
| 15 | a | 97.91   | 2.31500    | YES | YES |
| 16 | a | 108.10  | 0.46828    | YES | YES |
| 17 | a | 113.13  | 6.22458    | YES | YES |
| 18 | a | 123.17  | 1.51265    | YES | YES |
| 19 | a | 150.84  | 4.10865    | YES | YES |
| 20 | a | 154.17  | 1.43986    | YES | YES |
| 21 | a | 182.97  | 2.47060    | YES | YES |
| 22 | a | 287.62  | 49.92567   | YES | YES |
| 23 | a | 323.30  | 234.91437  | YES | YES |
| 24 | a | 372.20  | 111.89787  | YES | YES |
| 25 | a | 421.13  | 129.40268  | YES | YES |
| 26 | a | 571.02  | 27.95533   | YES | YES |
| 27 | a | 949.32  | 406.89352  | YES | YES |
| 28 | a | 973.91  | 325.32751  | YES | YES |
| 29 | a | 992.53  | 643.14029  | YES | YES |
| 30 | a | 1021.50 | 179.87823  | YES | YES |
| 31 | a | 1027.17 | 16.94326   | YES | YES |
| 32 | a | 1046.50 | 25.73077   | YES | YES |
| 33 | a | 1083.71 | 35.07033   | YES | YES |
| 34 | a | 1092.37 | 35.29998   | YES | YES |
| 35 | a | 1122.49 | 327.92452  | YES | YES |
| 36 | a | 1133.05 | 16.81579   | YES | YES |
| 37 | a | 1135.77 | 48.29859   | YES | YES |
| 38 | a | 1138.96 | 5.87035    | YES | YES |
| 39 | a | 1140.35 | 40.24077   | YES | YES |
| 40 | a | 1157.58 | 43.24470   | YES | YES |
| 41 | a | 1216.28 | 1423.65572 | YES | YES |
| 42 | a | 1320.95 | 146.08575  | YES | YES |
| 43 | a | 1348.45 | 47.24867   | YES | YES |
| 44 | a | 1350.54 | 34.41105   | YES | YES |
| 45 | a | 1403.39 | 31.64265   | YES | YES |
| 46 | a | 1419.93 | 1.61287    | YES | YES |
| 47 | a | 1428.09 | 16.68445   | YES | YES |
| 48 | a | 1429.22 | 4.11042    | YES | YES |
| 49 | a | 1434.63 | 65.72452   | YES | YES |
| 50 | a | 1435.49 | 17.57504   | YES | YES |

## S8. References

1. B. Chaudret, G. Commenges and R. Poilblanc, *J. Chem. Soc., Dalton Trans.*, **1984**, 1635.
2. S. Takahashi, Y. Kuroyama, K. Sonogashira and N. Hagihara, *Synthesis-Stuttgart*, **1980**, 627.
3. S. Marqués-González, M. Parthey, D. S. Yufit, J. A. K. Howard, M. Kaupp and P. J. Low, *Organomet.*, **2014**, 33, 4947.
4. F. J. Arnaiz, *J. Chem. Educ.*, **1997**, 74, 1332.
5. H. E. Gottlieb, V. Kotlyar and A. Nudelman, *J. Org. Chem.*, **1997**, 62, 7512.
6. N. G. Connelly and W. E. Geiger, *Chem. Rev.*, **1996**, 96, 877.
7. G. M. Sheldrick, *Acta Crystallogr., Sect. A*, **2008**, 64, 112.
8. O. V. Dolomanov, L. J. Bourhis, R. J. Gildea, J. A. K. Howard and H. Puschmann, *J Appl. Cryst.*, **2009**, 42, 339.
9. A. Klamt and G. Schuurmann, *J. Chem. Soc., Perkin Trans. 2*, **1993**, 799.
10. S. Grimme, J. Antony, S. Ehrlich and H. Krieg, *J. Chem. Phys.*, **2010**, 132, 154104.
11. S. Grimme, S. Ehrlich and L. Goerigk, *J. Comput. Chem.*, **2011**, 32, 1456.
12. P. Csaszar and P. Pulay, *J. Mol. Struct.*, **1984**, 114, 31.
13. R. Ahlrichs, M. Bar, M. Haser, H. Horn and C. Kolmel, *Chem. Phys. Lett.*, **1989**, 162, 165.
14. K. Eichkorn, O. Treutler, H. Ohm, M. Haser and R. Ahlrichs, *Chem. Phys. Lett.*, **1995**, 240, 283.
15. O. Treutler and R. Ahlrichs, *J. Chem. Phys.*, **1995**, 102, 346.
16. K. Eichkorn, F. Weigend, O. Treutler and R. Ahlrichs, *Theor. Chem. Acc.*, **1997**, 97, 119.
17. M. von Arnim and R. Ahlrichs, *J. Chem. Phys.*, **1999**, 111, 9183.
18. P. Deglmann and F. Furche, *J. Chem. Phys.*, **2002**, 117, 9535.
19. P. Deglmann, F. Furche and R. Ahlrichs, *Chem. Phys. Lett.*, **2002**, 362, 511.
20. P. Deglmann, K. May, F. Furche and R. Ahlrichs, *Chem. Phys. Lett.*, **2004**, 384, 103.
